# Supplementary material
Source: publisher figshare collection journal article supplement (https://acs.figshare.com/ndownloader/files/4281622)

## Supporting Information

# A Formal Synthesis of SCH 351448

*Heekwang Park, Hyongsu Kim, and Jiyong Hong\**

*Department of Chemistry, Duke University, Durham, North Carolina 27708, United States, and*

*College of Pharmacy, Ajou University, Suwon 443-749, Koera.*

\* To whom correspondence should be addressed.

Tel: 919-660-1545, Fax: 919-660-1605, E-mail: [jiyong.hong@duke.edu](mailto:jiyong.hong@duke.edu)

| <b>Contents</b>                                | <b>Page Number</b> |
|------------------------------------------------|--------------------|
| Experimental Section                           | S2                 |
| Copies of $^1\text{H}$ and $^{13}\text{C}$ NMR | S26                |

## Preparation of Hydroxy Alkene 10

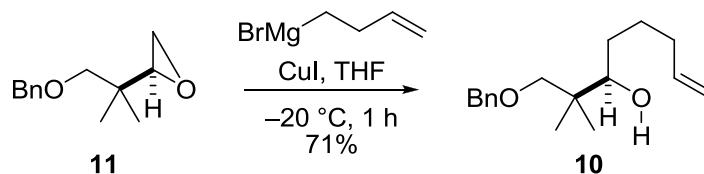

To a cooled ( $-78\text{ }^\circ\text{C}$ ) solution of 3-butenylmagnesium bromide (163 mg, 3.636 mmol) in THF (10 mL) were added CuI (93 mg, 0.485 mmol) and epoxide **11** (500 mg, 2.424 mmol) in THF (5 mL). After stirred for 1 h at  $-20\text{ }^\circ\text{C}$ , the reaction mixture was quenched with addition of saturated aqueous  $\text{NH}_4\text{Cl}$  solution. The layers were separated, and the aqueous layer was extracted with EtOAc. The combined organic layers were dried over anhydrous  $\text{Na}_2\text{SO}_4$  and concentrated *in vacuo*. The residue was purified by column chromatography (silica gel, EtOAc/hexanes, 1/20) to afford hydroxy alkene **10** (450 mg, 71%):  $[\alpha]_D^{25} = +29.9$  ( $c$  1.0,  $\text{CHCl}_3$ );  $^1\text{H}$  NMR (500 MHz,  $\text{CDCl}_3$ )  $\delta$  7.26–7.37 (m, 5H), 5.83 (dddd,  $J = 17.0, 10.0, 6.5, 6.5$  Hz, 1H), 5.02 (dd,  $J = 17.0, 1.5$  Hz, 1H), 4.95 (dd,  $J = 10.5, 1.0$  Hz, 1H), 4.51 (d,  $J = 4.0$  Hz, 2H), 3.42–3.45 (m, 1H), 3.40 (d,  $J = 8.5$  Hz, 1H), 3.29 (d,  $J = 9.0$  Hz, 1H), 3.20 (d,  $J = 4.0$  Hz, 1H), 2.04–2.14 (m, 2H), 1.69–1.79 (m, 1H), 1.38–1.50 (m, 2H), 1.26–1.34 (m, 1H), 0.92 (s, 3H), 0.91 (s, 3H);  $^{13}\text{C}$  NMR (125 MHz,  $\text{CDCl}_3$ )  $\delta$  139.1, 137.9, 128.5, 127.76, 127.56, 114.4, 80.0, 78.5, 73.6, 38.4, 33.9, 31.1, 26.0, 22.9, 19.8; IR (neat) 3500, 1098, 910, 738,  $698\text{ cm}^{-1}$ ; HRMS (ESI)  $m/z$  263.2004  $[(\text{M}+\text{H})^+]$ ,  $\text{C}_{17}\text{H}_{26}\text{O}_2$  requires 263.2006].

## Preparation of 2,6-*cis*-Tetrahydropyran **8** by Tandem CM/Oxa-Michael Reaction

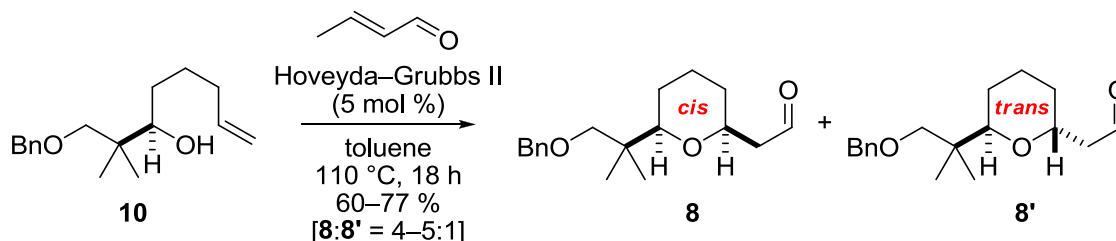

To a solution of hydroxy alkene **10** (50–200 mg, 0.191–0.762 mmol) in toluene (3–10 mL) were added (*E*)-crotonaldehyde (0.08–0.32 mL, 0.955–3.811 mmol) and Hoveyda–Grubbs II catalyst (5 mol %) at 25 °C. After refluxed for 18 h, the reaction mixture was concentrated *in vacuo*. The residue was purified by column chromatography (silica gel, EtOAc/hexanes, 1/40 to 1/20) to afford 2,6-*cis*-tetrahydropyran **8** (29–113 mg, 49–51%) and 2,6-*trans*-tetrahydropyran **8'** (6–29 mg, 10–13%): [**For 2,6-*cis*-tetrahydropyran 8**]  $[\alpha]_D^{25} = -9.9$  (*c* 1.0, CHCl<sub>3</sub>); <sup>1</sup>H NMR (500 MHz, CDCl<sub>3</sub>)  $\delta$  9.97 (dd, *J* = 3.0, 2.0 Hz, 1H), 7.25–7.38 (m, 5H), 4.48 (s, 2H), 3.79–3.85 (m, 1H), 3.33 (dd, *J* = 11.0, 1.5 Hz, 1H), 3.32 (d, *J* = 8.5 Hz, 1H), 3.15 (d, *J* = 8.5 Hz, 1H), 2.46 (ddd, *J* = 16.0, 8.0, 3.0 Hz, 1H), 2.39 (ddd, *J* = 16.0, 4.5, 2.0 Hz, 1H), 1.85–1.91 (m, 1H), 1.48–1.60 (m, 3H), 1.17–1.31 (m, 2H), 0.89 (s, 3H), 0.88 (s, 3H); <sup>13</sup>C NMR (125 MHz, CDCl<sub>3</sub>)  $\delta$  202.3, 139.1, 128.3, 127.41, 127.37, 81.4, 76.9, 73.5, 73.2, 50.0, 38.5, 31.5, 24.6, 23.8, 21.5, 20.3; IR (neat) 1725, 1090, 1048, 734 cm<sup>-1</sup>; HRMS (ESI) *m/z* 291.1954 [(M+H)<sup>+</sup>, C<sub>18</sub>H<sub>26</sub>O<sub>3</sub> requires 291.1955]. [**For 2,6-*trans*-tetrahydropyran 8'**]  $[\alpha]_D^{25} = -33.3$  (*c* 1.0, CHCl<sub>3</sub>); <sup>1</sup>H NMR (500 MHz, CDCl<sub>3</sub>)  $\delta$  9.77 (dd, *J* = 2.5, 2.0 Hz, 1H), 7.27–7.40 (m, 5H), 4.59–4.63 (m, 1H), 4.53 (d, *J* = 12.5 Hz, 1H), 4.44 (d, *J* = 12.0 Hz, 1H), 3.53 (dd, *J* = 11.5, 2.0 Hz, 1H), 3.29 (d, *J* = 8.5 Hz, 1H), 3.14 (d, *J* = 9.0 Hz, 1H), 3.06 (ddd, *J* = 16.0, 10.0, 3.0 Hz, 1H), 2.37 (ddd, *J* = 16.0, 10.5, 2.0 Hz, 1H), 1.78–1.86 (m, 1H), 1.70–1.76 (m, 1H), 1.55–1.66 (m, 2H), 1.42–1.46 (m, 1H), 1.34 (ddd, *J* = 24.5, 12.5, 4.0 Hz, 1H), 0.90 (s, 3H), 0.89 (s, 3H); <sup>13</sup>C NMR (125 MHz, CDCl<sub>3</sub>)  $\delta$  201.8, 139.0, 128.2, 127.43, 127.34, 76.7, 73.1, 72.8, 68.5, 44.4, 38.3, 28.3, 24.9, 21.5, 20.1, 18.8.

## Preparation of Methyl Ketone **9** by Myers' Asymmetric Alkylation

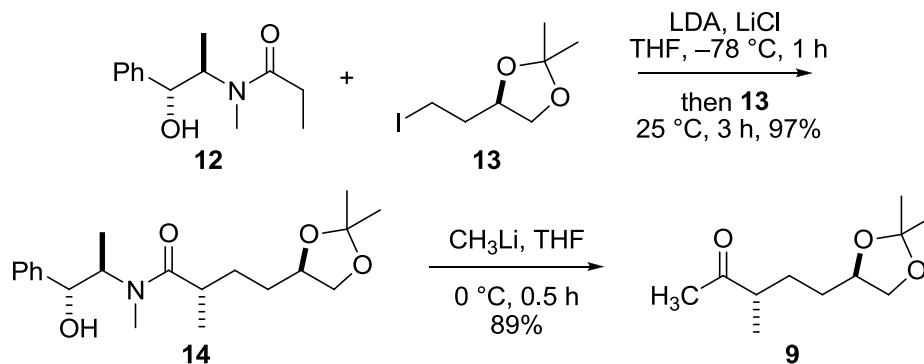

To a cooled ( $-78\text{ }^{\circ}\text{C}$ ) suspension of lithium chloride (153 mg, 3.616 mmol) in THF (2 mL) were added LDA (1.0 M, 1.4 mL, 1.4 mmol) and amide **12** (100 mg, 0.452 mmol) in THF (5 mL). The reaction mixture was stirred at  $-78\text{ }^{\circ}\text{C}$  for 1 h, at  $0\text{ }^{\circ}\text{C}$  for 15 min, at  $25\text{ }^{\circ}\text{C}$  for 5 min and then, cooled to  $0\text{ }^{\circ}\text{C}$ , and iodide **13** (310 mg, 1.356 mmol) was added. After stirred for 3 h at  $25\text{ }^{\circ}\text{C}$ , the reaction mixture was quenched with addition of saturated aqueous  $\text{NH}_4\text{Cl}$  solution. The layers were separated, and the aqueous layer was extracted with EtOAc. The combined organic layers were dried over anhydrous  $\text{Na}_2\text{SO}_4$  and concentrated *in vacuo*. The residue was purified by column chromatography (silica gel, EtOAc/hexanes, 1/1 to 2/1) to afford amide **14** (153 mg, 97 %):  $[\alpha]_{\text{D}}^{25} = -69.6$  ( $c$  1.0,  $\text{CHCl}_3$ );  $^1\text{H}$  NMR (2:1 rotamer ratio, \* denotes minor rotamer peaks, 500 MHz,  $\text{C}_6\text{H}_6$ )  $\delta$  7.05–7.35 (m, 5H), 5.12 (br, 1H), 4.56 (dd,  $J = 6.0\text{ Hz}$ , 1H), 4.38–4.45 (m, 1H), 4.34–4.40\* (m, 1H), 4.27\* (s, 1H), 4.07–4.13\* (m, 1H), 3.90–3.96\* (m, 1H), 3.87\* (dd,  $J = 7.0\text{ Hz}$ , 1H), 3.78–3.83 (m, 1H), 3.76 (dd,  $J = 7.0\text{ Hz}$ , 1H), 3.42\* (dd,  $J = 7.0\text{ Hz}$ , 1H), 3.32 (dd,  $J = 7.0\text{ Hz}$ , 1H), 2.82–2.89 (m, 1H), 2.84\* (s, 3H), 2.35 (s, 3H), 2.23–2.28 (m, 1H), 2.04–2.11\* (m, 1H), 1.62–1.85 (m, 1H), 1.02–1.53 (m, 2H), 1.42\* (s, 3H), 1.39 (s, 3H), 1.34\* (s, 3H), 1.29 (s, 3H), 0.99\* (d,  $J = 6.5\text{ Hz}$ , 3H), 0.96\* (d,  $J = 7.0\text{ Hz}$ , 3H), 0.91 (d,  $J = 6.5\text{ Hz}$ , 3H), 0.71 (d,  $J = 6.5\text{ Hz}$ , 3H);  $^{13}\text{C}$  NMR (2:1 rotamer ratio, \* denotes minor rotamer peaks, 125 MHz,  $\text{C}_6\text{H}_6$ )  $\delta$  177.2, 176.5\*, 143.3, 142.9\*, 128.3\*, 128.0, 127.0, 126.5, 108.4, 76.0\*, 75.74, 75.65, 74.9\*,

69.4\*, 69.2, 57.8, 36.1, 35.3\*, 31.14, 31.11\*, 30.0\*, 29.7, 26.97, 26.94, 25.77\*, 25.60, 18.1\*, 17.1, 15.3\*, 14.0 ; IR (neat) 3389, 1615, 1214, 1050, 701  $\text{cm}^{-1}$ ; HRMS (ESI)  $m/z$  350.2326  $[(M+H)^+]$ ,  $\text{C}_{20}\text{H}_{31}\text{NO}_4$  requires 350.2326].

To a cooled ( $-78\text{ }^{\circ}\text{C}$ ) solution of **14** (80 mg, 0.229 mmol) in THF (5 mL) was added methyllithium in diethyl ether (1.6 M, 0.72 mL, 1.145 mmol). The resulting mixture was warmed to  $0\text{ }^{\circ}\text{C}$  and stirred for 15 min at  $0\text{ }^{\circ}\text{C}$ . Excess methyllithium was scavenged by the addition of diisopropylamine (0.13 mL, 0.916 mmol) at  $0\text{ }^{\circ}\text{C}$ . The reaction mixture was quenched by addition of acetic acid in diethyl ether (10% v/v, 2 mL). After stirred for 15 min at  $25\text{ }^{\circ}\text{C}$ , the reaction mixture was neutralized with addition of saturated aqueous  $\text{NaHCO}_3$  solution. The layers were separated, and the aqueous layer was extracted with EtOAc. The combined organic layers were dried over anhydrous  $\text{Na}_2\text{SO}_4$  and concentrated *in vacuo*. The residue was purified by column chromatography (silica gel, EtOAc/hexanes, 1/10) to afford methyl ketone **9** (41 mg, 89 %):  $[\alpha]_{\text{D}}^{25} = -6.7$  ( $c$  1.0,  $\text{CHCl}_3$ );  $^1\text{H}$  NMR (500 MHz,  $\text{CDCl}_3$ )  $\delta$  3.90–3.97 (m, 2H), 3.39 (t,  $J = 7.0\text{ Hz}$ , 1H), 2.41–2.46 (m, 1H), 2.03 (s, 3H), 1.65–1.73 (m, 1H), 1.35–1.47 (m, 2H), 1.28 (s, 3H), 1.22–1.28 (m, 1H), 1.22 (s, 3H), 1.00 (d,  $J = 7.0\text{ Hz}$ , 3H);  $^{13}\text{C}$  NMR (125 MHz,  $\text{CDCl}_3$ )  $\delta$  212.1, 108.7, 75.7, 69.2, 45.8, 31.1, 28.6, 27.9, 26.9, 25.6, 16.2; IR (neat) 1713, 1057, 668  $\text{cm}^{-1}$ ; HRMS (ESI)  $m/z$  223.1305  $[(M+\text{Na})^+]$ ,  $\text{C}_{11}\text{H}_{20}\text{O}_3$  requires 223.1305].

## Preparation of $\beta$ -Hydroxy Ketone **15**

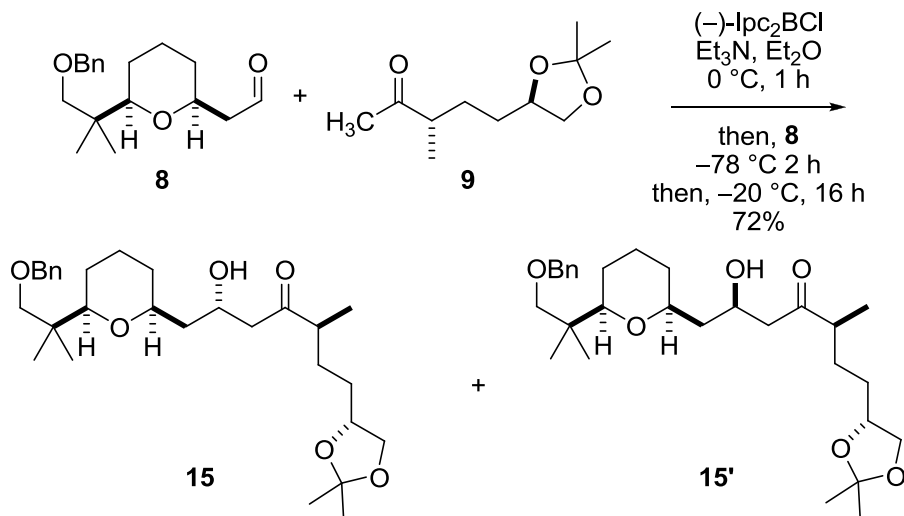

A flask charged with  $(-)\text{-Ipc}_2\text{BCl}$  (2.9 g, 9.09 mmol) was further dried under high vacuum for 2 h to remove traces of HCl. To a cooled ( $0\text{ }^\circ\text{C}$ ) solution of dried  $(-)\text{-Ipc}_2\text{Cl}$  in  $\text{Et}_2\text{O}$  (40 mL) were added methyl ketone **9** (910 mg, 4.54 mmol) in  $\text{Et}_2\text{O}$  (20 mL) and triethylamine (1.9 mL, 13.63 mmol), and the resulting white suspension was stirred for 1 h at  $0\text{ }^\circ\text{C}$ . The mixture was cooled to  $-78\text{ }^\circ\text{C}$ , and aldehyde **8** (1.8 g, 6.19 mmol) in  $\text{Et}_2\text{O}$  (30 mL) was added slowly. The reaction mixture was stirred for 2 h at  $-78\text{ }^\circ\text{C}$  and for additional 2 h at  $-20\text{ }^\circ\text{C}$ . The reaction mixture was kept in  $-20\text{ }^\circ\text{C}$  refrigerator for 14 h. The resulting mixture was stirred at  $0\text{ }^\circ\text{C}$  and pH 7 Phosphate buffer solution (8 mL), MeOH (2 mL), and 50%  $\text{H}_2\text{O}_2$  (5 mL) were added to the reaction mixture at  $0\text{ }^\circ\text{C}$ , and the resulting mixture was stirred for 1 h at  $25\text{ }^\circ\text{C}$ . The layers were separated, and the aqueous layer was extracted with  $\text{Et}_2\text{O}$ . The combined organic layers were dried over anhydrous  $\text{Na}_2\text{SO}_4$  and concentrated *in vacuo*. The residue was purified by column chromatography (silica gel,  $\text{EtOAc}$ /hexanes, 1/5) to afford an inseparable 9:1 mixture of **15** and **15'** (1.6 g, 72%): [**For 15**]  $[\alpha]_{\text{D}}^{25} = -0.7$  ( $c$  1.0,  $\text{CHCl}_3$ );  $^1\text{H}$  NMR (500 MHz,  $\text{CDCl}_3$ )  $\delta$  7.25–7.38 (m, 5H), 4.48 (AB,  $\Delta\nu = 32.5\text{ Hz}$ ,  $J_{\text{AB}} = 12.5\text{ Hz}$ , 2H), 4.26–4.31 (m, 1H), 3.98–4.07 (m, 3H), 3.57–3.62 (m, 1H), 3.50 (dd,  $J = 7.0, 6.5\text{ Hz}$ , 1H), 3.35 (d,  $J = 5.5\text{ Hz}$ , 1H), 3.25 (d,  $J = 9.0\text{ Hz}$ , 1H), 3.18 (d,  $J = 9.0\text{ Hz}$ ,

1H), 2.71 (dd,  $J = 16.5, 6.5$  Hz, 1H), 2.56 (dd,  $J = 7.0$  Hz, 1H), 2.50 (dd,  $J = 16.5, 5.0$  Hz, 1H), 1.76–1.86 (m, 2H), 1.44–1.65 (m, 7H), 1.40 (s, 3H), 1.34 (s, 3H), 1.19–1.33 (m, 3H), 1.09 (d,  $J = 7.0$  Hz, 3H), 0.92 (s, 3H), 0.88 (s, 3H);  $^{13}\text{C}$  NMR (125 MHz,  $\text{CDCl}_3$ )  $\delta$  213.5, 138.9, 128.3, 127.42, 127.36, 108.8, 82.1, 78.8, 77.2, 75.8, 73.2, 69.3, 67.9, 48.1, 46.6, 42.7, 38.3, 32.1, 31.1, 28.4, 26.9, 25.7, 24.9, 23.6, 21.6, 21.0, 16.2; IR (neat) 3478, 1709, 1368, 1046, 735  $\text{cm}^{-1}$ ; HRMS (ESI)  $m/z$  513.3189  $[(\text{M}+\text{Na})^+]$ ,  $\text{C}_{29}\text{H}_{46}\text{O}_6$  requires 513.3187].

### Preparation of 1,3-*anti*-Diol **16**

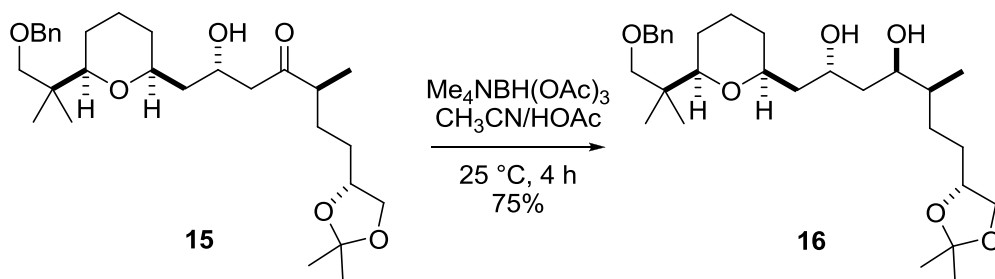

To a cooled ( $-20\text{ }^\circ\text{C}$ ) solution of  $\text{Me}_4\text{NBH}(\text{OAc})_3$  (3.7 g, 14.265 mmol) in  $\text{CH}_3\text{CN}/\text{HOAc}$  (1:1, 70 mL) was added **15** (1.4 g, 2.853 mmol) in  $\text{CH}_3\text{CN}$  (5 mL). After stirred for 4 h at  $25\text{ }^\circ\text{C}$ , the reaction mixture was quenched with addition of saturated aqueous  $\text{NaHCO}_3$  solution. The layers were separated, and the aqueous layer was extracted with  $\text{CH}_2\text{Cl}_2$ . The combined organic layers were dried over anhydrous  $\text{Na}_2\text{SO}_4$  and concentrated *in vacuo*. The residue was purified by column chromatography (silica gel,  $\text{EtOAc}/\text{hexanes}$ , 1/7 to 1/2) to afford 1,3-*anti*-diol **16** (1.05 g, 75%):  $[\alpha]_{\text{D}}^{25} = -4.3$  ( $c$  0.5,  $\text{CHCl}_3$ );  $^1\text{H}$  NMR (500 MHz,  $\text{CDCl}_3$ )  $\delta$  7.25–7.38 (m, 5H), 4.48 (AB,  $\Delta\nu = 31.0$  Hz,  $J_{\text{AB}} = 12.5$  Hz, 2H), 4.40 (s, 1H), 4.15–4.19 (m, 1H), 4.01–4.09 (m, 2H), 3.71–3.74 (m, 1H), 3.60 (dd,  $J = 10.5$  Hz, 1H), 3.50 (dd,  $J = 7.0$  Hz, 1H), 3.37–3.39 (m, 2H), 3.23 (d,  $J = 9.5$  Hz, 1H), 3.17 (d,  $J = 9.0$  Hz, 1H), 1.73–1.86 (m, 2H), 1.44–1.68 (m, 10H), 1.40 (s, 3H), 1.34 (s, 3H), 1.19–1.33 (m, 2H), 1.05–1.13 (m, 1H), 0.91 (s, 3H), 0.87 (d,  $J = 6.0$  Hz, 3H), 0.87 (s, 3H);  $^{13}\text{C}$  NMR (125 MHz,  $\text{CDCl}_3$ )  $\delta$  138.9, 128.3, 127.52, 127.48, 108.6, 82.3, 80.14, 77.3,

76.5, 73.2, 72.3, 70.8, 69.6, 42.4, 38.95, 38.81, 38.34, 32.4, 31.2, 28.3, 27.0, 25.8, 24.9, 23.6, 21.8, 21.1, 15.2; IR (neat) 3445, 1368, 1046, 735  $\text{cm}^{-1}$ ; HRMS (ESI)  $m/z$  493.2523  $[(M+H)^+]$ ,  $\text{C}_{29}\text{H}_{48}\text{O}_6$  requires 493.2524].

### Preparation of Acetal 17

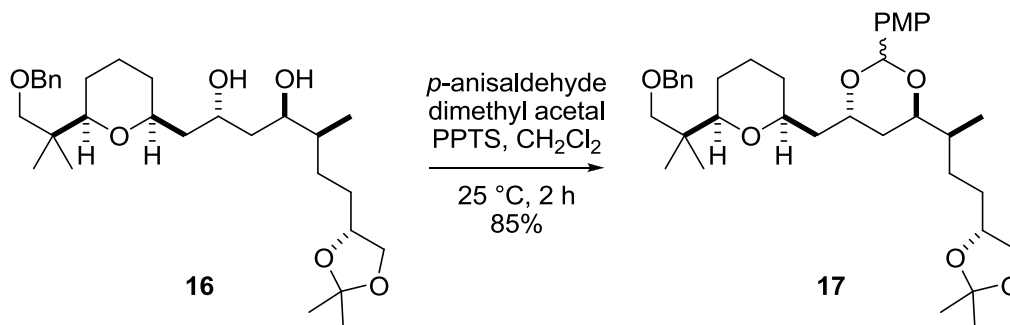

To a cooled ( $0\text{ }^\circ\text{C}$ ) solution of 1,3-*anti*-diol **16** (1.0 g, 2.029 mmol) in  $\text{CH}_2\text{Cl}_2$  (100 mL) were added  $p$ -anisaldehyde dimethyl acetal (1.1 g, 6.089 mmol) and PPTS (102 mg, 0.406 mmol). After stirred for 2 h at  $25\text{ }^\circ\text{C}$ , the reaction mixture was quenched with addition of saturated aqueous  $\text{NH}_4\text{Cl}$  solution. The layers were separated, and the aqueous layer was extracted with  $\text{CH}_2\text{Cl}_2$ . The combined organic layers were dried over anhydrous  $\text{Na}_2\text{SO}_4$  and concentrated *in vacuo*. The residue was purified by column chromatography (silica gel, EtOAc/ hexanes, 1/10) to afford 3:2 mixture of acetal **17** (1.05 g, 85%):  $[\alpha]_D^{25} = -4.3$  ( $c$  0.5,  $\text{CHCl}_3$ );  $^1\text{H}$  NMR (500 MHz,  $\text{CDCl}_3$ , 3:2 mixture, \* denotes minor peaks)  $\delta$  7.42\* (d,  $J = 9.0$  Hz, 2H), 7.40 (d,  $J = 9.0$  Hz, 2H), 7.26–7.35 (m, 5H), 6.88\* (d,  $J = 8.0$  Hz, 2H), 6.87 (d,  $J = 8.0$  Hz, 2H), 5.72 (s, 1H), 5.67\* (s, 1H), 4.45–4.53 (m, 2H), 4.16–4.42\* (m, 1H), 4.01–4.09 (m, 2H), 3.79 (s, 3H), 3.72–3.76 (m, 1H), 3.45–3.52\* (m, 1H), 3.33–3.40 (m, 1H), 3.36 (d,  $J = 9.0$  Hz, 1H), 3.26–3.30\* (m, 2H), 3.25 (d,  $J = 9.0$  Hz, 1H), 3.20\* (d,  $J = 11.5$  Hz, 1H), 3.16 (d,  $J = 9.0$  Hz, 1H), 2.30–2.38\* (m, 1H), 2.10–2.16 (m, 1H), 1.77–1.98 (m, 4H), 1.45–1.71 (m, 7H), 1.42 (s, 3H), 1.41\* (s, 3H), 1.37 (s,

3H), 1.36\* (s, 3H), 1.10–1.30 (m, 3H), 0.96\* (s, 3H), 0.90–0.91 (m, 9H); IR (neat) 1516, 1246, 1048, 669  $\text{cm}^{-1}$ ; HRMS (ESI)  $m/z$  633.3754  $[(M+Na)^+]$ ,  $\text{C}_{37}\text{H}_{54}\text{O}_7$  requires 633.3762].

### Preparation of Alcohol 18

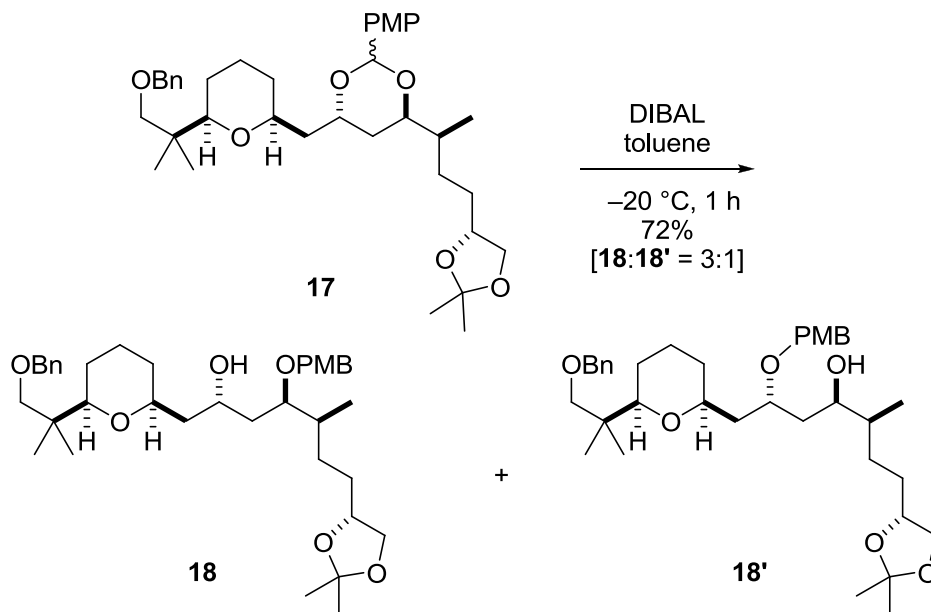

To a cooled ( $-20\text{ }^{\circ}\text{C}$ ) solution of acetal **17** (50 mg, 0.081 mmol) in toluene (2 mL) was added diisobutylaluminum hydride (1.0 M, 0.4 mL, 0.405 mmol). After stirred for 1 h at the same temperature, the reaction mixture was quenched with addition of saturated aqueous potassium sodium tartate solution and diluted with EtOAc. The layers were separated, and the aqueous layer was extracted with EtOAc. The combined organic layers were dried over anhydrous  $\text{Na}_2\text{SO}_4$  and concentrated *in vacuo*. The residue was purified by column chromatography (silica gel, EtOAc/hexanes, 1/10) to afford **18** (27 mg, 54%) and **18'** (9 mg, 18%): [**For 18**]  $[\alpha]_{\text{D}}^{25} = +8.6$  ( $c$  0.5,  $\text{CHCl}_3$ );  $^1\text{H}$  NMR (500 MHz,  $\text{CDCl}_3$ )  $\delta$  7.27–7.37 (m, 5H), 7.24 (d,  $J = 8.5$  Hz, 2H), 6.83 (d,  $J = 8.0$  Hz, 2H), 4.54 (d,  $J = 12.0$  Hz, 1H), 4.52 (d,  $J = 11.0$  Hz, 1H), 4.45 (d,  $J = 11.0$  Hz, 1H), 4.44 (d,  $J = 12.5$  Hz, 1H), 4.00–4.11 (m, 4H), 3.77 (s, 3H), 3.64 (ddd,  $J = 5.5, 5.0, 5.0$  Hz, 1H), 3.58 (dd,  $J = 10.5, 10.0$  Hz, 1H), 3.49 (dd,  $J = 7.0$  Hz, 1H), 3.39 (d,  $J = 11.0$  Hz, 1H),

3.29 (d,  $J = 9.0$  Hz, 1H), 3.21 (d,  $J = 8.5$  Hz, 1H), 1.79–1.86 (m, 2H), 1.45–1.66 (m, 10H), 1.41 (s, 3H), 1.35 (s, 3H), 1.18–1.32 (m, 2H), 1.04–1.13 (m, 1H), 0.95 (s, 3H), 0.87 (d,  $J = 5.5$  Hz, 3H), 0.89 (s, 3H);  $^{13}\text{C}$  NMR (125 MHz,  $\text{CDCl}_3$ )  $\delta$  159.1, 138.9, 131.3, 129.4, 128.3, 127.48, 127.42, 113.8, 108.6, 82.1, 79.8, 79.3, 77.3, 76.3, 73.3, 72.0, 69.5, 68.8, 55.3, 43.9, 38.45, 38.38, 35.8, 32.4, 31.7, 29.0, 27.0, 25.8, 24.9, 23.7, 21.6, 21.1, 14.3; IR (neat) 3501, 1516, 1250  $\text{cm}^{-1}$ ; HRMS (ESI)  $m/z$  635.3910  $[(\text{M}+\text{Na})^+]$ ,  $\text{C}_{37}\text{H}_{56}\text{O}_7$  requires 635.3918].

**[For 18']**  $[\alpha]_{\text{D}}^{25} = +3.6$  ( $c$  0.2,  $\text{CHCl}_3$ );  $^1\text{H}$  NMR (500 MHz,  $\text{CDCl}_3$ )  $\delta$  7.26–7.36 (m, 5H), 7.25 (d,  $J = 8.5$  Hz, 2H), 6.86 (d,  $J = 8.5$  Hz, 2H), 4.50 (d,  $J = 11.5$  Hz, 1H), 4.47 (d,  $J = 10.0$  Hz, 1H), 4.42 (d,  $J = 11.5$  Hz, 1H), 4.40 (d,  $J = 11.0$  Hz, 1H), 4.01–4.07 (m, 2H), 3.88–3.94 (m, 1H), 3.78 (s, 3H), 3.61–3.66 (m, 1H), 3.48 (dd,  $J = 7.0, 6.0$  Hz, 1H), 3.28 (d,  $J = 8.5$  Hz, 1H), 3.24–3.30 (m, 1H), 3.18 (d,  $J = 11.5$  Hz, 1H), 3.16 (d,  $J = 8.5$  Hz, 1H), 3.05 (s, 1H), 1.92–1.99 (m, 1H), 1.81–1.87 (m, 1H), 1.68–1.74 (m, 1H), 1.45–1.64 (m, 9H), 1.40 (s, 3H), 1.35 (s, 3H), 1.15–1.32 (m, 2H), 1.02–1.09 (m, 1H), 0.90 (s, 3H), 0.88 (s, 3H), 0.82 (d,  $J = 7.0$  Hz, 3H);  $^{13}\text{C}$  NMR (125 MHz,  $\text{CDCl}_3$ )  $\delta$  159.3, 139.2, 130.5, 129.6, 128.3, 127.42, 127.36, 113.9, 108.7, 81.6, 77.2, 76.6, 74.7, 73.9, 73.3, 72.2, 70.4, 69.6, 55.4, 39.6, 38.91, 38.68, 35.6, 32.3, 31.2, 28.3, 27.1, 25.9, 25.0, 24.0, 21.6, 20.7, 15.4.

### Determination of Absolute Stereochemistry of C9

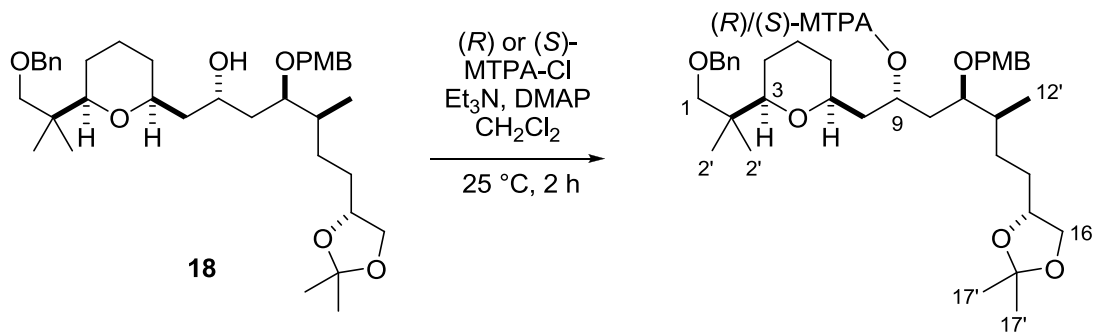

**[(*R*)-MTPA ester of 18]**  $^1\text{H}$  NMR (500 MHz,  $\text{CDCl}_3$ )  $\delta$  7.54–7.56 (m, 2H), 7.34–7.39 (m, 3H), 7.22–7.33 (m, 7H), 6.86 (d,  $J = 9.0$  Hz, 2H), 5.55–5.61 (m, 1H), 4.42 (d,  $J = 12.5$  Hz, 1H), 4.37

(d,  $J = 11.0$  Hz, 1H), 4.32 (d,  $J = 12.5$  Hz, 1H), 4.20 (d,  $J = 10.5$  Hz, 1H), 3.92–3.99 (m, 2H), 3.78 (s, 3H), 3.55 (s, 3H), 3.40–3.45 (m, 1H), 3.26–3.33 (m, 1H), 3.24 (d,  $J = 9.0$  Hz, 1H), 3.14 (d,  $J = 11.0$  Hz, 1H), 3.11 (d,  $J = 8.5$  Hz, 1H), 3.09–3.13 (m, 1H), 1.91–1.98 (m, 1H), 1.74–1.85 (m, 2H), 1.65–1.72 (m, 2H), 1.58–1.63 (m, 1H), 1.42–1.52 (m, 5H), 1.40 (s, 3H), 1.35 (s, 3H), 1.08–1.24 (m, 3H), 0.92–1.01 (m, 1H), 0.89 (s, 3H), 0.83 (s, 3H), 0.79 (d,  $J = 6.5$  Hz, 3H).

**[(*S*)-MTPA ester of 18]**  $^1\text{H}$  NMR (500 MHz,  $\text{CDCl}_3$ )  $\delta$  7.52–7.55 (m, 2H), 7.34–7.39 (m, 3H), 7.22–7.33 (m, 7H), 6.86 (d,  $J = 8.5$  Hz, 2H), 5.50–5.58 (m, 1H), 4.43 (d,  $J = 13.0$  Hz, 1H), 4.32 (d,  $J = 10.5$  Hz, 1H), 4.35 (d,  $J = 12.5$  Hz, 1H), 4.25 (d,  $J = 10.5$  Hz, 1H), 3.97–4.01 (m, 2H), 3.78 (s, 3H), 3.49 (s, 3H), 3.42–3.47 (m, 1H), 3.17–3.27 (m, 2H), 3.24 (d,  $J = 9.0$  Hz, 1H), 3.12 (d,  $J = 8.5$  Hz, 1H), 3.09 (d,  $J = 11.5$  Hz, 1H), 1.62–1.89 (m, 6H), 1.29–1.55 (m, 5H), 1.40 (s, 3H), 1.36 (s, 3H), 1.00–1.24 (m, 4H), 0.89 (s, 3H), 0.84 (d,  $J = 6.5$  Hz, 3H), 0.83 (s, 3H).

**Chemical shift of (*R*) and (*S*)-MTPA ester of 18**

|                                | H-1A   | H-2'   | H-2'   | H-3    | H-16A  | H-16B  | H-17'  | H-17'  | H-12'  |
|--------------------------------|--------|--------|--------|--------|--------|--------|--------|--------|--------|
| ( <i>S</i> )-MTPA ester        | 3.237  | 0.888  | 0.828  | 3.092  | 3.448  | 3.991  | 1.403  | 1.355  | 0.845  |
| ( <i>R</i> )-MTPA ester        | 3.244  | 0.892  | 0.829  | 3.140  | 3.429  | 3.965  | 1.401  | 1.353  | 0.795  |
| $\delta_S - \delta_R$<br>(ppm) | −0.007 | −0.004 | −0.001 | −0.048 | +0.019 | +0.026 | +0.002 | +0.002 | +0.050 |

## Preparation of **19**

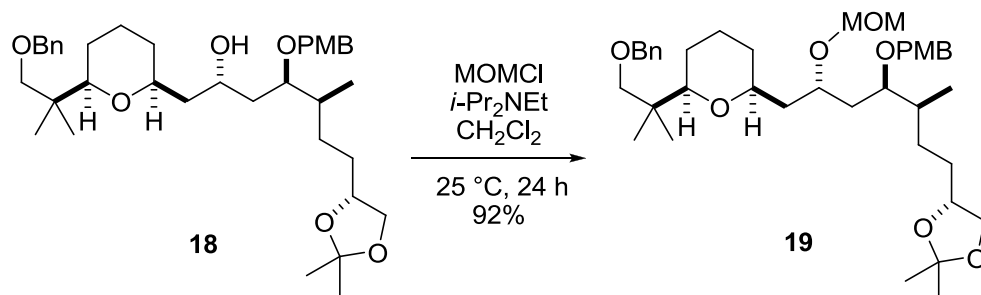

To a solution of alcohol **18** (300 mg, 0.489 mmol) in  $\text{CH}_2\text{Cl}_2$  (15 mL) were added *N,N*-diisopropylethylamine (1.7 mL, 9.790 mmol) and chloromethyl methyl ether (0.37 mL, 4.895 mmol) at 25 °C. After stirred for 24 h at the same temperature, the reaction mixture was quenched with addition of saturated aqueous  $\text{NH}_4\text{Cl}$  solution. The layers were separated, and the aqueous layer was extracted with  $\text{CH}_2\text{Cl}_2$ . The combined organic layers were dried over anhydrous  $\text{Na}_2\text{SO}_4$  and concentrated *in vacuo*. The residue was purified by column chromatography (silica gel, EtOAc/hexanes, 1/5) to afford **19** (299 mg, 92%):  $[\alpha]_{\text{D}}^{25} = +11.2$  (*c* 0.5,  $\text{CHCl}_3$ );  $^1\text{H}$  NMR (500 MHz,  $\text{CDCl}_3$ )  $\delta$  7.25–7.36 (m, 7H), 6.87 (d,  $J = 8.5$  Hz, 2H), 4.67 (d,  $J = 7.0$  Hz, 1H), 4.57 (d,  $J = 6.5$  Hz, 1H), 4.53 (d,  $J = 10.5$  Hz, 1H), 4.47 (d,  $J = 12.0$  Hz, 1H), 4.39 (d,  $J = 12.5$  Hz, 1H), 4.38 (d,  $J = 11.0$  Hz, 1H), 4.03–4.09 (m, 2H), 3.96–4.01 (m, 1H), 3.80 (s, 3H), 3.57–3.60 (m, 1H), 3.51 (dd,  $J = 5.5$  Hz, 1H), 3.39 (s, 3H), 3.36–3.42 (m, 1H), 3.29 (d,  $J = 8.5$  Hz, 1H), 3.21 (d,  $J = 9.0$  Hz, 1H), 3.20 (d,  $J = 10.5$  Hz, 1H), 1.82–1.96 (m, 3H), 1.45–1.69 (m, 8H), 1.44 (s, 3H), 1.38 (s, 3H), 1.08–1.30 (m, 4H), 0.95 (s, 3H), 0.91 (d,  $J = 6.5$  Hz, 3H), 0.88 (s, 3H);  $^{13}\text{C}$  NMR (125 MHz,  $\text{CDCl}_3$ )  $\delta$  159.1, 139.3, 131.4, 129.3, 128.2, 127.33, 127.26, 113.7, 108.7, 96.2, 81.7, 79.1, 77.2, 76.4, 74.5, 73.22, 73.18, 70.9, 69.6, 55.8, 55.3, 42.8, 38.6, 35.8, 34.9, 32.3, 31.9, 29.3, 27.1, 25.8, 25.0, 24.1, 21.45, 21.27, 13.9; IR (neat) 1514, 1246, 1034,  $697\text{ cm}^{-1}$ ; HRMS (ESI)  $m/z$  679.4170  $[(\text{M}+\text{Na})^+]$ ,  $\text{C}_{39}\text{H}_{60}\text{O}_8$  requires 679.4180].

## Preparation of Diol **24**

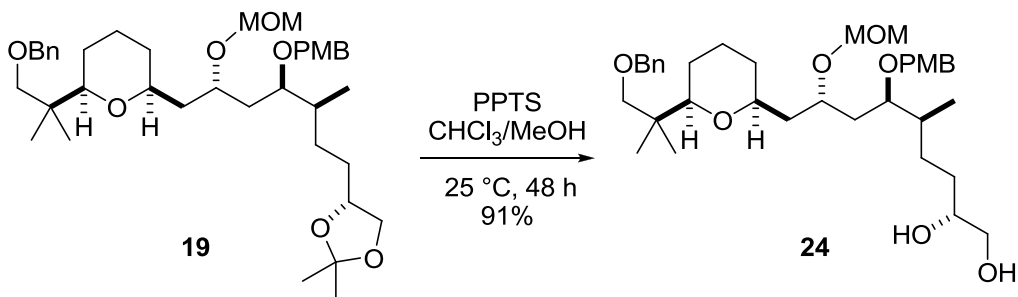

To a solution of **19** (295 mg, 0.449 mmol) in  $\text{CHCl}_3/\text{MeOH}$  (1:1, 14 mL) was added PPTS (113 mg, 0.449 mmol) at 25 °C. After stirred for 48 h at the same temperature, the reaction mixture was quenched with addition of saturated aqueous  $\text{NaHCO}_3$  solution. The layers were separated, and the aqueous layer was extracted with  $\text{CH}_2\text{Cl}_2$ . The combined organic layers were dried over anhydrous  $\text{Na}_2\text{SO}_4$  and concentrated *in vacuo*. The residue was purified by column chromatography (silica gel, EtOAc/hexanes, 1/3 to 2/1) to afford diol **24** (249 mg, 91%):  $[\alpha]_{\text{D}}^{25} = +15.3$  (*c* 0.5,  $\text{CHCl}_3$ );  $^1\text{H}$  NMR (500 MHz,  $\text{CDCl}_3$ )  $\delta$  7.25–7.36 (m, 7H), 6.87 (d,  $J = 8.5$  Hz, 2H), 4.66 (d,  $J = 6.5$  Hz, 1H), 4.57 (d,  $J = 6.5$  Hz, 1H), 4.52 (d,  $J = 10.5$  Hz, 1H), 4.47 (d,  $J = 12.0$  Hz, 1H), 4.39 (d,  $J = 12.5$  Hz, 1H), 4.38 (d,  $J = 11.5$  Hz, 1H), 3.95–4.05 (m, 1H), 3.80 (s, 3H), 3.63–3.68 (m, 2H), 3.57–3.61 (m, 1H), 3.35–3.45 (m, 2H), 3.39 (s, 3H), 3.29 (d,  $J = 9.0$  Hz, 1H), 3.21 (d,  $J = 9.0$  Hz, 1H), 3.20 (d,  $J = 10.5$  Hz, 1H), 2.56 (br s, 1H), 2.41 (br s, 1H), 1.81–1.96 (m, 3H), 1.63–1.70 (m, 1H), 1.41–1.59 (m, 8H), 1.12–1.29 (m, 3H), 0.95 (s, 3H), 0.91 (d,  $J = 7.0$  Hz, 3H), 0.88 (s, 3H);  $^{13}\text{C}$  NMR (125 MHz,  $\text{CDCl}_3$ )  $\delta$  159.0, 139.3, 131.3, 129.3, 128.2, 127.34, 127.27, 113.7, 96.1, 81.7, 78.9, 77.2, 74.5, 73.31, 73.19, 72.6, 70.8, 66.8, 55.8, 55.3, 42.8, 38.6, 35.7, 34.9, 32.3, 31.4, 29.1, 25.0, 24.1, 21.43, 21.24, 14.1; IR (neat) 3418, 1456, 1250, 739  $\text{cm}^{-1}$ ; HRMS (ESI)  $m/z$  639.3851 [ $(\text{M}+\text{Na})^+$ ,  $\text{C}_{36}\text{H}_{56}\text{O}_8$  requires 639.3867].

## Preparation of Epoxide 6

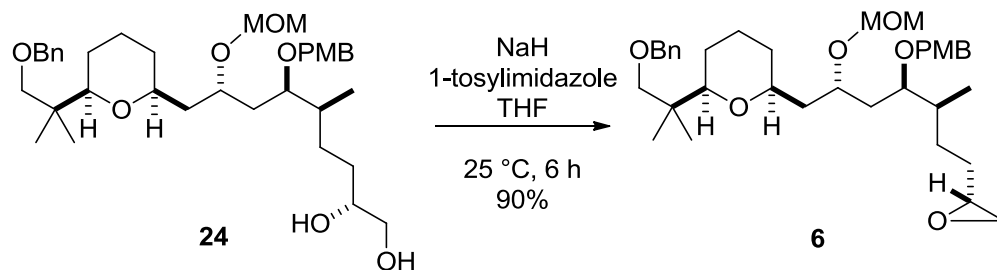

To a cooled (0 °C) solution of diol **24** (245 mg, 0.397 mmol) in THF (10 mL) was added NaH (60% dispersion in mineral oil, 48 mg, 1.192 mmol) and the resulting mixture was stirred for 20 min before 1-tosylimidazole (106.0 mg, 0.476 mmol) was added. After stirred for 6 h at 25 °C, the reaction mixture was quenched with addition of saturated aqueous NH<sub>4</sub>Cl solution and diluted with EtOAc. The layers were separated, and the aqueous layer was extracted with EtOAc. The combined organic layers were dried over anhydrous Na<sub>2</sub>SO<sub>4</sub> and concentrated *in vacuo*. The residue was purified by column chromatography (silica gel, EtOAc/hexanes, 1/5) to afford epoxide **6** (214 mg, 90%):  $[\alpha]_D^{25} = +22.7$  (*c* 0.5, CHCl<sub>3</sub>); <sup>1</sup>H NMR (500 MHz, CDCl<sub>3</sub>) δ 7.25–7.33 (m, 7H), 6.85 (d, *J* = 9.0 Hz, 2H), 4.65 (d, *J* = 6.5 Hz, 1H), 4.55 (d, *J* = 6.5 Hz, 1H), 4.51 (d, *J* = 11.0 Hz, 1H), 4.45 (d, *J* = 12.5 Hz, 1H), 4.37 (d, *J* = 12.0 Hz, 1H), 4.36 (d, *J* = 10.5 Hz, 1H), 3.93–3.99 (m, 1H), 3.78 (s, 3H), 3.54–3.59 (m, 1H), 3.33–3.40 (m, 1H), 3.37 (s, 3H), 3.27 (d, *J* = 8.5 Hz, 1H), 3.19 (d, *J* = 9.0 Hz, 1H), 3.18 (d, *J* = 13.0 Hz, 1H), 2.87–2.91 (m, 1H), 2.74 (dd, *J* = 4.5, 4.0 Hz, 1H), 2.46 (dd, *J* = 5.0, 3.0 Hz, 1H), 1.90–1.96 (m, 1H), 1.79–1.86 (m, 2H), 1.41–1.71 (m, 9H), 1.12–1.31 (m, 3H), 0.93 (s, 3H), 0.89 (d, *J* = 7.0 Hz, 3H), 0.86 (s, 3H); <sup>13</sup>C NMR (125 MHz, CDCl<sub>3</sub>) δ 159.1, 139.3, 131.4, 129.3, 128.2, 127.33, 127.25, 113.8, 96.2, 81.7, 79.1, 77.2, 74.5, 73.24, 73.17, 70.9, 55.8, 55.3, 52.6, 47.1, 42.8, 38.6, 35.8, 34.7, 32.3, 30.8, 29.4, 25.0, 24.1, 21.44, 21.25, 13.9; IR (neat) 1513, 1247, 1035, 668 cm<sup>-1</sup>; HRMS (ESI) *m/z* 621.3753 [(M+Na)<sup>+</sup>, C<sub>36</sub>H<sub>54</sub>O<sub>7</sub> requires 621.3762].

## Preparation of Allyl Alcohol 5

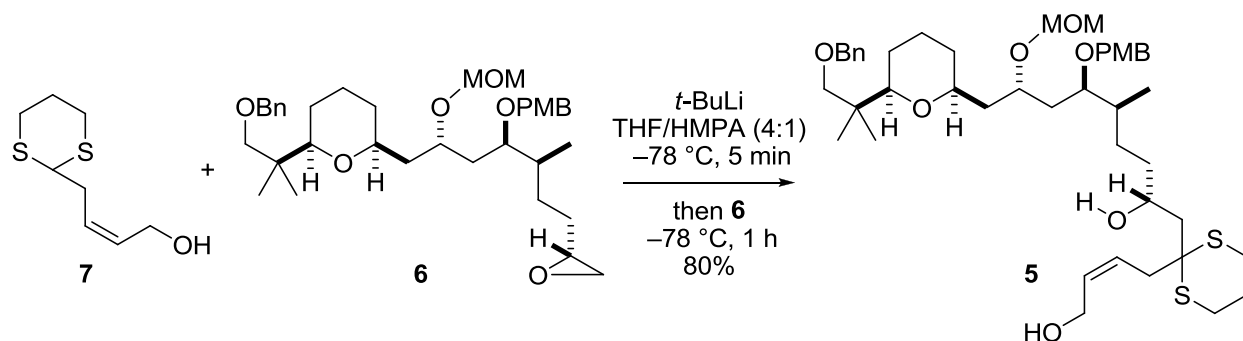

To a cooled ( $-78\text{ }^{\circ}\text{C}$ ) solution of **7** (405 mg, 2.138 mmol) in THF/HMPA (4:1, 12.5 mL) was added dropwise *t*-BuLi (2.5 mL, 1.7 M in pentane, 4.276 mmol) and the resulting mixture was stirred for 5 min before epoxide **6** (160 mg, 0.267 mmol) was added. After stirred for 1 h at  $-78\text{ }^{\circ}\text{C}$ , the reaction mixture was quenched with addition of saturated aqueous  $\text{NH}_4\text{Cl}$  solution and diluted with EtOAc. The layers were separated, and the aqueous layer was extracted with EtOAc. The combined organic layers were washed with brine, dried over anhydrous  $\text{Na}_2\text{SO}_4$ , and concentrated *in vacuo*. The residue was purified by column chromatography (silica gel, EtOAc/hexanes, 1/2) to afford allyl alcohol **5** (168 mg, 80%):  $[\alpha]_{\text{D}}^{25} = +7.0$  (*c* 0.5,  $\text{CHCl}_3$ );  $^1\text{H}$  NMR (500 MHz,  $\text{CDCl}_3$ )  $\delta$  7.25–7.35 (m, 7H), 6.86 (d,  $J = 8.5$  Hz, 2H), 5.81–5.86 (m, 1H), 5.69–5.74 (m, 1H), 4.66 (d,  $J = 7.0$  Hz, 1H), 4.56 (d,  $J = 6.0$  Hz, 1H), 4.53 (d,  $J = 10.5$  Hz, 1H), 4.47 (d,  $J = 12.5$  Hz, 1H), 4.39 (d,  $J = 10.0$  Hz, 1H), 4.37 (d,  $J = 8.0$  Hz, 1H), 4.24 (dd,  $J = 12.5$ , 6.5 Hz, 1H), 4.16 (dd,  $J = 12.5$ , 6.5 Hz, 1H), 3.94–4.05 (m, 2H), 3.79 (s, 3H), 3.56–3.60 (m, 1H), 3.38 (s, 3H), 3.34–3.42 (m, 1H), 3.28 (d,  $J = 8.5$  Hz, 1H), 3.21 (d,  $J = 9.0$  Hz, 1H), 3.19 (d,  $J = 9.0$  Hz, 1H), 2.79–3.00 (m, 5H), 2.73 (dd,  $J = 15.0$ , 7.0 Hz, 1H), 2.19–2.26 (m, 2H), 1.80–2.09 (m, 7H), 1.62–1.70 (m, 1H), 1.42–1.59 (m, 8H), 1.12–1.29 (m, 3H), 0.95 (s, 3H), 0.91 (d,  $J = 6.0$  Hz, 3H), 0.88 (s, 3H);  $^{13}\text{C}$  NMR (125 MHz,  $\text{CDCl}_3$ )  $\delta$  159.0, 139.3, 132.0, 131.4, 129.3, 128.2, 127.32, 127.22, 126.2, 113.7, 96.1, 81.7, 79.0, 77.2, 74.5, 73.25, 73.14, 70.7, 69.1, 58.4, 55.8,

55.3, 51.9, 44.7, 42.8, 38.6, 37.3, 36.2, 35.6, 34.7, 32.3, 29.0, 26.46, 26.25, 25.03, 24.89, 24.1, 21.41, 21.19, 13.9; IR (neat) 3445, 1516, 1249, 1039, 739  $\text{cm}^{-1}$ ; HRMS (ESI)  $m/z$  811.4242  $[(M+Na)^+]$ ,  $\text{C}_{44}\text{H}_{68}\text{O}_8\text{S}_2$  requires 811.4248].

## Preparation of 2,6-*cis*-Tetrahydropyran Aldehyde **20** by Tandem Oxidation/Oxa-Michael Reaction

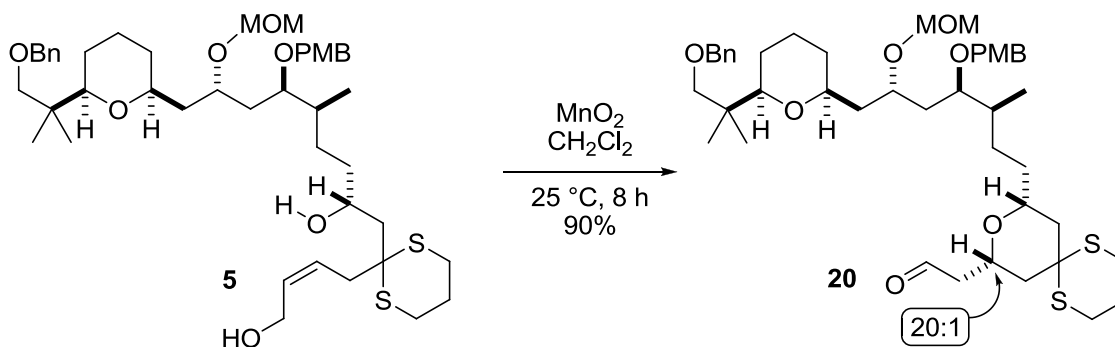

To a stirred solution of allyl alcohol **5** (128 mg, 0.162 mmol) in  $\text{CH}_2\text{Cl}_2$  (10 mL) was added  $\text{MnO}_2$  (212 mg, 2.433 mmol) at  $25^\circ\text{C}$ . After stirred for 8 h at the same temperature, the reaction mixture was filtered through celite with EtOAc and concentrated *in vacuo*. The residue was purified by column chromatography (silica gel, EtOAc/hexanes, 1/5 to 1/3) to afford 2,6-*cis*-tetrahydropyran aldehyde **20** (115 mg, 90%):  $[\alpha]_{\text{D}}^{25} = +15.1$  ( $c$  0.5,  $\text{CHCl}_3$ );  $^1\text{H}$  NMR (500 MHz,  $\text{CDCl}_3$ )  $\delta$  9.80 (s, 1H), 7.25–7.35 (m, 7H), 6.86 (d,  $J = 5.0$  Hz, 2H), 4.67 (d,  $J = 7.0$  Hz, 1H), 4.57 (d,  $J = 6.5$  Hz, 1H), 4.52 (d,  $J = 10.5$  Hz, 1H), 4.47 (d,  $J = 13.0$  Hz, 1H), 4.39 (d,  $J = 9.0$  Hz, 1H), 4.37 (d,  $J = 7.5$  Hz, 1H), 4.30–4.35 (m, 1H), 3.94–4.05 (m, 1H), 3.79 (s, 3H), 3.73–3.82 (m, 1H), 3.54–3.58 (m, 1H), 3.39 (s, 3H), 3.34–3.42 (m, 1H), 3.28 (d,  $J = 8.5$  Hz, 1H), 3.21 (d,  $J = 9.0$  Hz, 1H), 3.19 (d,  $J = 10.5$  Hz, 1H), 2.73–3.00 (m, 4H), 2.62 (ddd,  $J = 16.5, 8.0, 2.5$  Hz, 1H), 2.47 (ddd,  $J = 16.5, 4.5, 2.5$  Hz, 1H), 2.37 (d,  $J = 13.5$  Hz, 1H), 2.20 (d,  $J = 13.5$  Hz, 1H), 1.95–2.10 (m, 2H), 1.81–1.92 (m, 3H), 1.44–1.69 (m, 11H), 1.12–1.29 (m, 3H), 0.95 (s, 3H), 0.89 (d,  $J$

= 8.0 Hz, 3H), 0.88 (s, 3H);  $^{13}\text{C}$  NMR (125 MHz,  $\text{CDCl}_3$ )  $\delta$  200.9, 159.0, 139.3, 131.4, 129.3, 128.2, 127.31, 127.21, 113.7, 96.2, 81.7, 79.2, 77.2, 74.5, 73.21, 73.14, 73.03, 70.8, 68.5, 55.8, 55.3, 49.1, 47.8, 43.20, 42.90, 42.78, 38.6, 35.8, 34.8, 33.9, 32.3, 28.8, 26.00, 25.93, 25.81, 25.0, 24.1, 21.4, 21.2, 13.9; IR (neat) 1725, 1512, 1035, 668  $\text{cm}^{-1}$ ; HRMS (ESI)  $m/z$  809.4087  $[(\text{M}+\text{Na})^+]$ ,  $\text{C}_{44}\text{H}_{66}\text{O}_8\text{S}_2$  requires 809.4081].

### Preparation of Alkyne 4

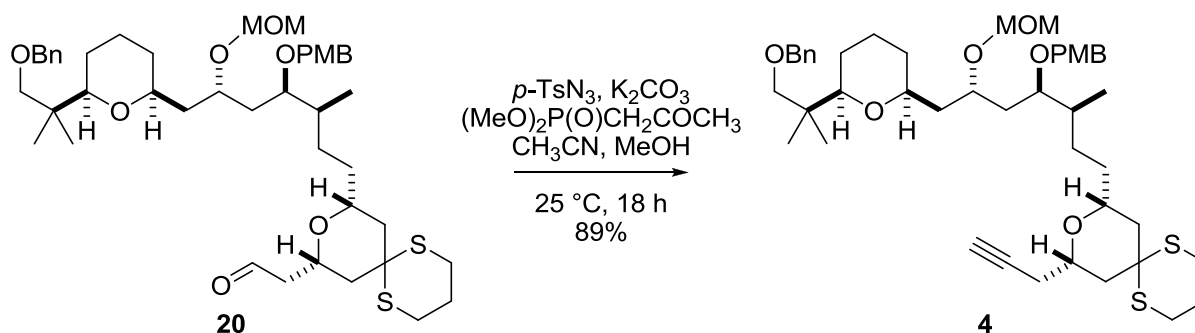

To a suspension of  $\text{K}_2\text{CO}_3$  (351 mg, 2.541 mmol) and *p*-toluenesulfonyl azide (1.0 M, 1.02 mL, 1.016 mmol) in  $\text{CH}_3\text{CN}$  (7 mL) was added dimethyl-2-oxopropylphosphonate (169 mg, 1.016 mmol) at  $25\text{ }^\circ\text{C}$ . The resulting suspension was stirred for 2 h at the same temperature and then the aldehyde **20** (160 mg, 0.203 mmol) in  $\text{MeOH}$  (5 mL) was added. After stirred for 18 h at the same temperature, the solvents were removed *in vacuo* and the residue was dissolved in  $\text{EtOAc}/\text{H}_2\text{O}$  (1:1, 30 mL). The layers were separated, and the aqueous layer was extracted with  $\text{EtOAc}$ . The combined organic layers were dried over anhydrous  $\text{Na}_2\text{SO}_4$ , and concentrated *in vacuo*. The residue was purified by column chromatography (silica gel,  $\text{EtOAc}/\text{hexanes}$ , 1/5) to afford alkyne **4** (141 mg, 89%):  $[\alpha]_{\text{D}}^{25} = +16.2$  ( $c$  0.5,  $\text{CHCl}_3$ );  $^1\text{H}$  NMR (500 MHz,  $\text{CDCl}_3$ )  $\delta$  7.25–7.35 (m, 7H), 6.86 (d,  $J = 9.0$  Hz, 2H), 4.67 (d,  $J = 7.0$  Hz, 1H), 4.58 (d,  $J = 6.5$  Hz, 1H), 4.52 (d,  $J = 10.5$  Hz, 1H), 4.47 (d,  $J = 12.5$  Hz, 1H), 4.39 (d,  $J = 12.5$  Hz, 1H), 4.36 (d,  $J = 11.0$  Hz, 1H), 3.95–4.05 (m, 1H), 3.89–3.95 (m, 1H), 3.80 (s, 3H), 3.74–3.81 (m, 1H), 3.55–3.59 (m,

1H), 3.39 (s, 3H), 3.35–3.42 (m, 1H), 3.29 (d,  $J = 9.0$  Hz, 1H), 3.21 (d,  $J = 9.0$  Hz, 1H), 3.20 (d,  $J = 9.5$  Hz, 1H), 2.73–3.02 (m, 4H), 2.57 (d,  $J = 13.5$  Hz, 1H), 2.52 (ddd,  $J = 16.5, 5.5, 3.0$  Hz, 1H), 2.34 (ddd,  $J = 16.5, 7.5, 2.5$  Hz, 1H), 2.21 (d,  $J = 14.0$  Hz, 1H), 1.95–2.10 (m, 3H), 1.81–1.94 (m, 3H), 1.44–1.70 (m, 11H), 1.12–1.29 (m, 3H), 0.95 (s, 3H), 0.89 (d,  $J = 7.5$  Hz, 3H), 0.88 (s, 3H);  $^{13}\text{C}$  NMR (125 MHz,  $\text{CDCl}_3$ )  $\delta$  159.0, 139.4, 131.5, 129.3, 128.2, 127.34, 127.23, 113.7, 96.2, 81.7, 80.5, 79.3, 77.2, 74.5, 73.22, 73.17, 73.15, 71.2, 70.8, 70.5, 55.8, 55.3, 48.0, 43.2, 42.9, 42.1, 38.6, 35.8, 34.8, 34.0, 32.3, 28.9, 26.03, 25.93 (2 carbons), 25.5, 25.0, 24.1, 21.4, 21.2, 13.8; IR (neat) 3304, 1514, 1248, 1038, 738  $\text{cm}^{-1}$ ; HRMS (ESI)  $m/z$  805.4136  $[(\text{M}+\text{Na})^+]$ ,  $\text{C}_{45}\text{H}_{66}\text{O}_7\text{S}_2$  requires 805.4142].

## Preparation of 21

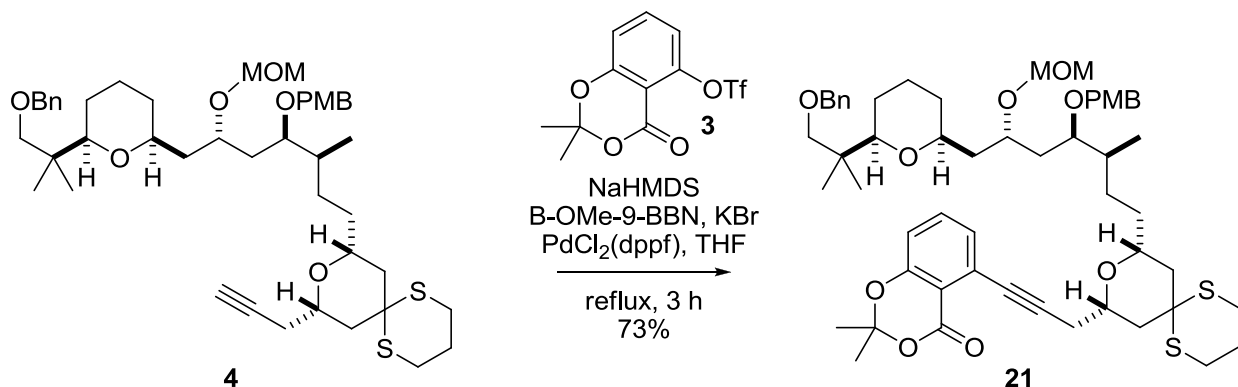

To a cooled ( $-78$  °C) solution of alkyne **4** (117 mg, 0.149 mmol) in THF (10 mL) was added NaHMDS (1.0 M, 0.30 mL, 0.299 mmol). After stirred for 30 min at the same temperature, B-OMe-9-BBN (1.0 M, 0.37 mL, 0.374 mmol) was added and the resulting mixture was then warmed to  $25$  °C. After stirred for 30 min, KBr (36 mg, 0.299 mmol),  $\text{PdCl}_2(\text{dppf})$  (22 mg, 0.030 mmol), and triflate **3** (98 mg, 0.299 mmol) were added. After refluxed for 3 h, the reaction mixture was cooled to  $25$  °C and quenched with addition of saturated aqueous  $\text{NH}_4\text{Cl}$  solution. The layers were separated, and the aqueous layer was extracted with EtOAc. The combined

organic layers were dried over anhydrous  $\text{Na}_2\text{SO}_4$  and concentrated *in vacuo*. The residue was purified by column chromatography (silica gel, EtOAc/hexanes, 1/10 to 1/5) to afford **21** (122 mg, 73%):  $[\alpha]_{\text{D}}^{25} = +1.6$  ( $c$  0.2,  $\text{CHCl}_3$ );  $^1\text{H}$  NMR (500 MHz,  $\text{CDCl}_3$ )  $\delta$  7.42 (dd,  $J = 8.5, 7.5$  Hz, 1H), 7.21–7.33 (m, 8H), 6.88 (d,  $J = 8.0$  Hz, 1H), 6.84 (d,  $J = 8.5$  Hz, 2H), 4.64 (d,  $J = 7.0$  Hz, 1H), 4.55 (d,  $J = 6.0$  Hz, 1H), 4.50 (d,  $J = 11.5$  Hz, 1H), 4.45 (d,  $J = 13.0$  Hz, 1H), 4.36 (d,  $J = 12.5$  Hz, 1H), 4.34 (d,  $J = 10.5$  Hz, 1H), 4.01–4.07 (m, 1H), 3.92–3.99 (m, 1H), 3.77 (s, 3H), 3.73–3.82 (m, 1H), 3.52–3.58 (m, 1H), 3.36 (s, 3H), 3.31–3.40 (m, 1H), 3.15–3.27 (m, 4H), 2.74–3.05 (m, 2H), 2.85 (dd,  $J = 17.0, 5.0$  Hz, 1H), 2.73–2.79 (m, 1H), 2.63–2.68 (m, 1H), 2.63 (dd,  $J = 17.0, 9.0$  Hz, 1H), 2.05–2.13 (m, 2H), 1.79–1.97 (m, 4H), 1.71 (s, 6H), 1.41–1.69 (m, 11H), 1.10–1.23 (m, 3H), 0.92 (s, 3H), 0.86 (d,  $J = 8.0$  Hz, 3H), 0.86 (s, 3H);  $^{13}\text{C}$  NMR (125 MHz,  $\text{CDCl}_3$ )  $\delta$  159.0, 158.9, 156.6, 139.4, 134.9, 131.5, 129.4, 129.1, 128.2, 127.37, 127.25, 125.9, 116.9, 114.3, 113.8, 105.6, 96.2, 93.9, 81.8, 80.6, 79.2, 77.2, 74.6, 73.25, 73.20, 72.7, 71.9, 70.8, 55.8, 55.4, 48.2, 43.6, 42.9, 42.2, 38.6, 35.8, 34.8, 34.1, 32.3, 28.9, 26.9, 26.08, 26.02, 25.86, 25.85, 25.76, 25.1, 24.1, 21.5, 21.2, 13.8; IR (neat) 2232, 1738, 1271, 1036,  $734\text{cm}^{-1}$ ; HRMS (ESI)  $m/z$  981.4615  $[(\text{M}+\text{Na})^+]$ ,  $\text{C}_{55}\text{H}_{74}\text{O}_{10}\text{S}_2$  requires 981.4616].

## Preparation of Alcohol 22

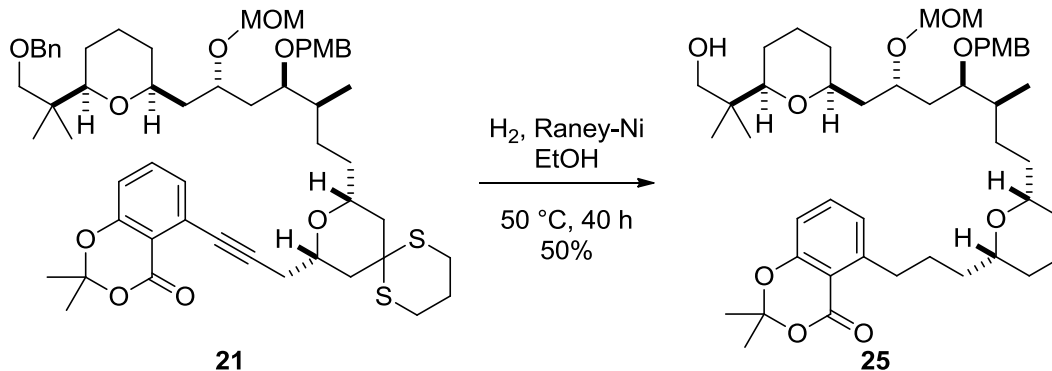

To a stirred solution of coupling product **21** (40 mg, 0.042 mmol) in EtOH (0.5 mL) was added Raney<sup>®</sup> 2400 nickel slurry in EtOH (2 pipets). After stirred under H<sub>2</sub> atmosphere for 40 h at 50 °C, the reaction mixture was then filtered through celite with EtOAc and concentrated *in vacuo*. The residue was purified by column chromatography (silica gel, EtOAc/hexanes, 1/5 to 2/1) to afford alcohol **25** (16 mg, 50%):  $[\alpha]_{\text{D}}^{25} = +26.6$  (*c* 0.2, CHCl<sub>3</sub>); <sup>1</sup>H NMR (500 MHz, CDCl<sub>3</sub>)  $\delta$  7.38 (dd, *J* = 7.5 Hz, 1H), 7.27 (d, *J* = 8.5 Hz, 2H), 6.92 (d, *J* = 7.5 Hz, 1H), 6.86 (d, *J* = 8.5 Hz, 2H), 6.79 (d, *J* = 7.5 Hz, 1H), 4.59 (d, *J* = 7.0 Hz, 1H), 4.50 (d, *J* = 11.5 Hz, 1H), 4.49 (d, *J* = 7.0 Hz, 1H), 4.31 (d, *J* = 11.0 Hz, 1H), 3.87–3.93 (m, 1H), 3.79 (s, 3H), 3.56 (dd, *J* = 10.0, 3.0 Hz, 1H), 3.47 (dd, *J* = 10.5, 5.5 Hz, 1H), 3.31 (s, 3H), 3.17–3.36 (m, 5H), 3.09 (dd, *J* = 7.0 Hz, 2H), 2.95 (dd, *J* = 10.0, 4.0 Hz, 1H), 1.75–1.95 (m, 5H), 1.68 (s, 6H), 1.54–1.67 (m, 6H), 1.36–1.52 (m, 10H), 1.24–1.30 (m, 1H), 1.08–1.20 (m, 3H), 0.86 (s, 3H), 0.86 (d, *J* = 8.0 Hz, 3H), 0.72 (s, 3H); <sup>13</sup>C NMR (125 MHz, CDCl<sub>3</sub>)  $\delta$  160.2, 159.1, 157.1, 148.3, 135.1, 130.8, 129.8, 125.2, 115.1, 113.7, 112.0, 104.9, 96.3, 83.7, 78.9, 78.0, 77.7, 75.4, 73.2, 70.7, 70.2, 55.6, 55.3, 42.2, 38.0, 36.4, 34.81 (2 carbons), 34.27, 34.24, 32.0, 31.69 (2 carbons), 29.1, 27.1, 25.72, 25.62, 25.0, 23.9, 23.7, 22.7, 19.5, 13.4; IR (neat) 3520, 1738, 1038, 751 cm<sup>-1</sup>; HRMS (ESI) *m/z* 791.4702 [(M+Na)<sup>+</sup>, C<sub>45</sub>H<sub>68</sub>O<sub>10</sub> requires 791.4705].

## Preparation of Benzyl Ester 27

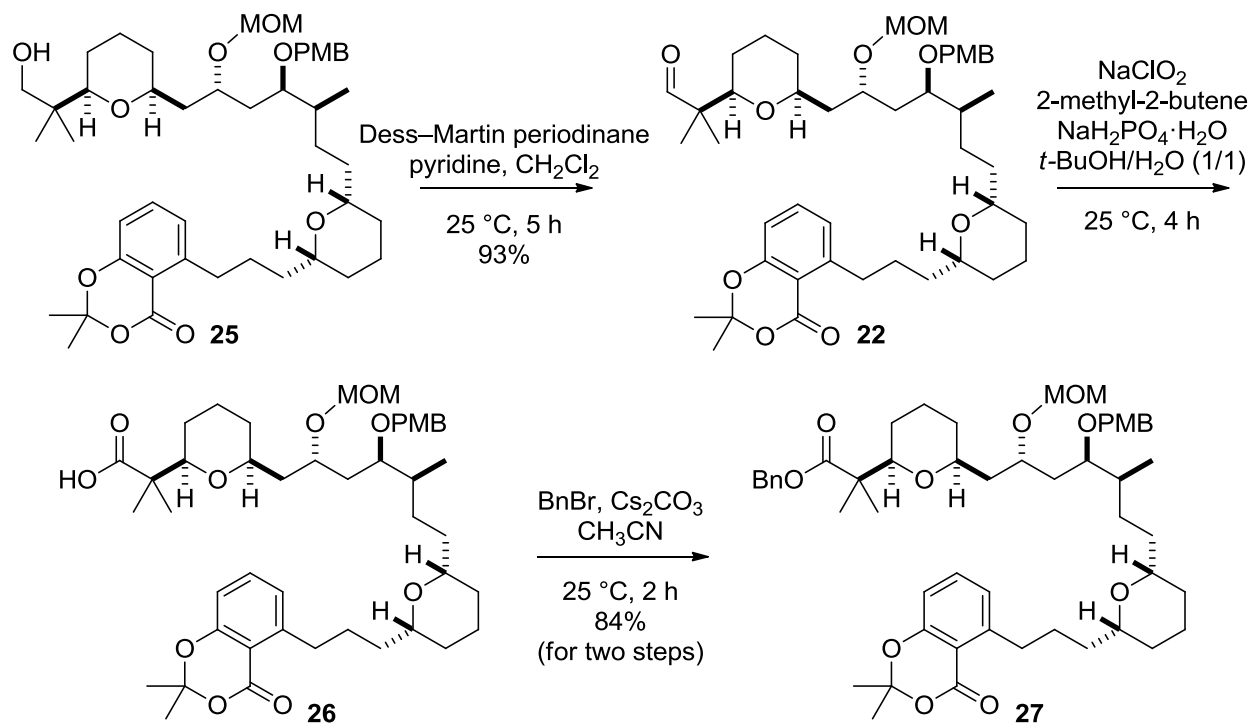

**[Dess–Martin Oxidation]** To a stirred solution of alcohol **25** (16 mg, 0.021 mmol) in  $\text{CH}_2\text{Cl}_2$  (1 mL) were added pyridine (3.4  $\mu\text{L}$ , 0.042 mmol) and Dess–Martin periodinane (13 mg, 0.032 mmol) at 25 °C. After stirred for 5 h, the reaction mixture was quenched with addition of saturated aqueous  $\text{Na}_2\text{S}_2\text{O}_3$  and saturated aqueous  $\text{NaHCO}_3$ . The layers were separated, and the aqueous layer was extracted with  $\text{CH}_2\text{Cl}_2$ . The combined organic layers were dried over anhydrous  $\text{Na}_2\text{SO}_4$  and concentrated *in vacuo*. The residue was purified by column chromatography (silica gel, EtOAc/ hexanes, 1/2) to afford aldehyde **22** (15 mg, 93%):  $^1\text{H}$  NMR (500 MHz,  $\text{CDCl}_3$ )  $\delta$  9.53 (s, 1H), 7.38 (dd,  $J$  = 7.5 Hz, 1H), 7.26 (d,  $J$  = 9.0 Hz, 2H), 6.93 (d,  $J$  = 7.0 Hz, 1H), 6.86 (d,  $J$  = 9.0 Hz, 2H), 6.79 (dd,  $J$  = 8.0, 1.0 Hz, 1H), 4.58 (d,  $J$  = 6.0 Hz, 1H), 4.50 (d,  $J$  = 10.5 Hz, 1H), 4.48 (d,  $J$  = 8.0 Hz, 1H), 4.30 (d,  $J$  = 11.5 Hz, 1H), 3.83–3.89 (m, 1H), 3.79 (s, 3H), 3.48–3.53 (m, 1H), 3.32 (s, 3H), 3.24–3.40 (m, 3H), 3.17–3.23 (m, 1H), 3.09 (dd,  $J$

= 7.0 Hz, 2H), 1.71–1.94 (m, 5H), 1.69 (s, 3H), 1.68 (s, 3H), 1.54–1.67 (m, 4H), 1.36–1.52 (m, 11H), 1.08–1.23 (m, 5H), 1.00 (s, 3H), 0.99 (s, 3H), 0.87 (d,  $J$  = 7.0 Hz, 3H).

**[Oxidation to Carboxylic Acid]** To a solution of aldehyde **22** (15 mg, 0.019 mmol) in *t*-BuOH/H<sub>2</sub>O (1/1, 2 mL) were added 2-methyl-2-butene (83  $\mu$ L, 0.782 mmol), sodium phosphate monobasic monohydrate (5.2 mg, 0.038 mmol), and sodium chlorite (3.5 mg, 0.038 mmol) at 25 °C. After stirred for 4 h at 25 °C, the reaction mixture was diluted with EtOAc and H<sub>2</sub>O. The layers were separated, and the aqueous layer was extracted with EtOAc. The combined organic layers were dried over anhydrous Na<sub>2</sub>SO<sub>4</sub> and concentrated *in vacuo* to afford the crude carboxylic acid **26**, which was employed in the next step without further purification.

**[Esterification]** To a solution of carboxylic acid **26** in CH<sub>3</sub>CN (1 mL) were added Cs<sub>2</sub>CO<sub>3</sub> (31 mg, 0.095 mmol) and benzyl bromide (23  $\mu$ L, 0.190 mmol) at 25 °C. After stirred for 2 h at 25 °C, the reaction mixture was quenched with addition of saturated aqueous NH<sub>4</sub>Cl solution and diluted with EtOAc. The layers were separated, and the aqueous layer was extracted with EtOAc. The combined organic layers were dried over anhydrous Na<sub>2</sub>SO<sub>4</sub> and concentrated *in vacuo*. The residue was purified by column chromatography (silica gel, EtOAc/hexanes, 1/5) to afford benzyl ester **27** (14 mg, 84% for two steps):  $[\alpha]_D^{25}$  = +14.1 ( $c$  0.15, CHCl<sub>3</sub>); <sup>1</sup>H NMR (500 MHz, CDCl<sub>3</sub>)  $\delta$  7.37 (dd,  $J$  = 7.5 Hz, 1H), 7.28–7.35 (m, 5H), 7.24 (d,  $J$  = 8.0 Hz, 2H), 6.92 (d,  $J$  = 7.5 Hz, 1H), 6.86 (d,  $J$  = 8.5 Hz, 2H), 6.78 (d,  $J$  = 7.5 Hz, 1H), 5.07 (s, 2H), 4.58 (d,  $J$  = 7.0 Hz, 1H), 4.50 (d,  $J$  = 6.5 Hz, 1H), 4.48 (d,  $J$  = 12.5 Hz, 1H), 4.30 (d,  $J$  = 11.5 Hz, 1H), 3.85–3.91 (m, 1H), 3.77 (s, 3H), 3.49–3.54 (m, 1H), 3.45 (dd,  $J$  = 11.0, 1.5 Hz, 1H), 3.35–3.41 (m, 1H), 3.32 (s, 3H), 3.24–3.29 (m, 1H), 3.17–3.22 (m, 1H), 3.09 (dd,  $J$  = 7.0 Hz, 2H), 1.85–1.92 (m, 1H), 1.74–1.82 (m, 3H), 1.69 (s, 6H), 1.32–1.64 (m, 16H), 1.08–1.24 (m, 5H), 1.19 (s, 3H), 1.11 (s, 3H), 0.86 (d,  $J$  = 7.0 Hz, 3H); <sup>13</sup>C NMR (125 MHz, CDCl<sub>3</sub>)  $\delta$  176.7, 160.4, 159.1, 157.3, 148.3, 136.7, 135.3, 131.5, 129.4, 128.6, 128.00, 127.91, 125.3, 115.3, 113.8, 112.2, 105.1, 96.3, 82.1, 79.3, 78.2,

77.9, 75.0, 73.2, 70.7, 66.1, 55.8, 55.4, 46.9, 42.9, 36.6, 35.9, 35.0, 34.7, 34.4, 32.01, 31.82 (2 carbons), 29.2, 27.3, 25.85, 25.76, 25.70, 23.90, 23.82, 22.2, 20.3, 13.8; IR (neat) 1737, 1513, 1389, 1039, 669  $\text{cm}^{-1}$ ; HRMS (ESI)  $m/z$  895.4966  $[(M+Na)^+]$ ,  $\text{C}_{52}\text{H}_{72}\text{O}_{11}$  requires 895.4967].

### Preparation of **2**

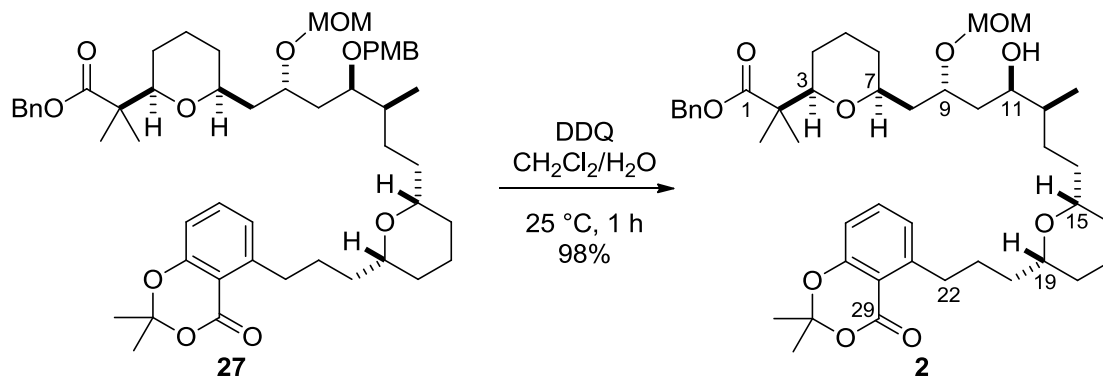

To a cooled (0  $^\circ\text{C}$ ) solution of benzyl ester **27** (14 mg, 0.016 mmol) in  $\text{CH}_2\text{Cl}_2/\text{H}_2\text{O}$  (10:1, 1.1 mL) was added DDQ (11 mg, 0.048 mmol). After stirred for 1 h at 25  $^\circ\text{C}$ , the reaction mixture was quenched with addition of saturated aqueous  $\text{NaHCO}_3$  solution. The layers were separated, and the aqueous layer was extracted with  $\text{CH}_2\text{Cl}_2$ . The combined organic layers were dried over anhydrous  $\text{Na}_2\text{SO}_4$  and concentrated *in vacuo*. The residue was purified by column chromatography (silica gel, EtOAc/hexanes, 1/5) to **2** (12 mg, 98%):  $[\alpha]_{\text{D}}^{25} = +7.9$  ( $c$  0.07,  $\text{CHCl}_3$ );  $^1\text{H}$  NMR (500 MHz,  $\text{CDCl}_3$ )  $\delta$  7.38 (t,  $J = 8.0$  Hz, 1H), 7.27–7.35 (m, 5H), 6.93 (d,  $J = 7.5$  Hz, 1H), 6.78 (d,  $J = 8.5$  Hz, 1H), 5.12 (s, 2H), 4.61 (d,  $J = 6.0$  Hz, 1H), 4.58 (d,  $J = 6.5$  Hz, 1H), 3.92–3.98 (m, 1H), 3.63–3.68 (m, 1H), 3.50 (d,  $J = 10.0$  Hz, 1H), 3.17–3.37 (m, 3H), 3.35 (s, 3H), 3.06–3.13 (m, 2H), 2.94 (d,  $J = 4.0$  Hz, 1H), 1.74–1.88 (m, 3H), 1.69 (s, 6H), 1.38–1.65 (m, 16H), 1.07–1.28 (m, 6H), 1.20 (s, 3H), 1.12 (s, 3H), 0.86 (d,  $J = 6.5$  Hz, 3H);  $^{13}\text{C}$  NMR (125 MHz,  $\text{CDCl}_3$ )  $\delta$  176.9, 160.4, 157.3, 148.4, 136.6, 135.2, 128.6, 128.1, 127.9, 125.4, 115.3, 112.2, 105.1, 96.2, 82.4, 78.4, 77.8, 75.1, 73.6, 71.7, 66.3, 55.9, 46.9, 41.3, 39.1, 37.2, 36.6, 34.4,

34.3, 32.0, 31.9, 31.7, 28.3, 27.3, 25.9, 25.8, 25.3, 23.9, 23.8, 21.3, 20.7, 15.3; IR (neat) 3521, 1733, 1456, 1038, 734  $\text{cm}^{-1}$ ; HRMS (ESI)  $m/z$  775.4390  $[(M+Na)^+]$ ,  $\text{C}_{44}\text{H}_{64}\text{O}_{10}$  requires 775.4392].

Table 1. Comparison of  $^1\text{H}$  NMR data for **2** ( $\text{CDCl}_3$ )<sup>1</sup>

| Carbon #  | chemical shifts ( $\delta$ ) |                | Carbon #                                | chemical shifts ( $\delta$ ) |                |
|-----------|------------------------------|----------------|-----------------------------------------|------------------------------|----------------|
|           | De Brabander (400 MHz)       | Hong (500 MHz) |                                         | De Brabander (400 MHz)       | Hong (500 MHz) |
| <b>1</b>  | –                            | –              | <b>20</b>                               | 1.39–1.65 (m)                | 1.38–1.65 (m)  |
| <b>2</b>  | –                            | –              | <b>21</b>                               | 1.74–1.88 (m)                | 1.74–1.88 (m)  |
| <b>3</b>  | 3.51 (d)                     | 3.50 (d)       |                                         | 1.07–1.28 (m)                | 1.06–1.28 (m)  |
| <b>4</b>  | 1.39–1.65 (m)                | 1.38–1.65 (m)  | <b>22</b>                               | 3.06–3.13 (m)                | 3.06–3.13 (m)  |
| <b>5</b>  | 1.74–1.88 (m)                | 1.74–1.88 (m)  | <b>23</b>                               | –                            | –              |
|           | 1.39–1.65 (m)                | 1.38–1.65 (m)  | <b>24</b>                               | 6.78 (d)                     | 6.78 (d)       |
| <b>6</b>  | 1.39–1.65 (m)                | 1.38–1.65 (m)  | <b>25</b>                               | 7.28 (t)                     | 7.38 (t)       |
|           | 1.07–1.28 (m)                | 1.06–1.28 (m)  | <b>26</b>                               | 6.93 (d)                     | 6.93 (d)       |
| <b>7</b>  | 3.17–3.40 (m)                | 3.17–3.37 (m)  | <b>27</b>                               | –                            | –              |
| <b>8</b>  | 1.39–1.65 (m)                | 1.38–1.65 (m)  | <b>28</b>                               | –                            | –              |
| <b>9</b>  | 3.90–4.00 (m)                | 3.92–3.98 (m)  | <b>29</b>                               | –                            | –              |
| <b>10</b> | 1.39–1.65 (m)                | 1.38–1.65 (m)  | <b>30</b>                               | –                            | –              |
| <b>11</b> | 3.63–3.69 (m)                | 3.63–3.68 (m)  | <b>1-OCH<sub>2</sub>Ph</b>              | 7.27–7.40 (m)                | 7.27–7.35 (m)  |
| <b>12</b> | 1.39–1.65 (m)                | 1.38–1.65 (m)  | <b>1-OCH<sub>2</sub>Ph</b>              | 4.58 (d)                     | 4.58 (d)       |
| <b>13</b> | 1.39–1.65 (m)                | 1.38–1.65 (m)  | <b>1-OCH<sub>2</sub>Ph</b>              | 4.61 (d)                     | 4.61 (d)       |
|           | 1.07–1.28 (m)                | 1.06–1.28 (m)  | <b>2-Me</b>                             | 1.12 (s)                     | 1.12 (s)       |
| <b>14</b> | 1.07–1.28 (m)                | 1.06–1.28 (m)  | <b>2-Me</b>                             | 1.20 (s)                     | 1.20 (s)       |
| <b>15</b> | 3.17–3.40 (m)                | 3.17–3.37 (m)  | <b>9-OCH<sub>2</sub>OCH<sub>3</sub></b> | 5.12 (s)                     | 5.12 (s)       |
| <b>16</b> | 1.39–1.65 (m)                | 1.38–1.65 (m)  | <b>9-OCH<sub>2</sub>OCH<sub>3</sub></b> | 3.35 (s)                     | 3.35 (s)       |
| <b>17</b> | 1.39–1.65 (m)                | 1.38–1.65 (m)  | <b>11-OH</b>                            | 2.95 (m)                     | 2.94 (d)       |
|           | 1.74–1.88 (m)                | 1.74–1.88 (m)  | <b>12-Me</b>                            | 0.86 (d)                     | 0.86 (d)       |
| <b>18</b> | 1.39–1.65 (m)                | 1.38–1.65 (m)  | <b>30-Me</b>                            | 1.69 (s)                     | 1.69 (s)       |
|           | 1.07–1.28 (m)                | 1.06–1.28 (m)  | <b>30-Me</b>                            | 1.69 (s)                     | 1.69 (s)       |
| <b>19</b> | 3.17–3.40 (m)                | 3.17–3.37 (m)  |                                         |                              |                |

<sup>1</sup>Chemical shifts of methylenes in the upfield region may be interchangeable.

Table 2. Comparison of  $^{13}\text{C}$  NMR data for **2** ( $\text{CDCl}_3$ )

| Carbon<br>#            | chemical shifts ( $\delta$ ) |                   | Carbon<br>#                             | chemical shifts ( $\delta$ ) |                   |
|------------------------|------------------------------|-------------------|-----------------------------------------|------------------------------|-------------------|
|                        | De Brabander<br>(100 MHz)    | Hong<br>(125 MHz) |                                         | De Brabander<br>(100 MHz)    | Hong<br>(125 MHz) |
| <b>1</b>               | 176.9                        | 176.9             | <b>22</b>                               | 34.4                         | 34.4              |
| <b>2</b>               | 46.9                         | 46.9              | <b>23</b>                               | 148.4                        | 148.4             |
| <b>3</b>               | 82.4                         | 82.4              | <b>24</b>                               | 125.4                        | 125.4             |
| <b>4</b>               | 36.6                         | 36.6              | <b>25</b>                               | 135.3                        | 135.2             |
| <b>5</b>               | 23.8                         | 23.8              | <b>26</b>                               | 115.3                        | 115.3             |
| <b>6</b>               | 32.0                         | 32.0              | <b>27</b>                               | 112.2                        | 112.2             |
| <b>7</b> <sup>1</sup>  | 75.2                         | 75.1              | <b>28</b>                               | 160.4                        | 160.4             |
| <b>8</b>               | 41.4                         | 41.3              | <b>29</b>                               | 157.3                        | 157.3             |
| <b>9</b>               | 73.6                         | 73.6              | <b>30</b>                               | 105.1                        | 105.1             |
| <b>10</b>              | 39.1                         | 39.1              | <b>1-OCH<sub>2</sub>Ph</b>              | 136.6                        | 136.6             |
| <b>11</b>              | 71.7                         | 71.7              |                                         | 128.6                        | 128.6             |
| <b>12</b>              | 37.2                         | 37.2              |                                         | 128.1                        | 128.1             |
| <b>13</b>              | 27.3                         | 27.3              |                                         | 127.9                        | 127.9             |
| <b>14</b>              | 25.3                         | 25.3              | <b>1-OCH<sub>2</sub>Ph</b>              | 66.3                         | 66.3              |
| <b>15</b> <sup>1</sup> | 77.8                         | 77.8              | <b>2-Me</b>                             | 21.4                         | 21.3              |
| <b>16</b>              | 31.9                         | 31.9              | <b>2-Me</b>                             | 20.7                         | 20.7              |
| <b>17</b>              | 23.9                         | 23.9              | <b>9-OCH<sub>2</sub>OCH<sub>3</sub></b> | 96.2                         | 96.2              |
| <b>18</b>              | 31.7                         | 31.7              | <b>9-OCH<sub>2</sub>OCH<sub>3</sub></b> | 56.0                         | 55.9              |
| <b>19</b> <sup>1</sup> | 78.5                         | 78.4              | <b>12-Me</b>                            | 15.3                         | 15.3              |
| <b>20</b>              | 34.3                         | 34.3              | <b>30-Me</b>                            | 25.9                         | 25.9              |
| <b>21</b>              | 28.4                         | 28.3              | <b>30-Me</b>                            | 25.8                         | 25.8              |

<sup>1</sup>Chemical shifts may be interchangeable.

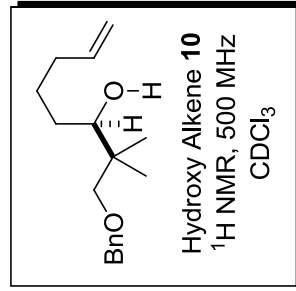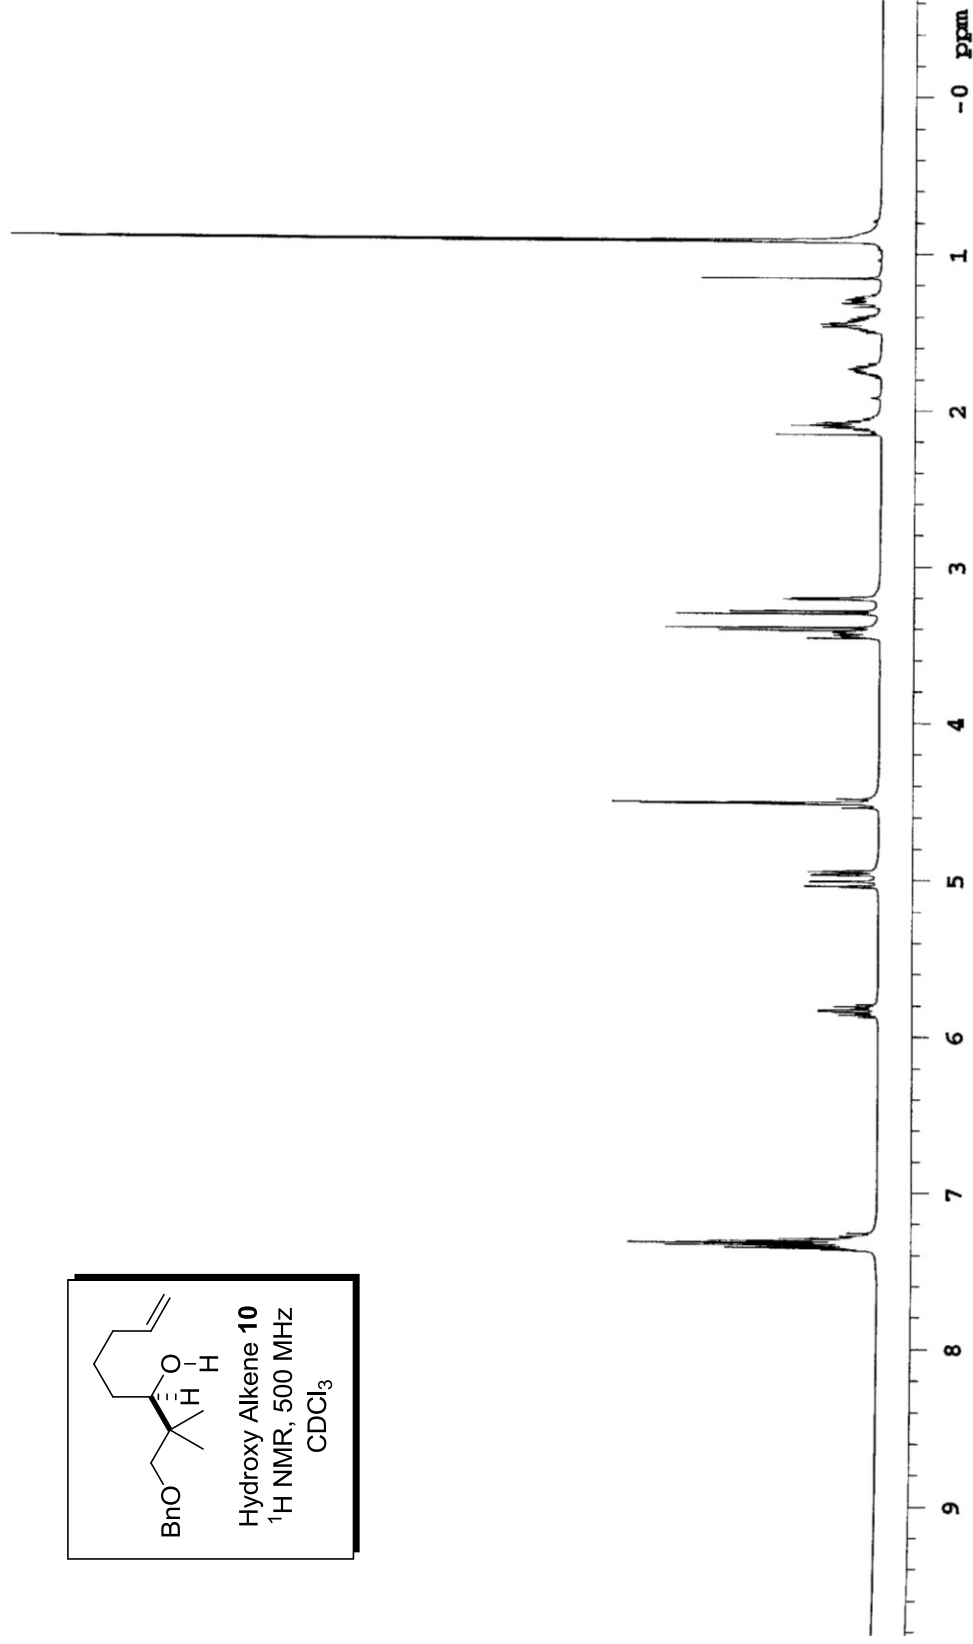

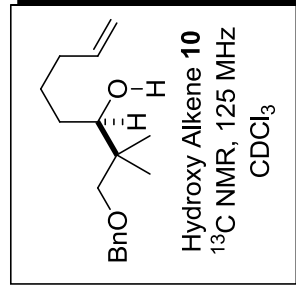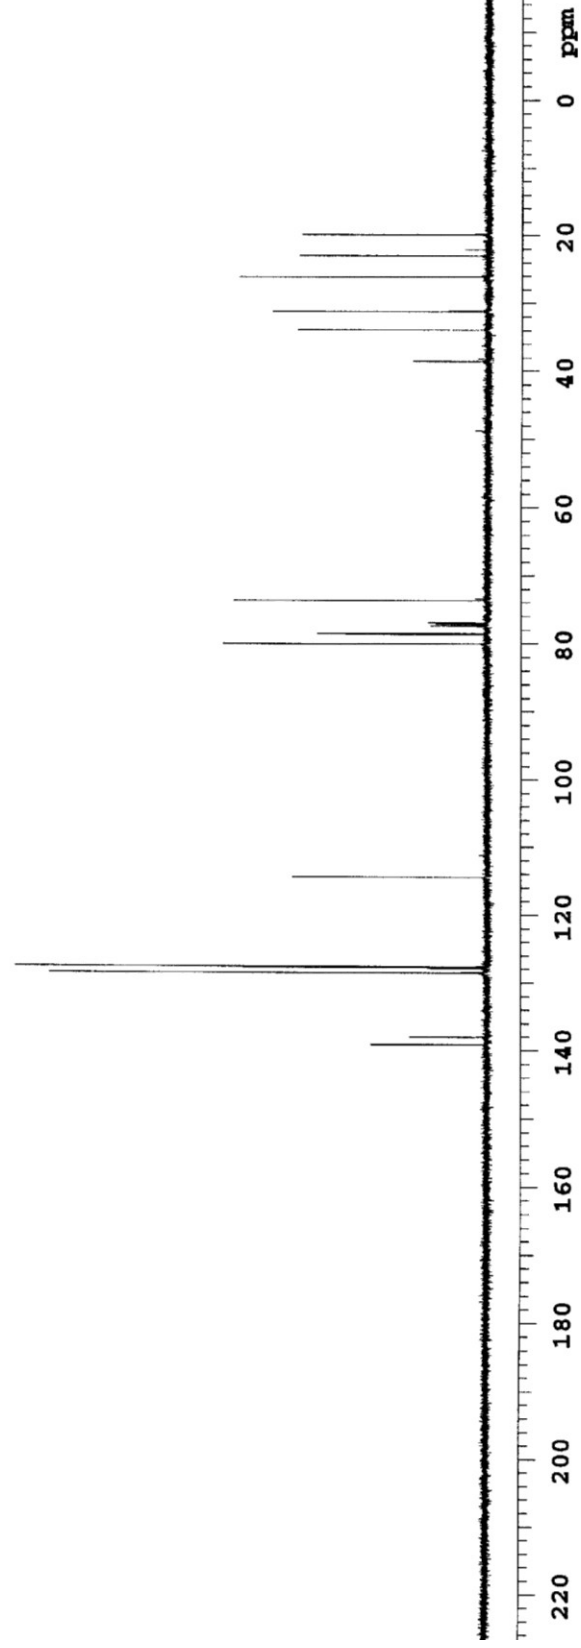

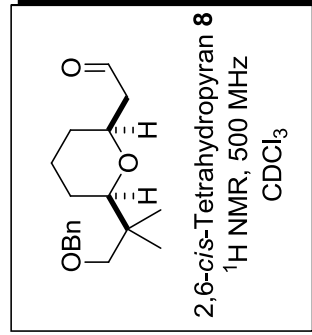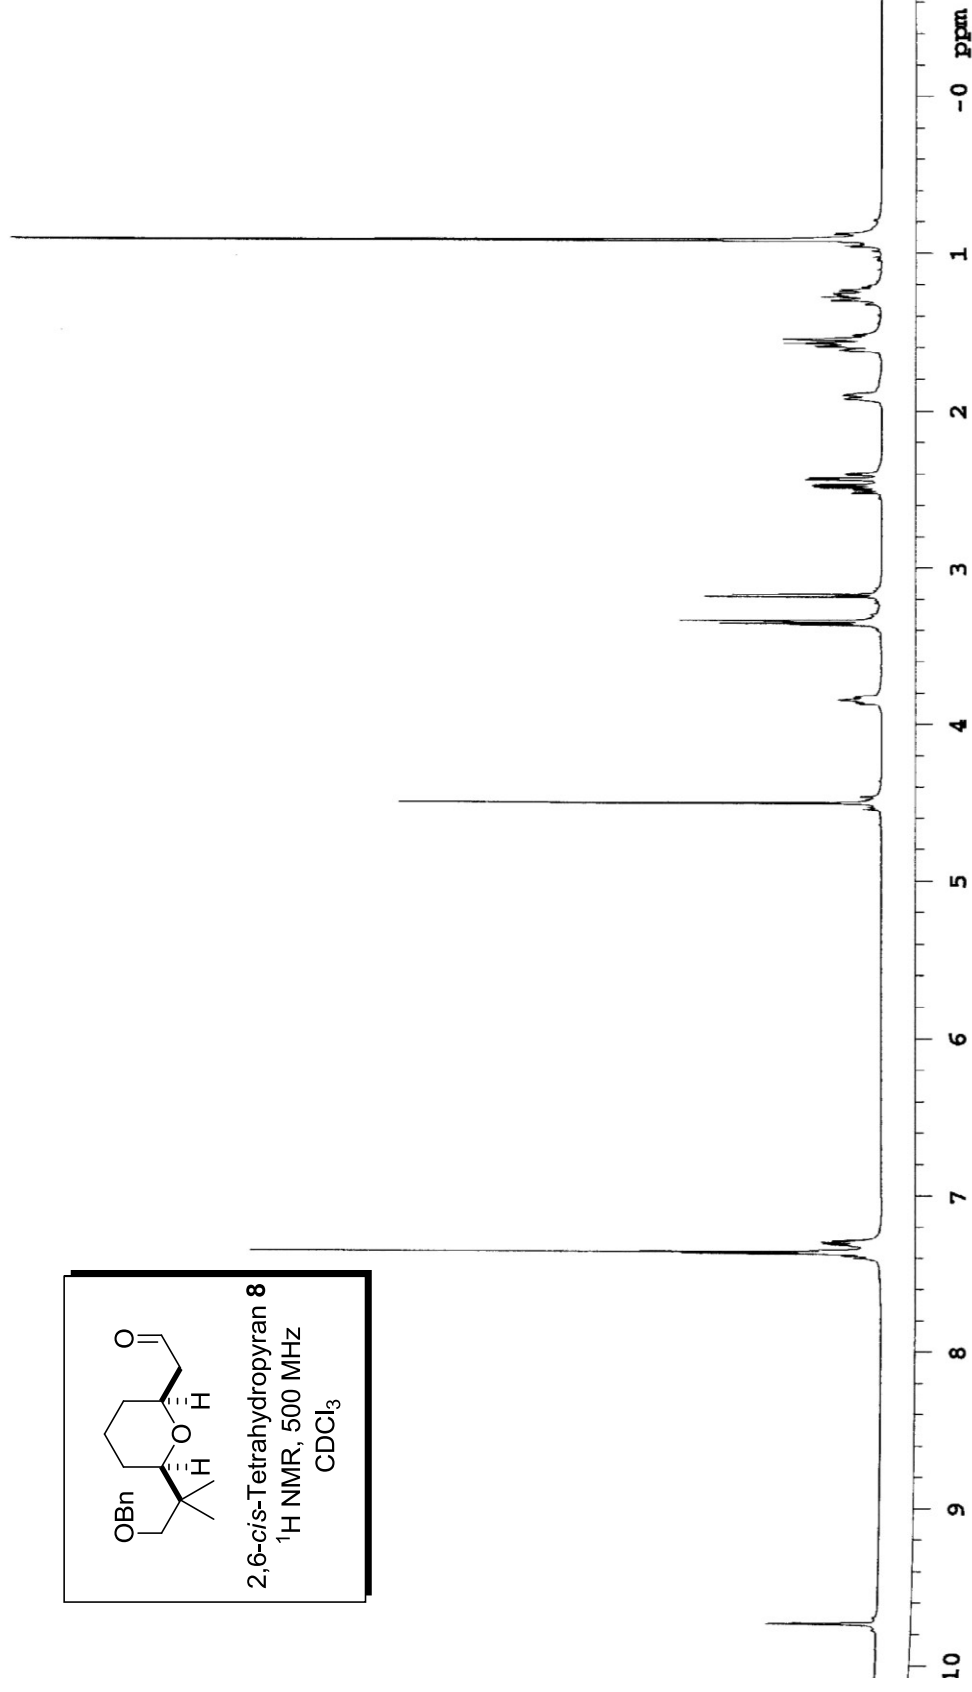

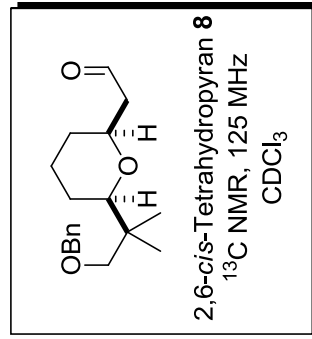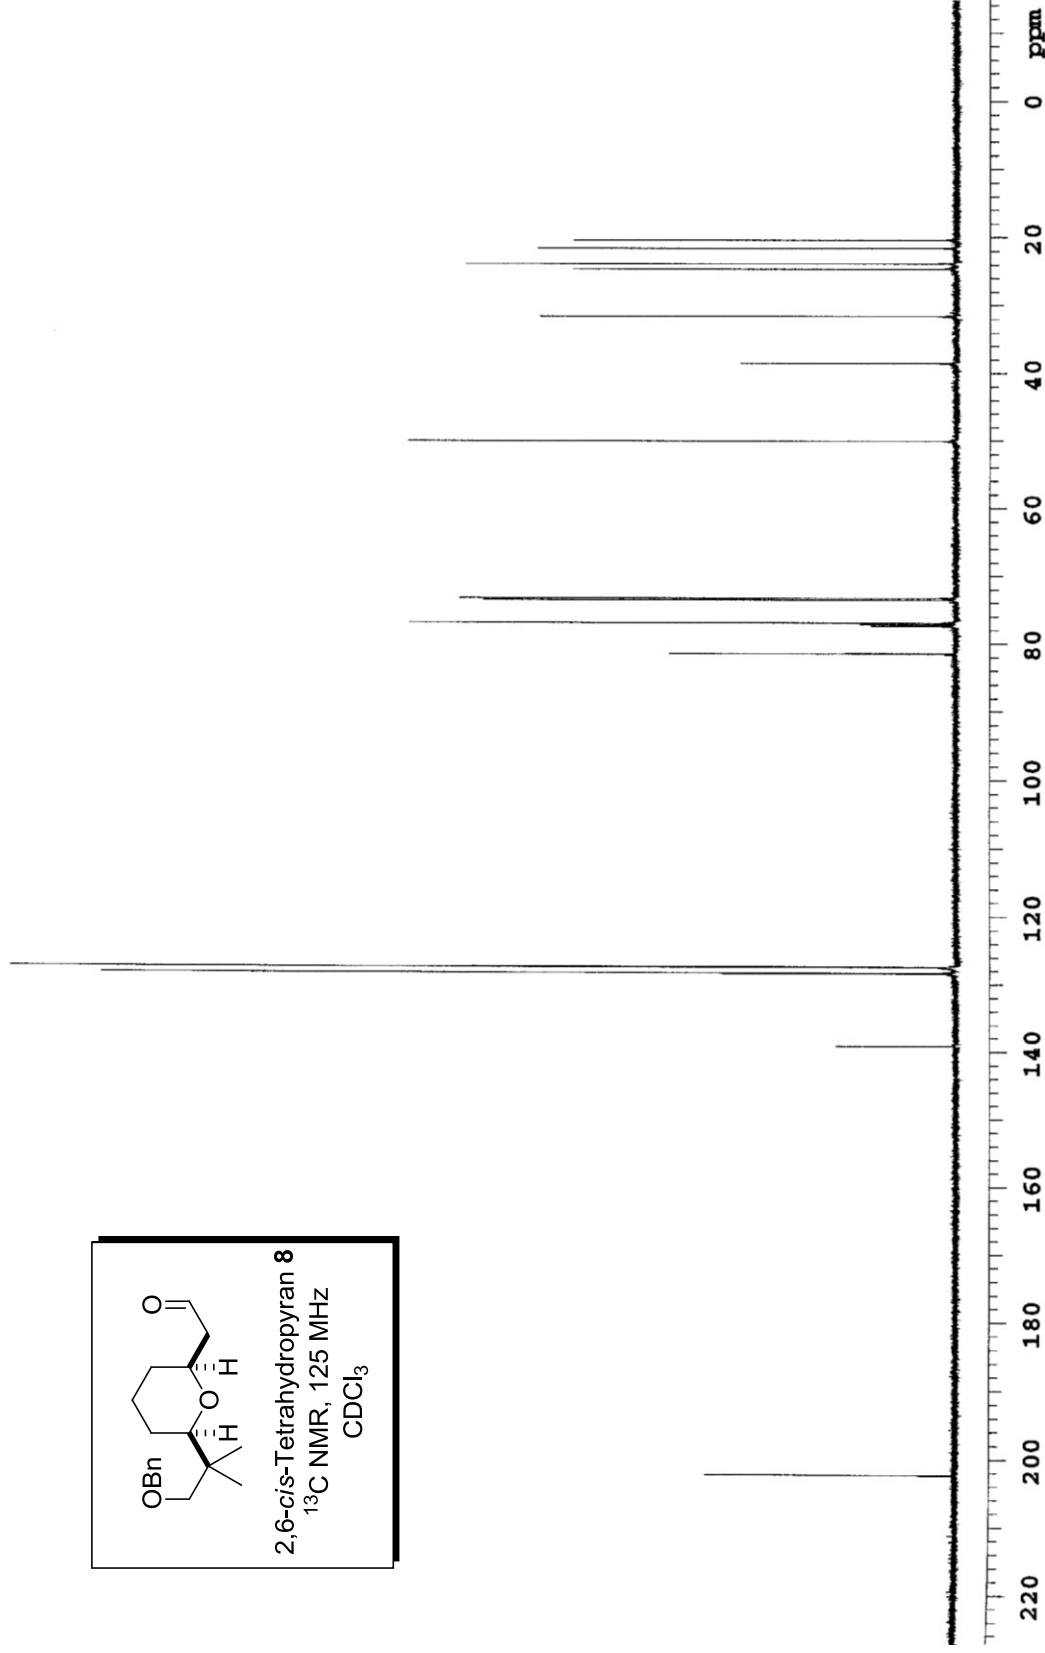

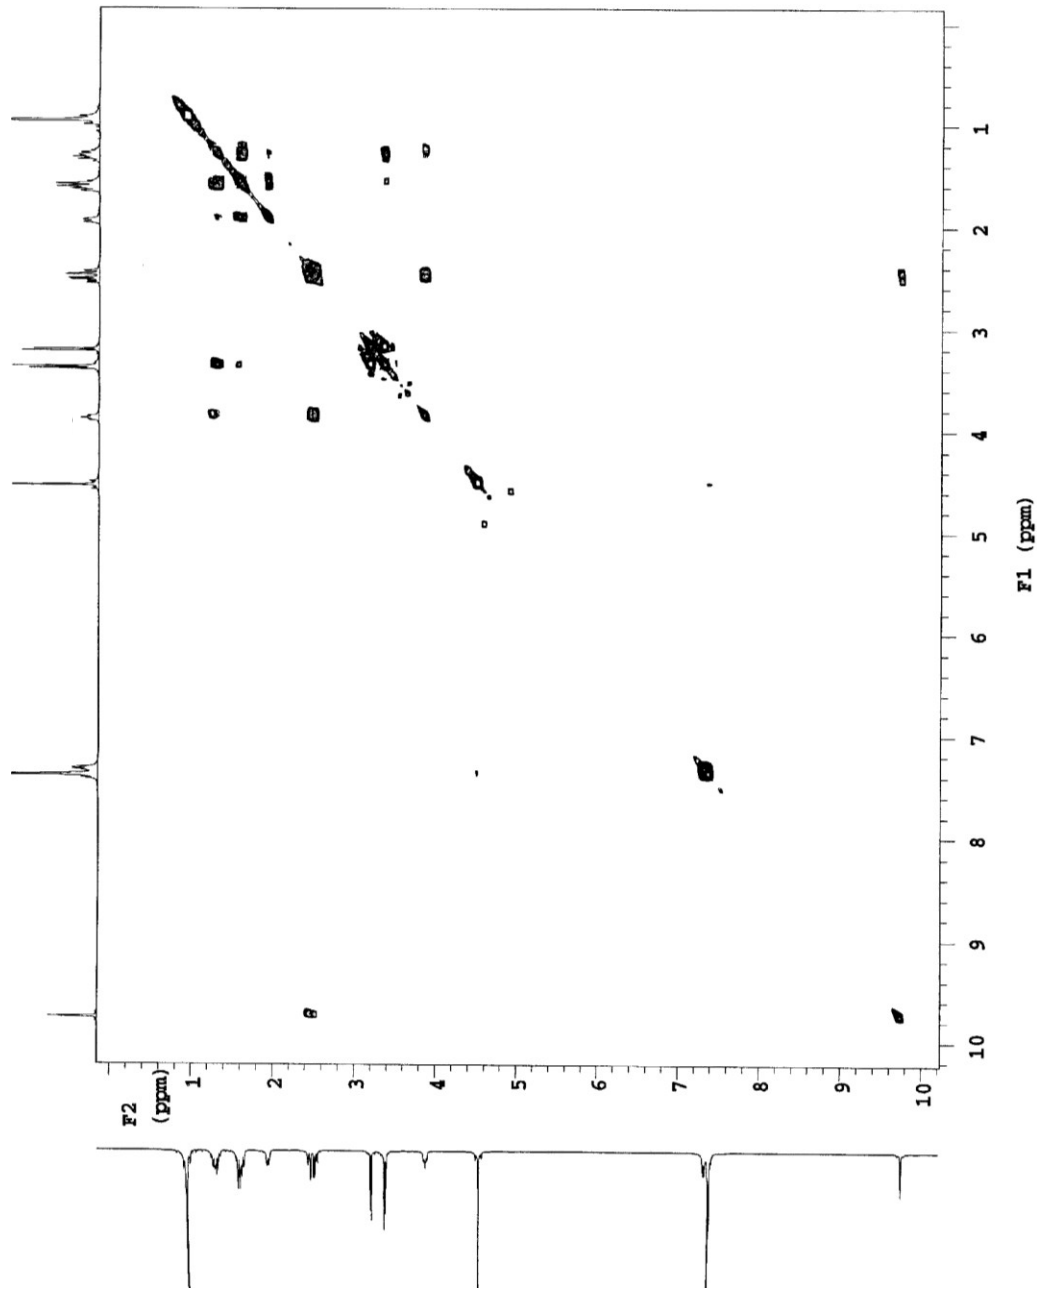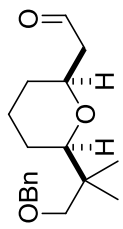

2,6-*cis*-Tetrahydropyran **8**  
 $^1\text{H}$ - $^1\text{H}$  COSY NMR, 500 MHz  
 $\text{CDCl}_3$

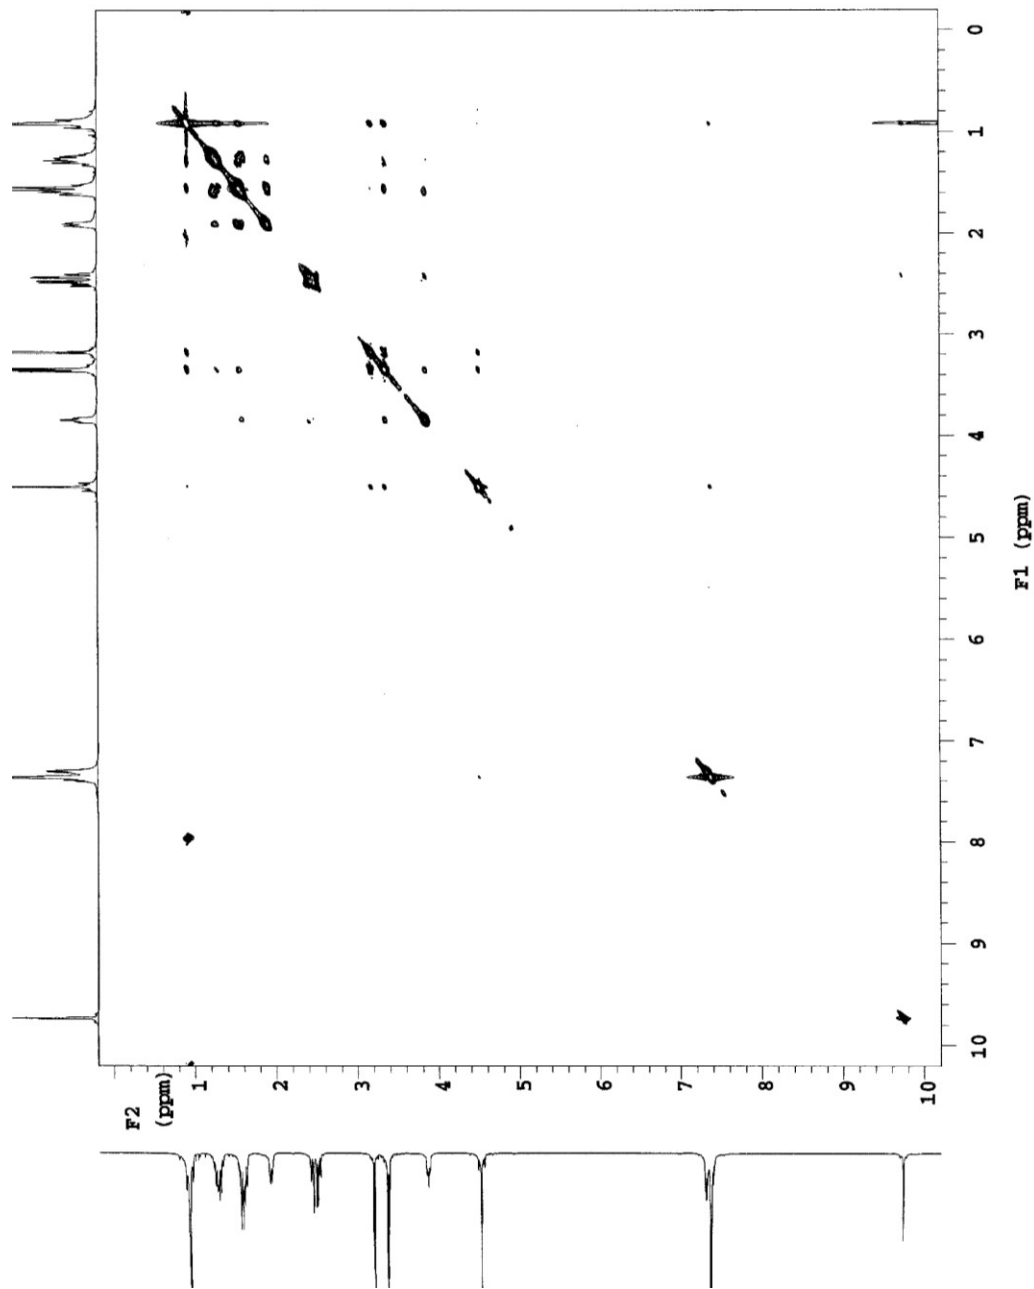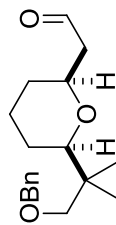

2,6-*cis*-Tetrahydropyran **8**  
 $^1\text{H}$ - $^1\text{H}$  NOESY NMR, 500 MHz  
 $\text{CDCl}_3$

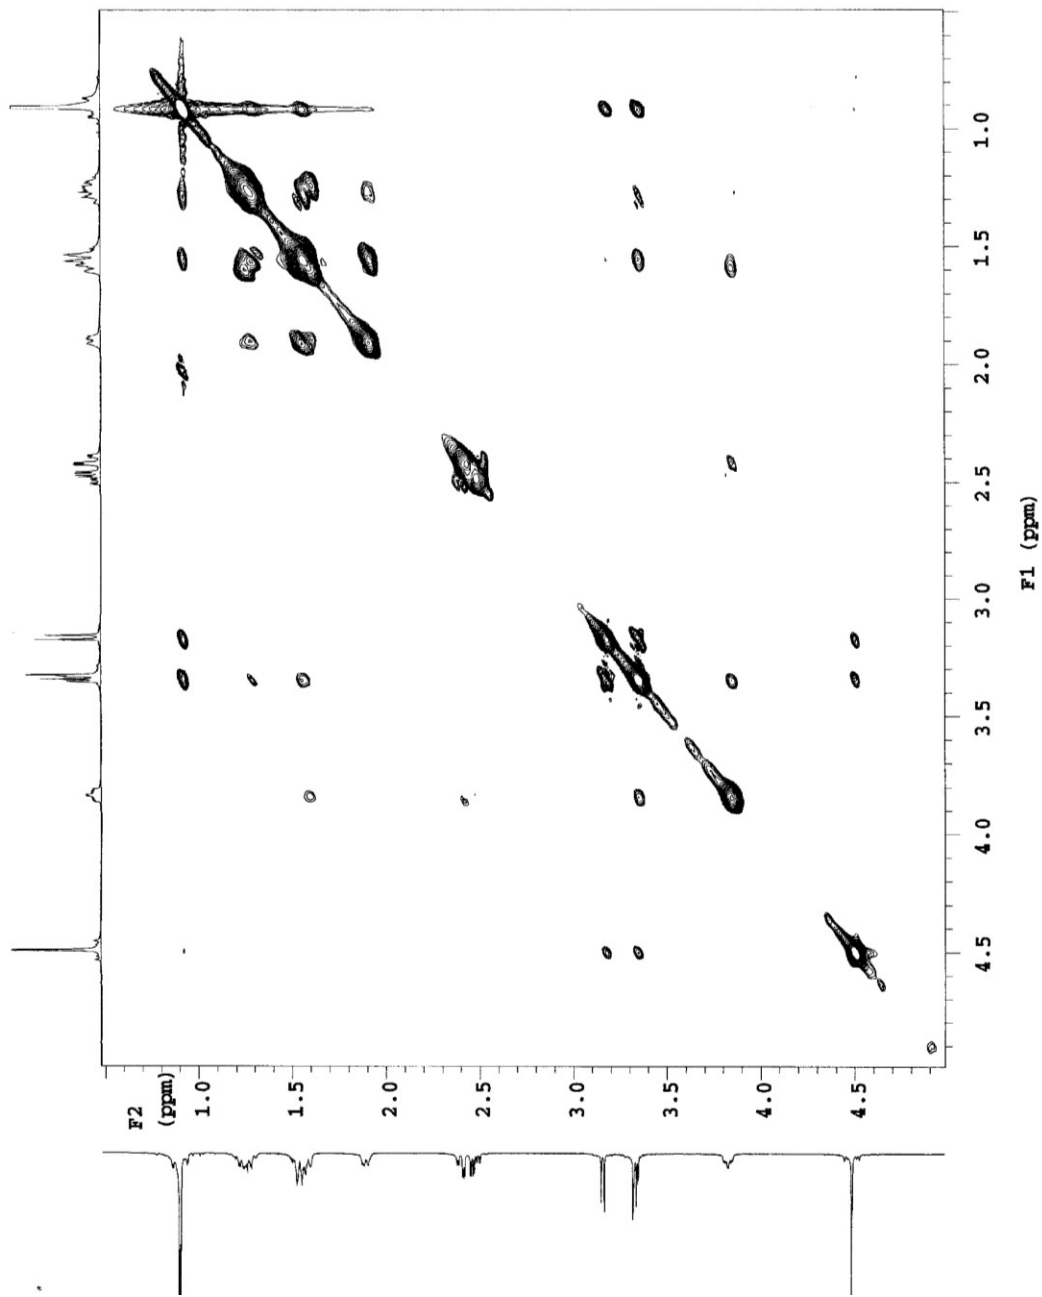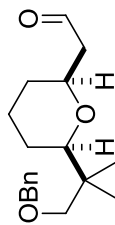

2,6-*cis*-Tetrahydropyran **8**  
 $^1\text{H}$ - $^1\text{H}$  NOESY NMR, 500 MHz  
 $\text{CDCl}_3$

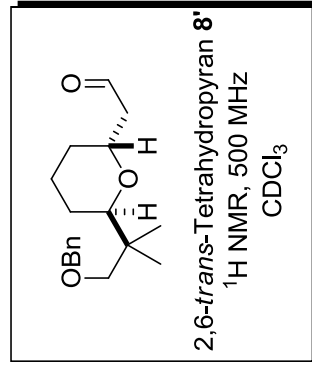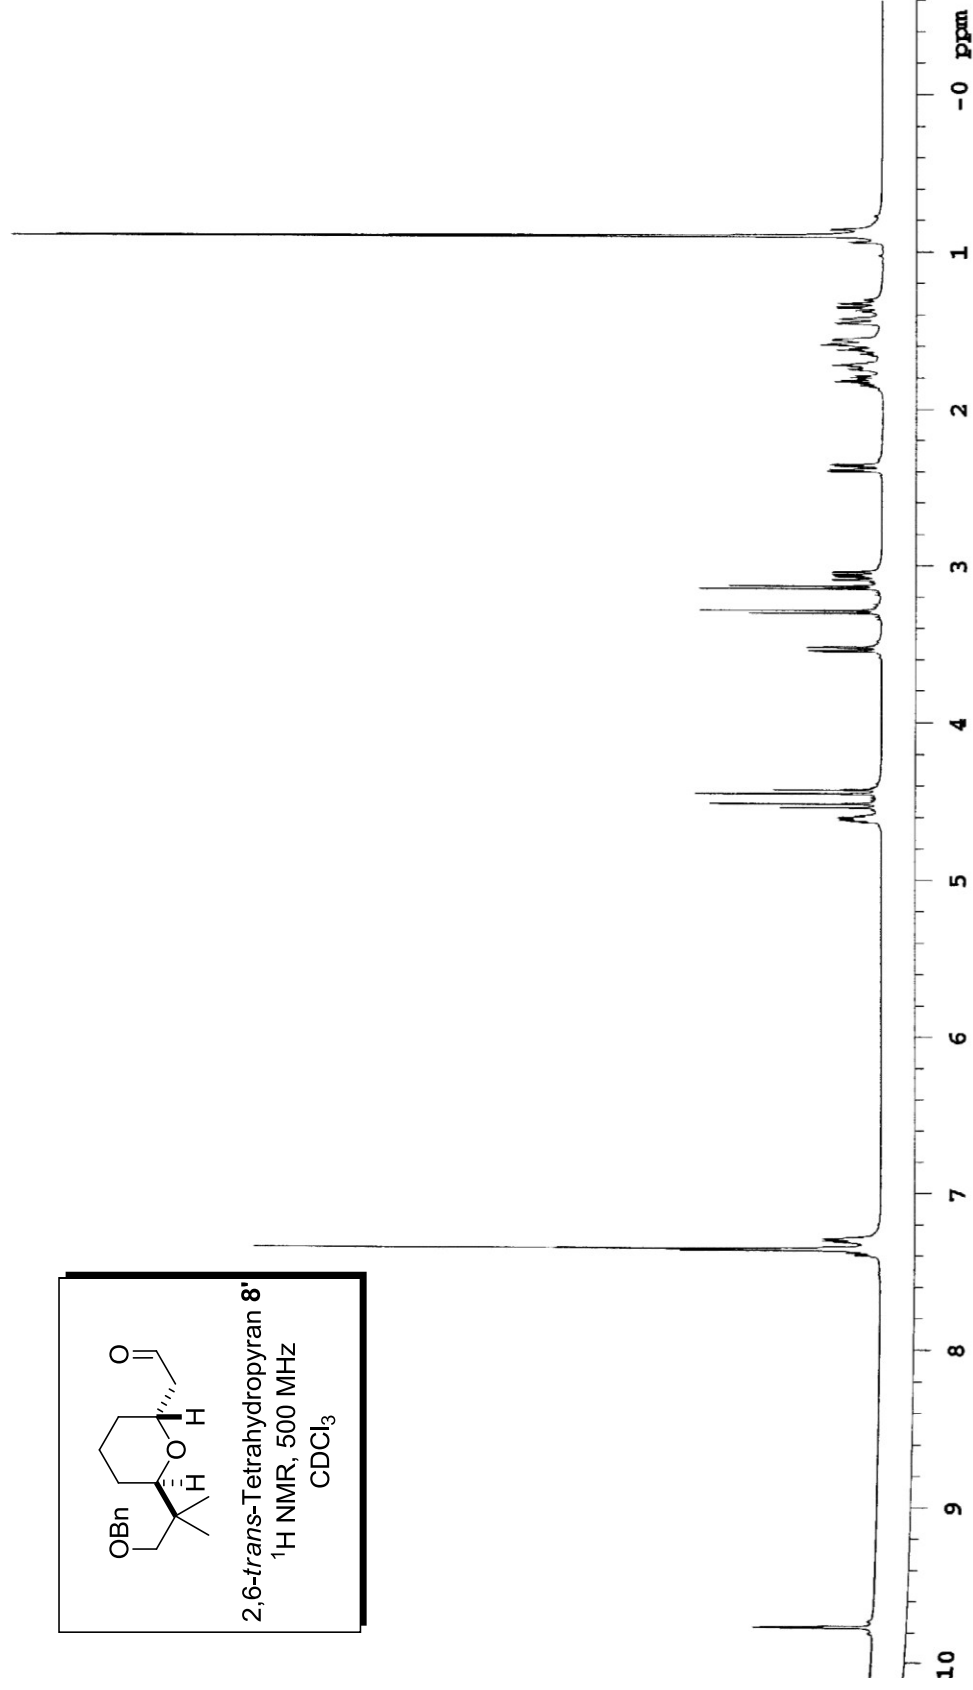

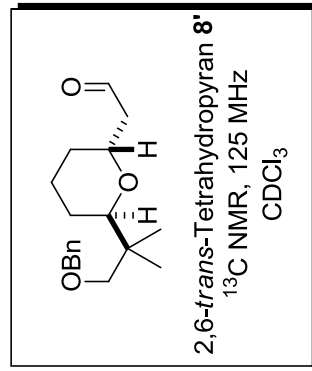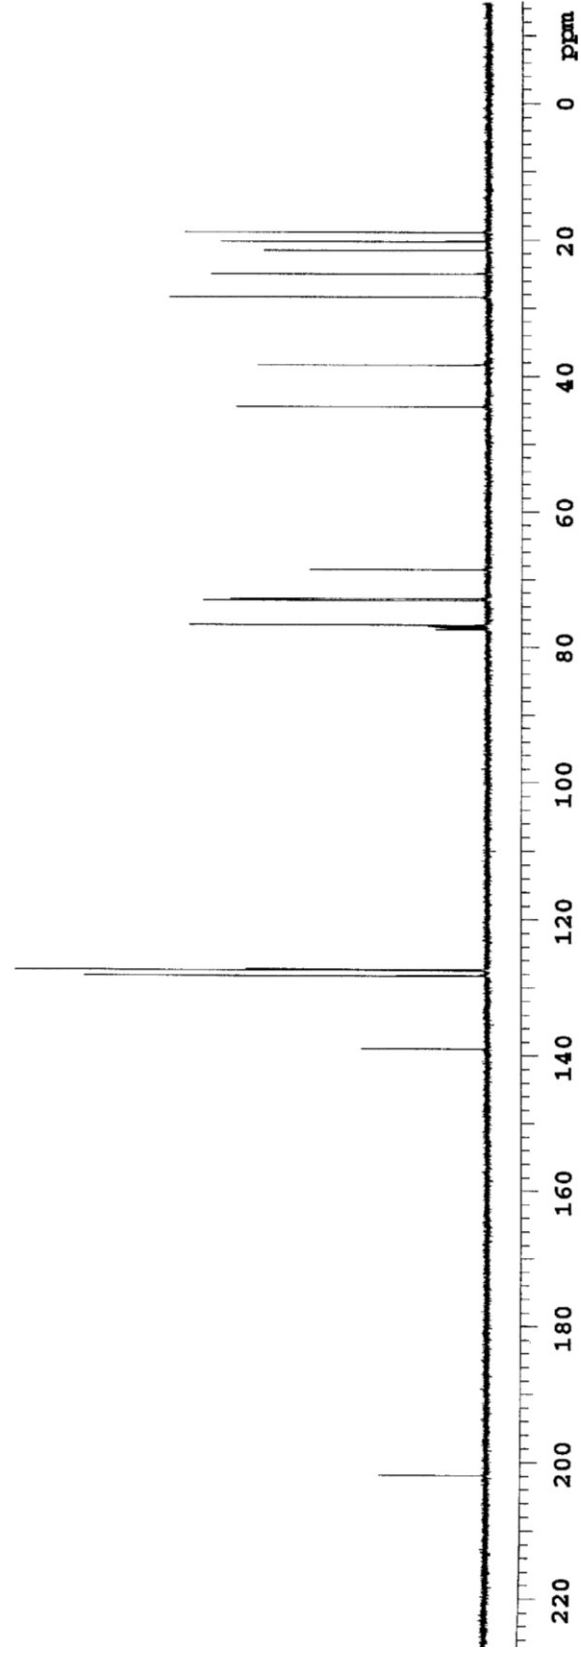

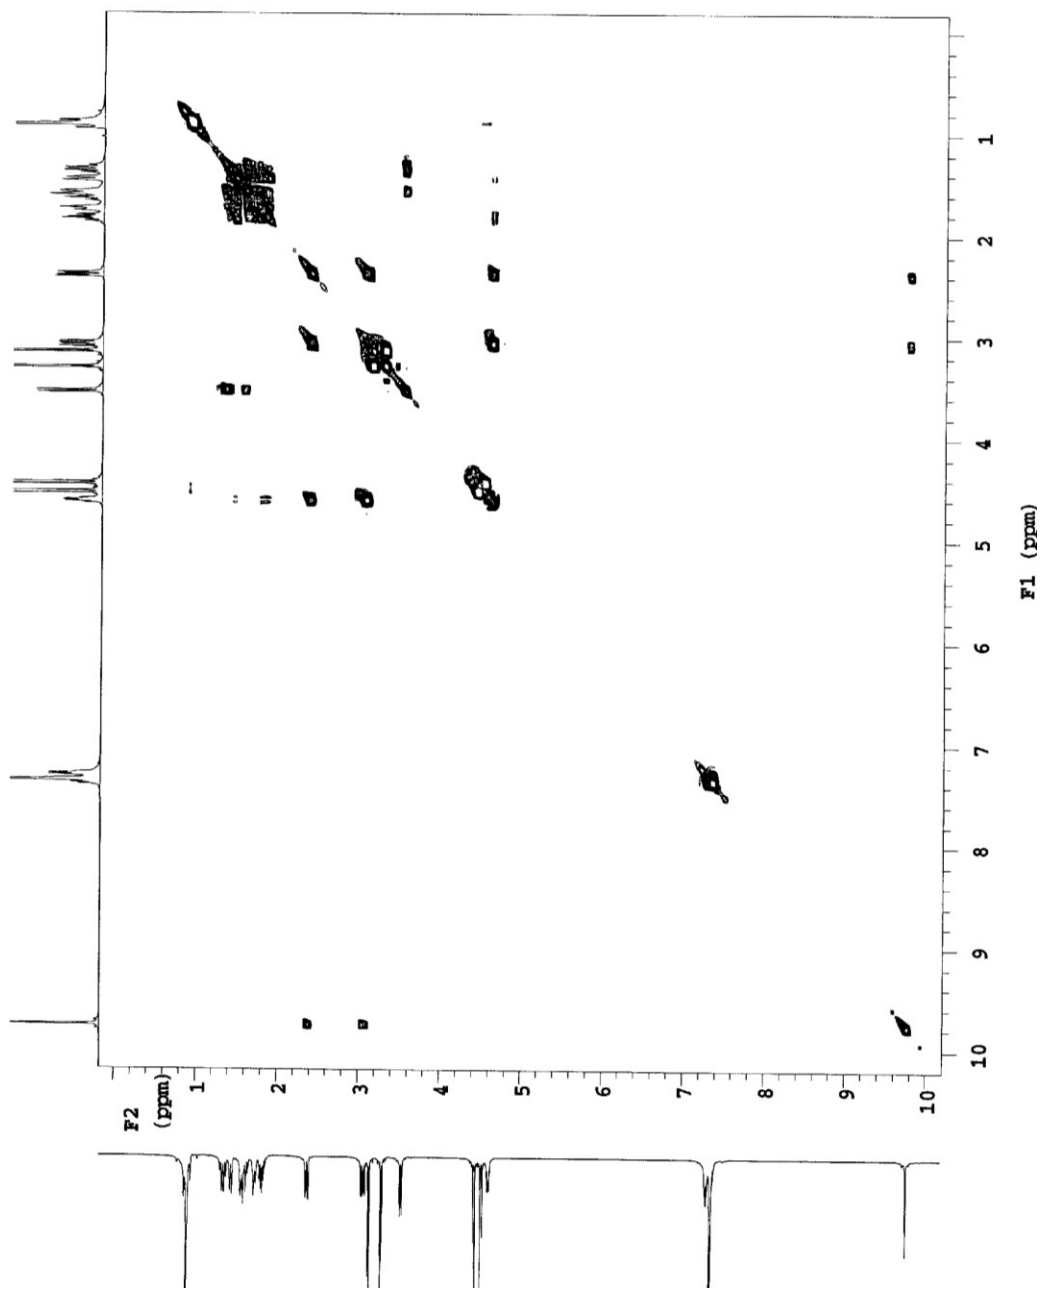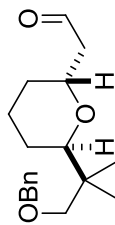

2,6-*trans*-Tetrahydropyran **8**  
 $^1\text{H}$ - $^1\text{H}$  COSY NMR, 500 MHz  
 $\text{CDCl}_3$

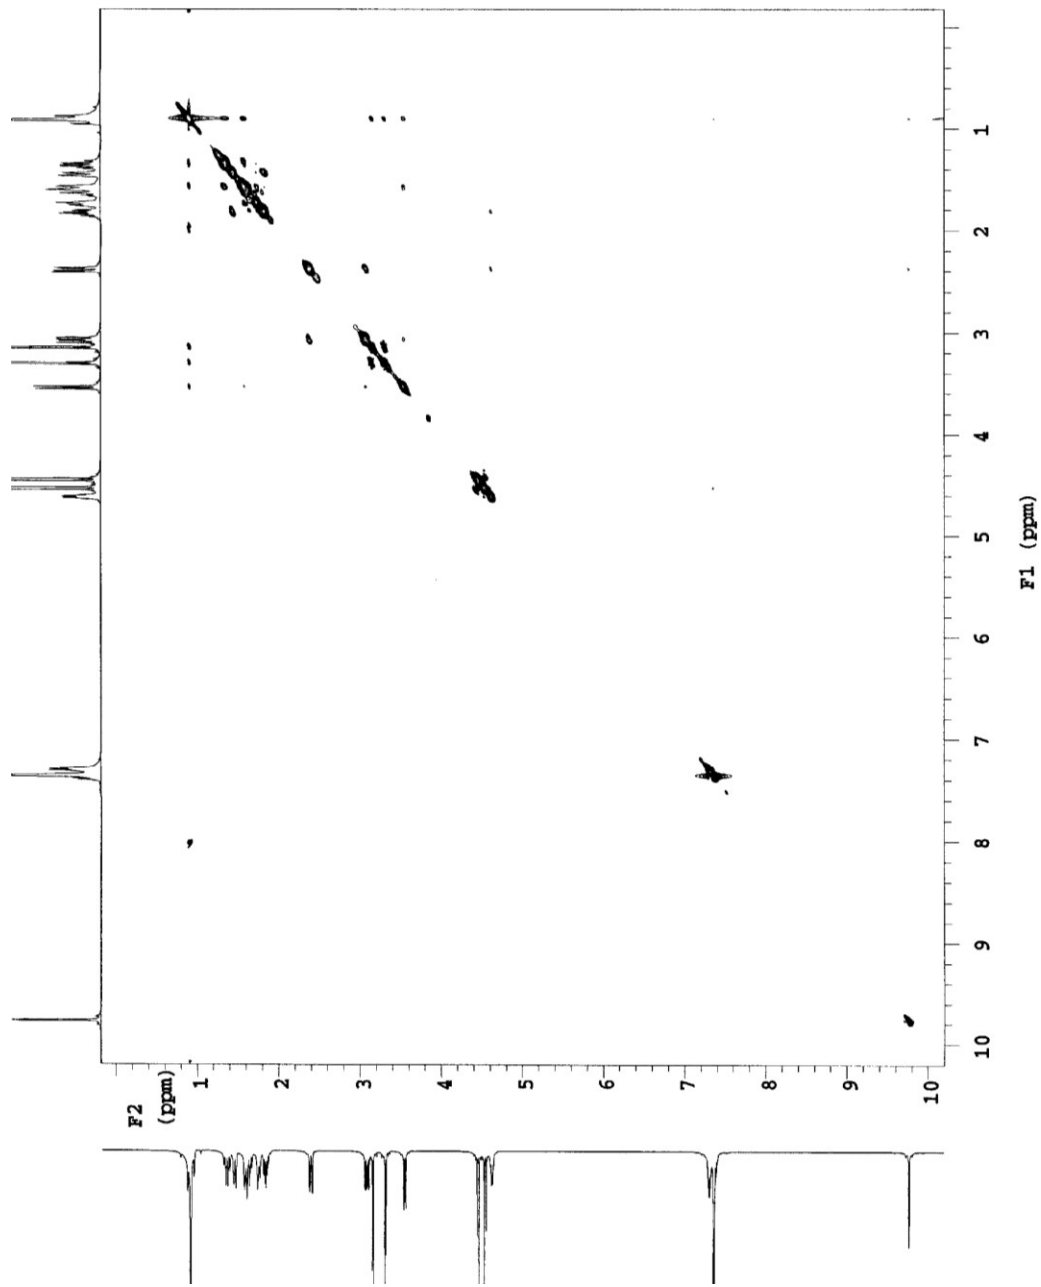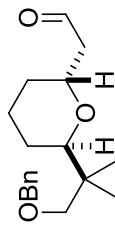

2,6-*trans*-Tetrahydropyran **8'**  
 $^1\text{H}$ - $^1\text{H}$  NOESY NMR, 500 MHz  
 $\text{CDCl}_3$

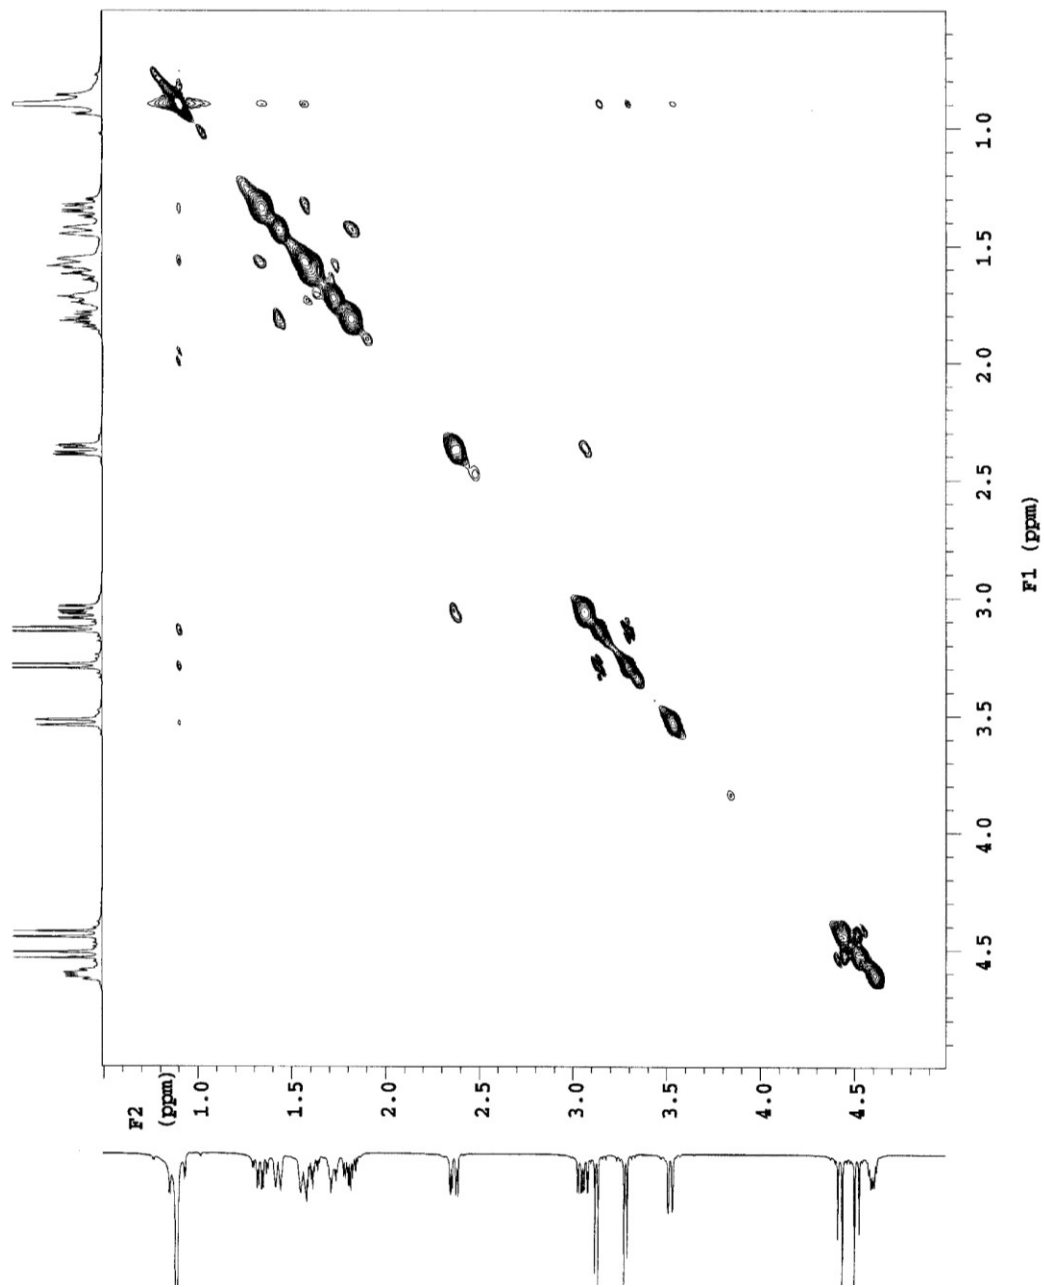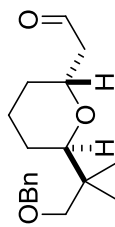

2,6-*trans*-Tetrahydropyran **8'**  
 $^1\text{H}$ - $^1\text{H}$  NOESY NMR, 500 MHz  
 $\text{CDCl}_3$

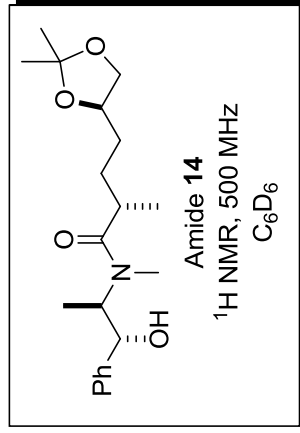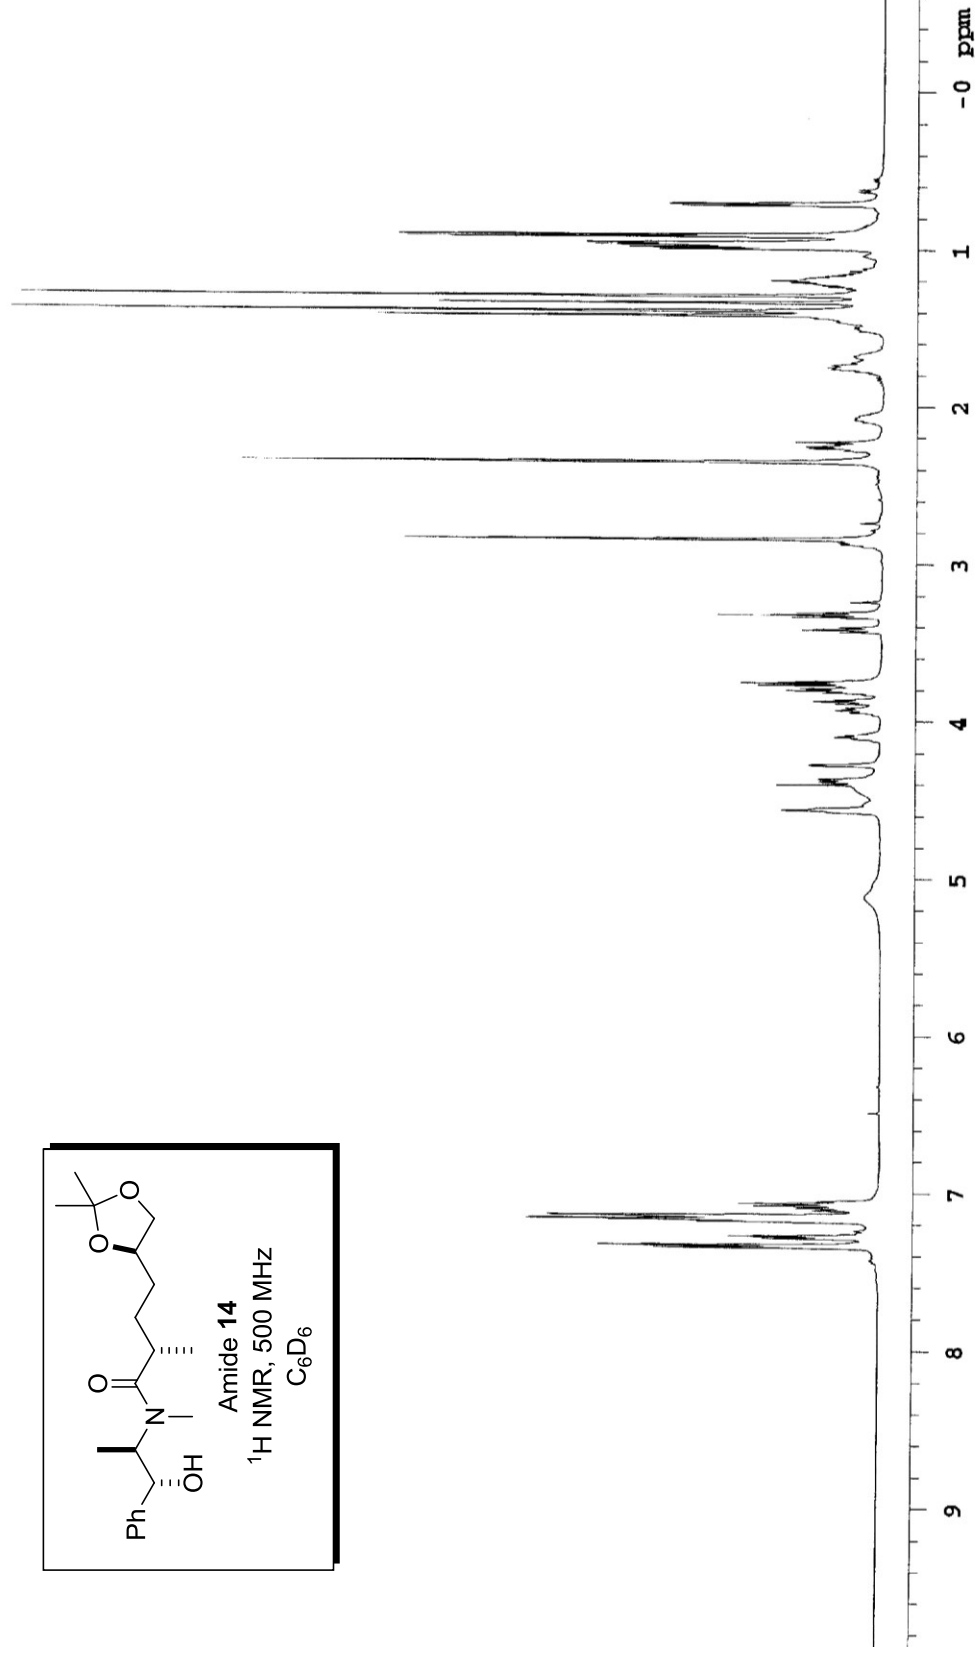

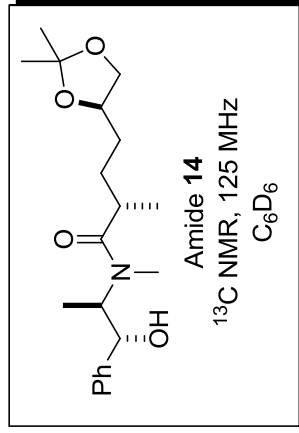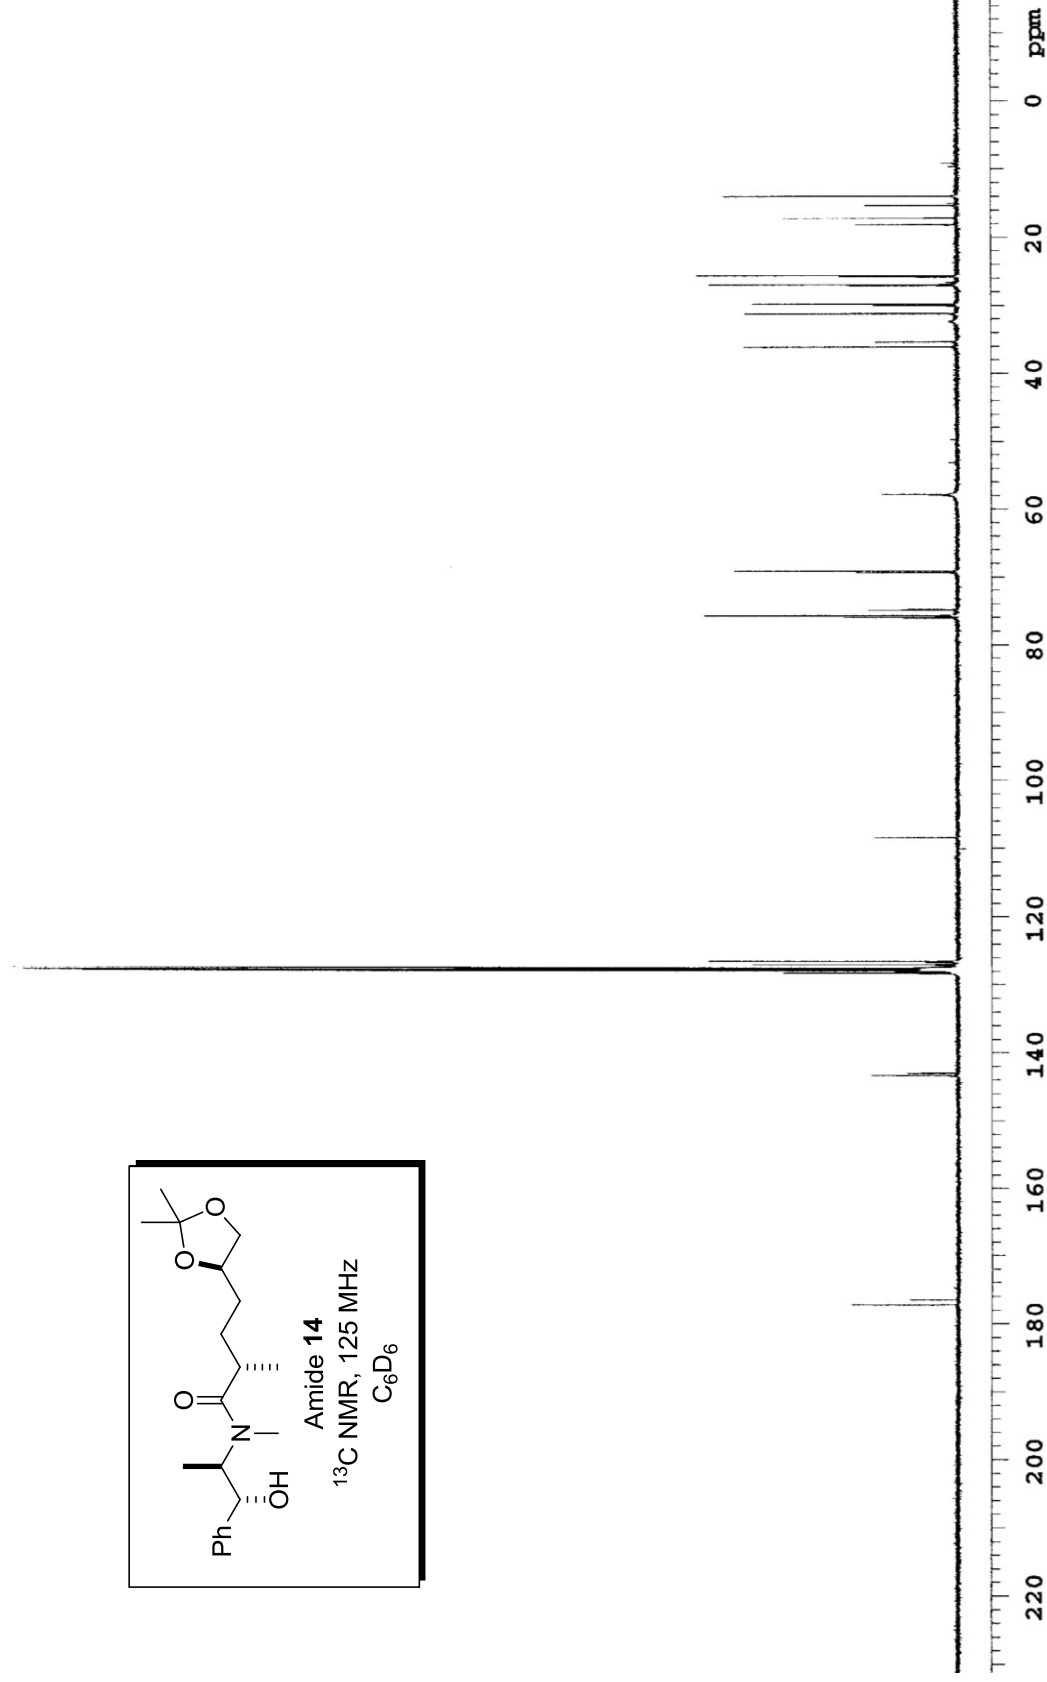

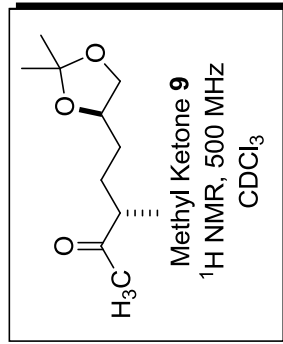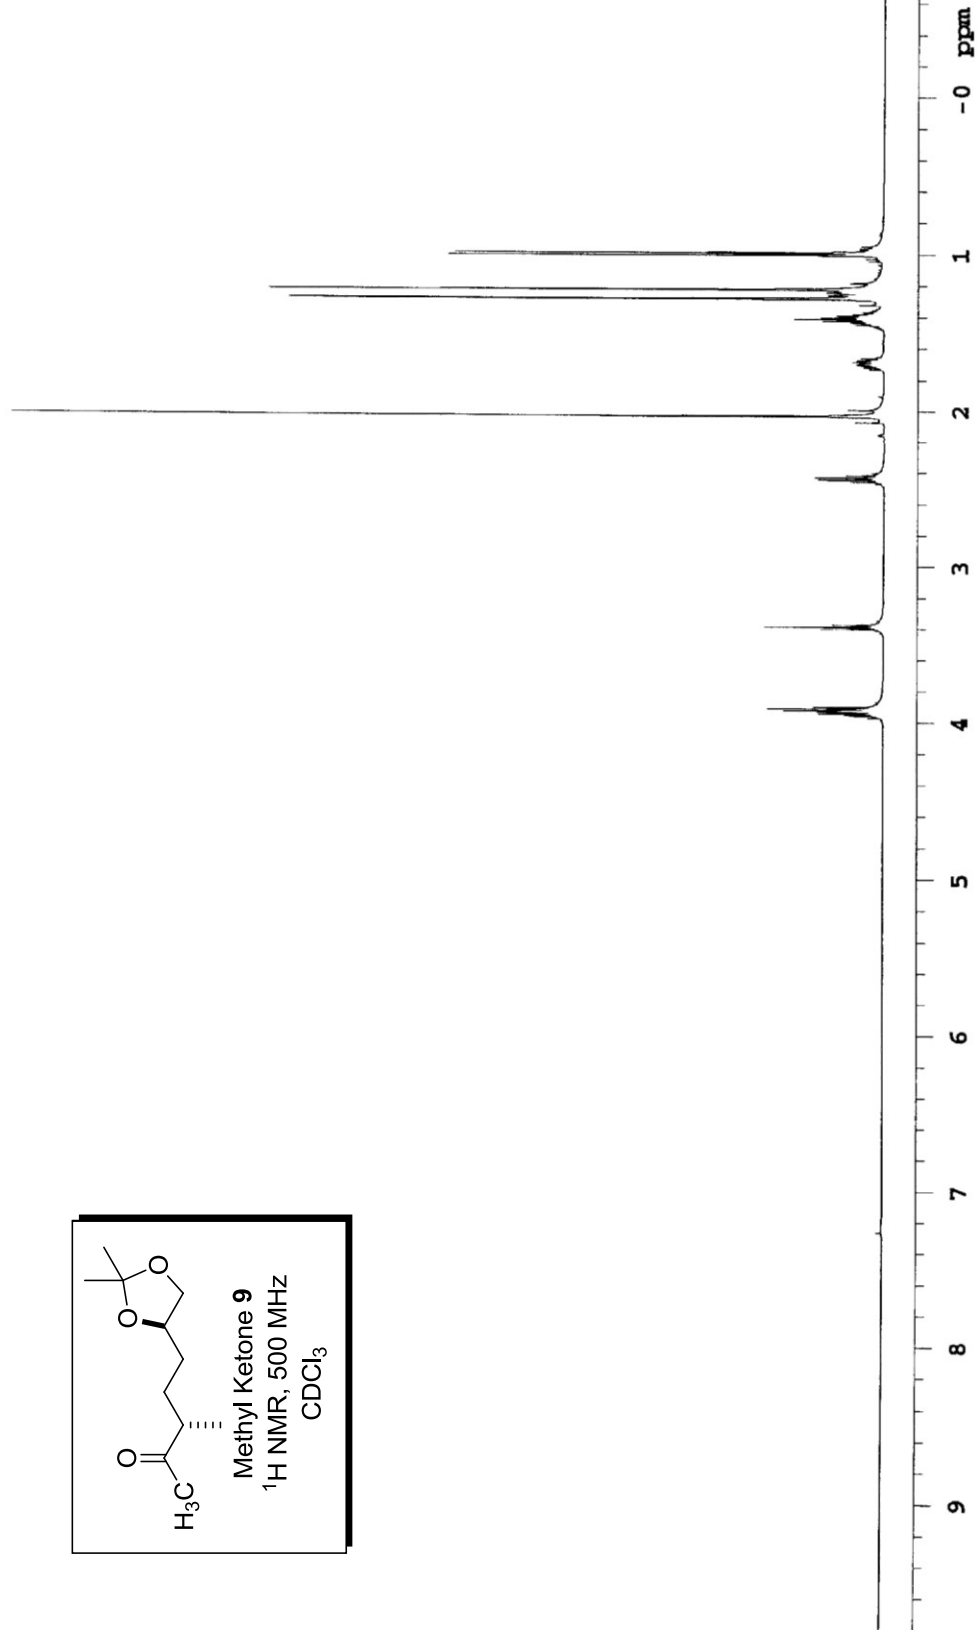

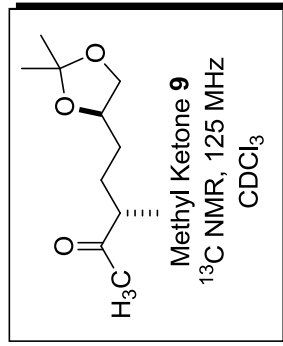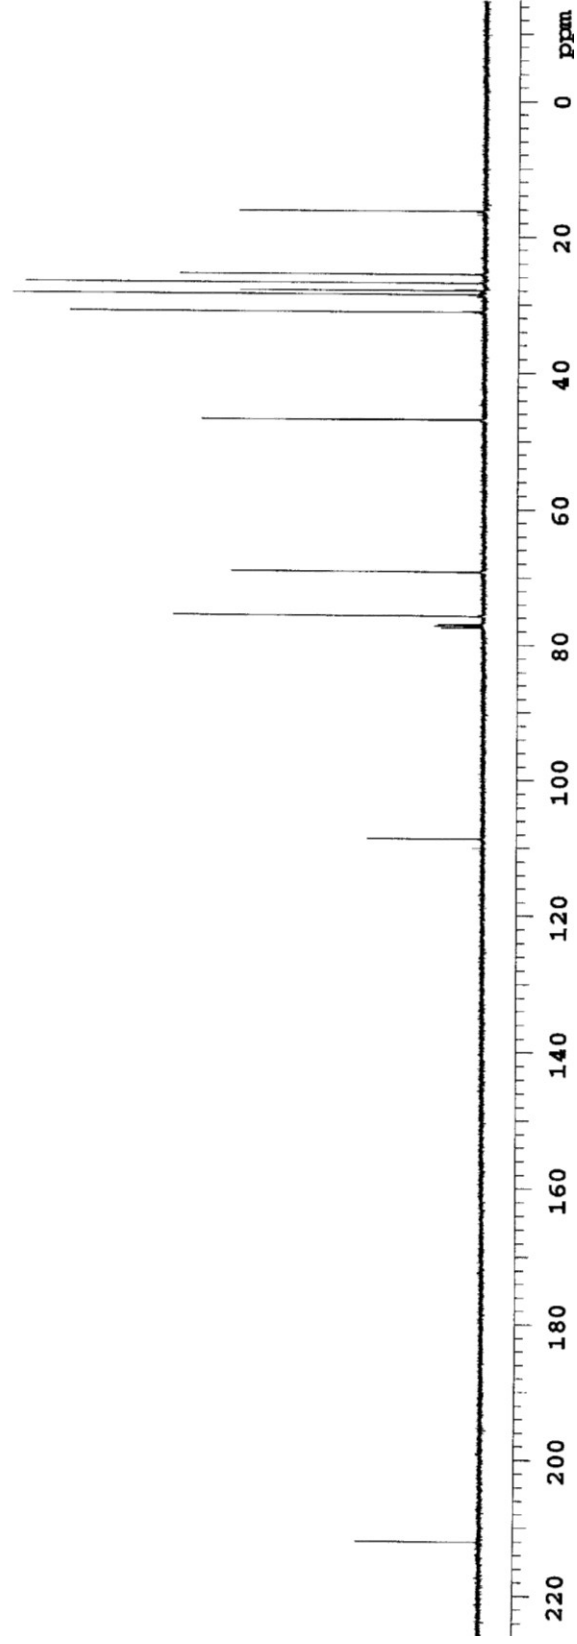

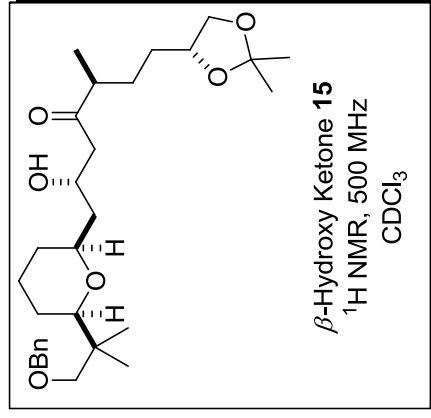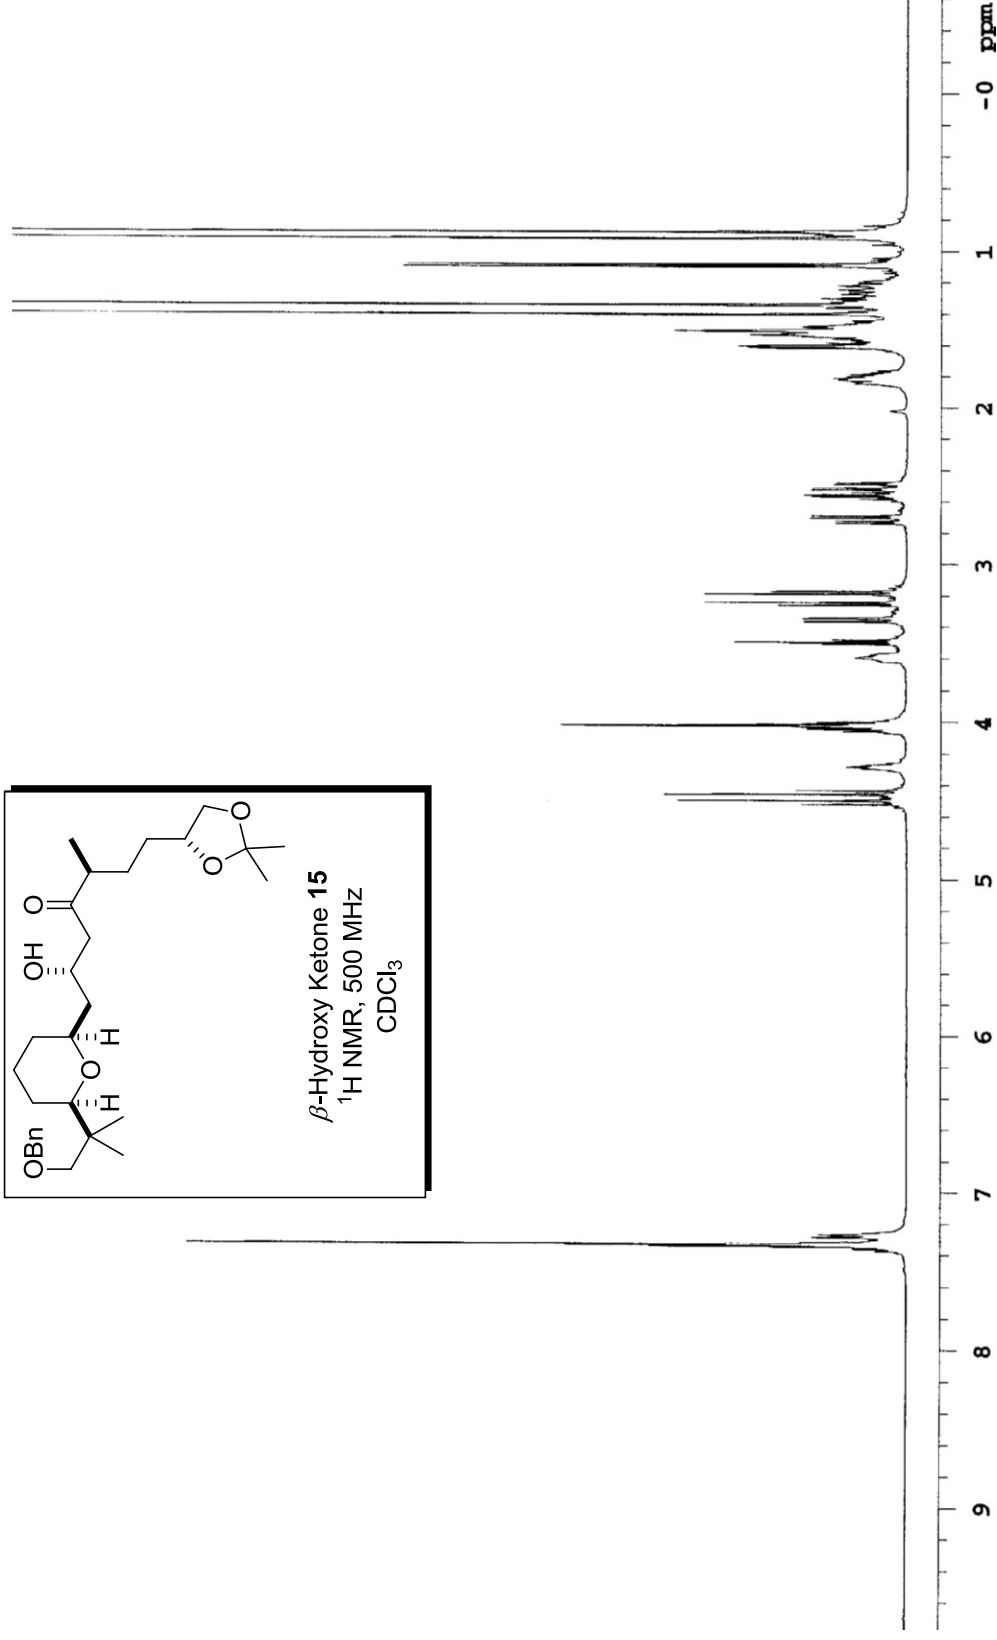

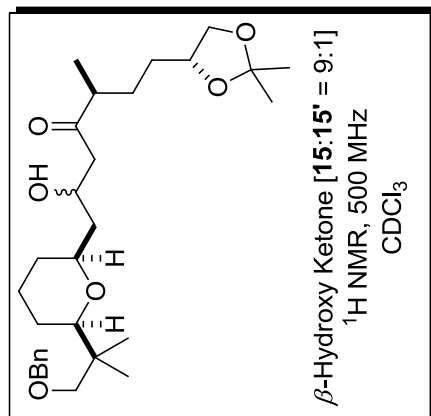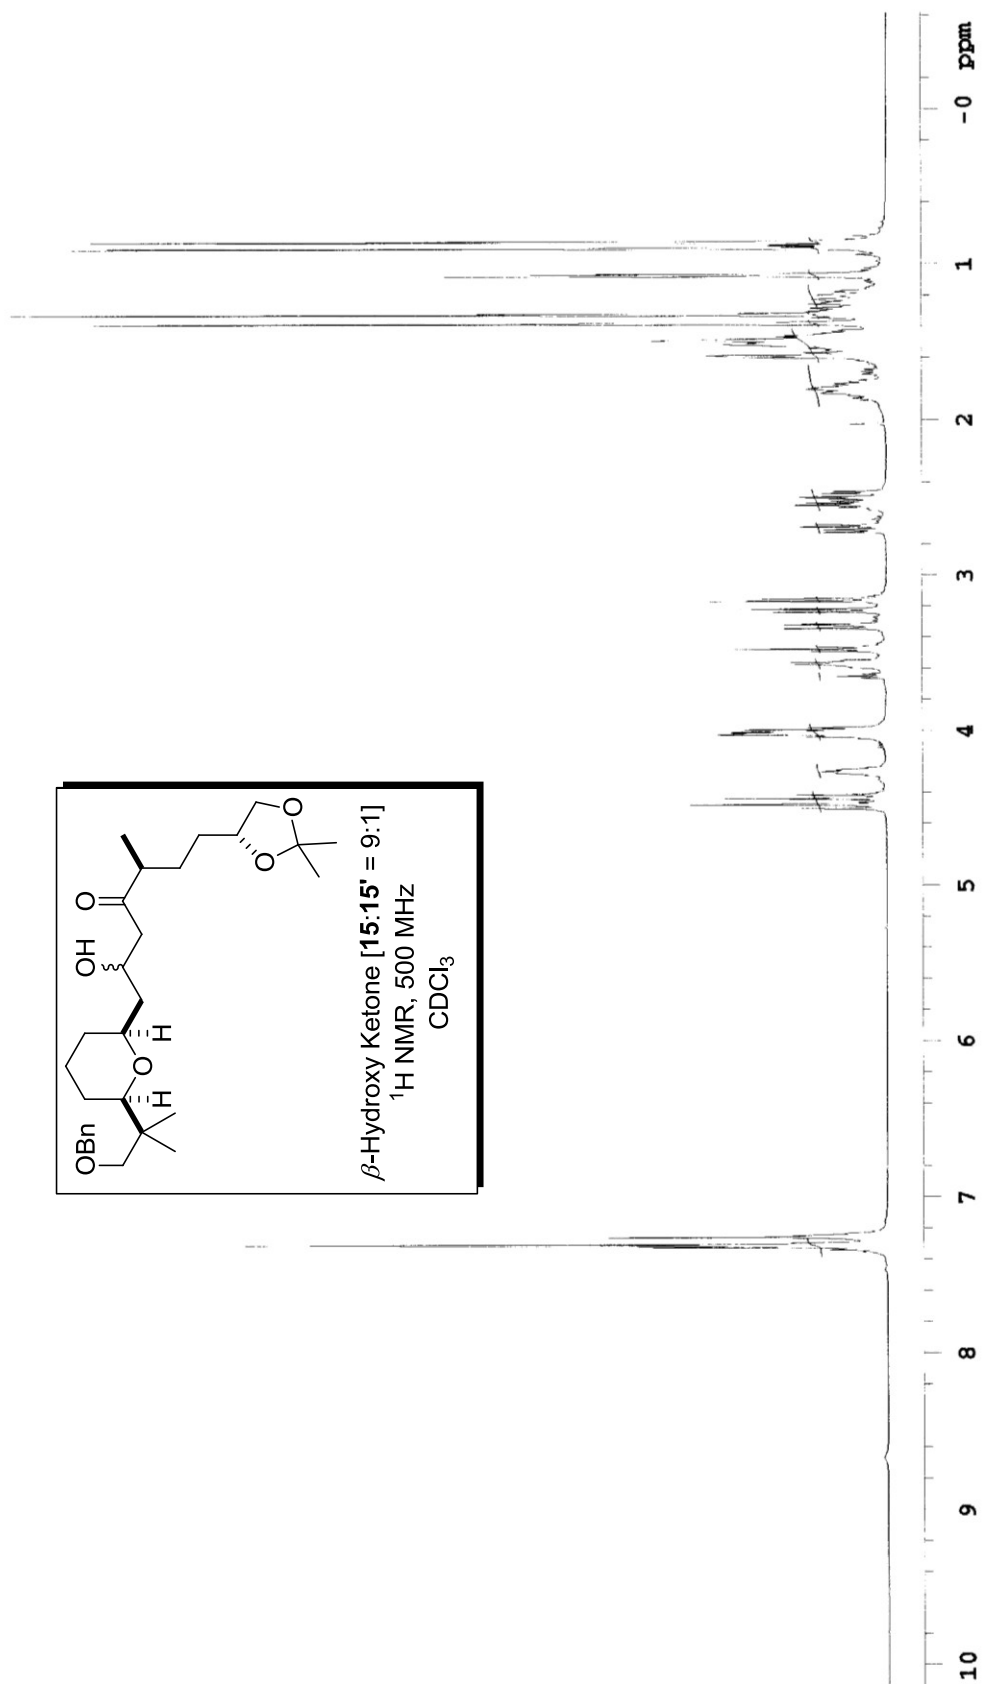

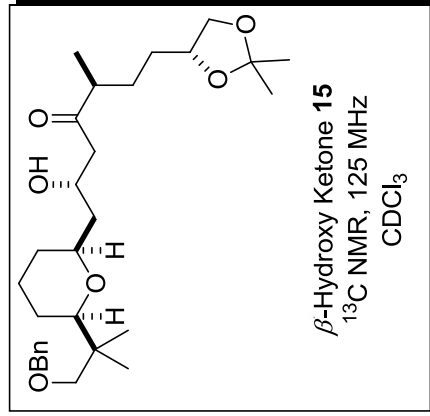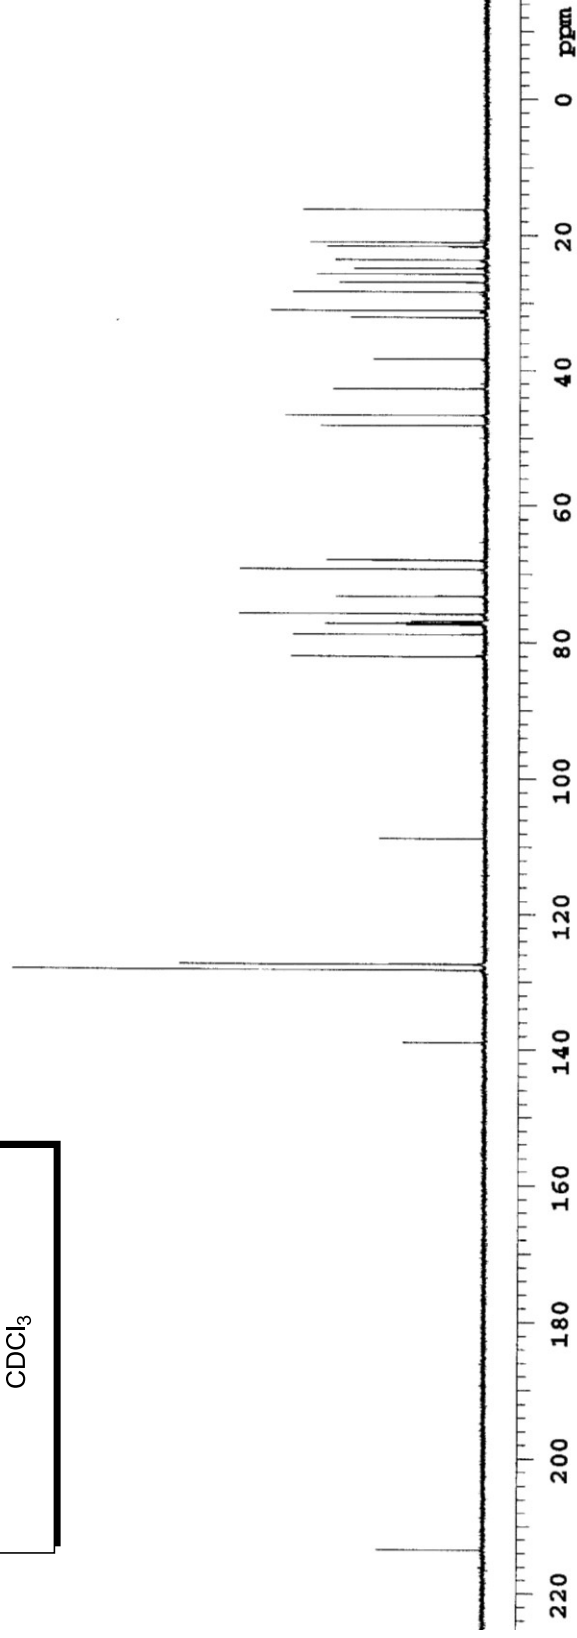

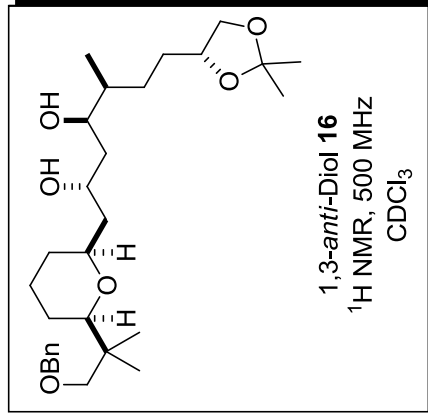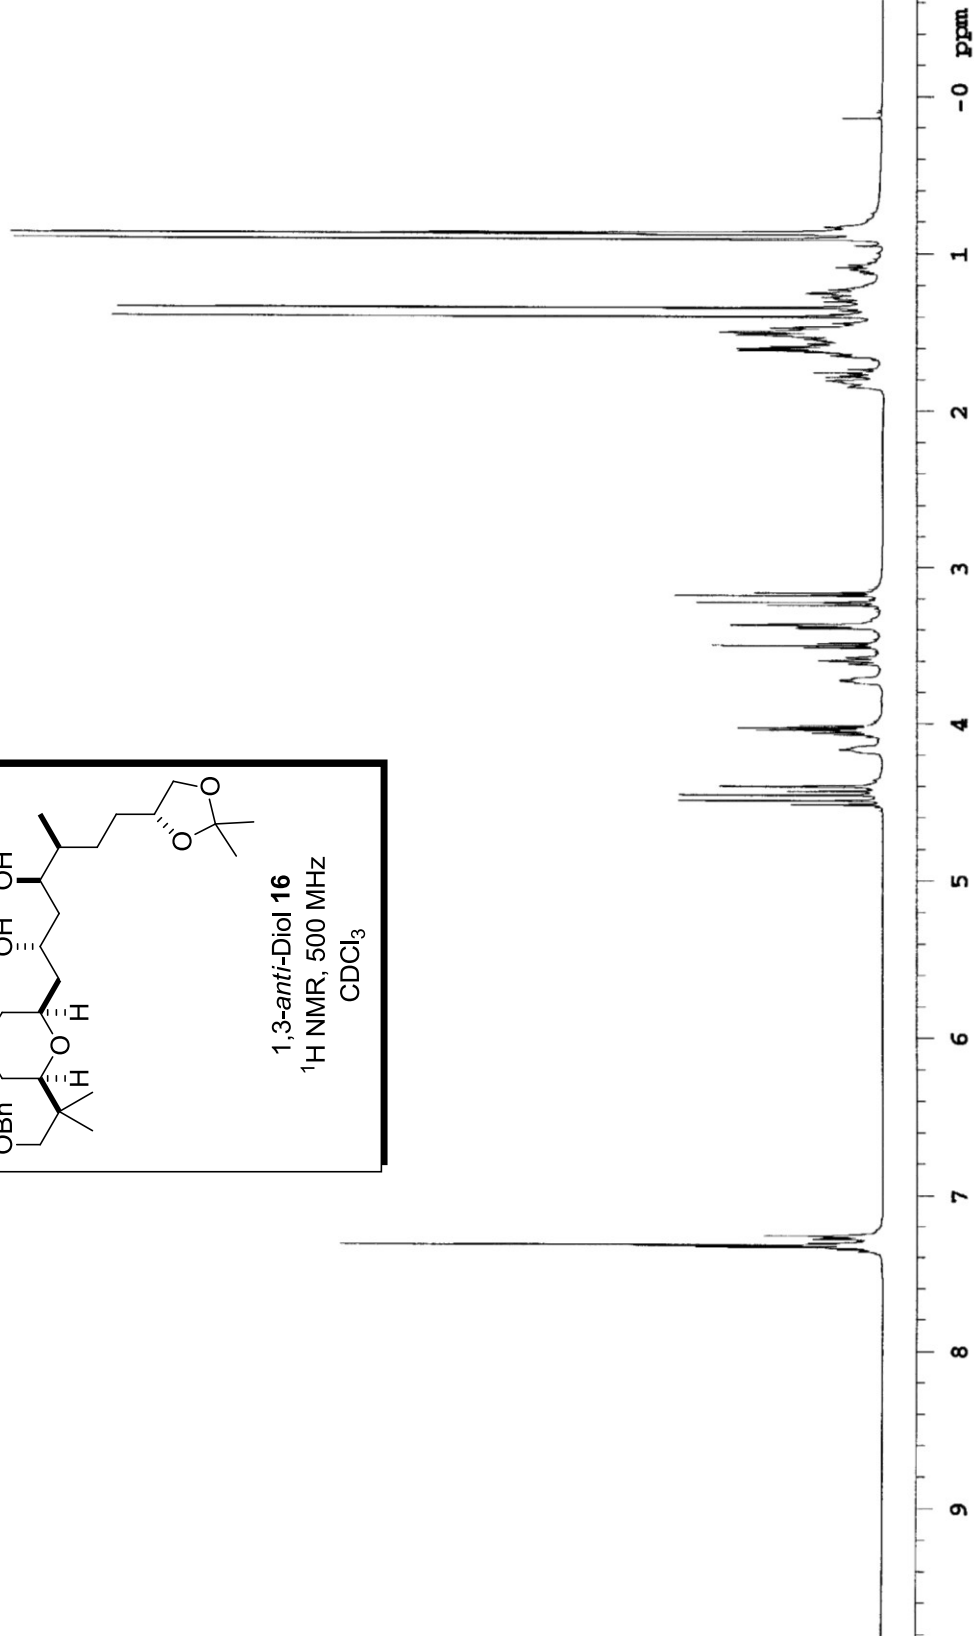

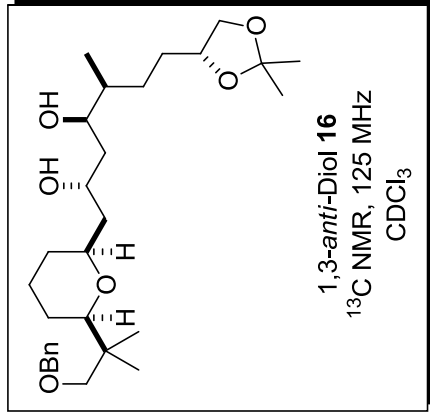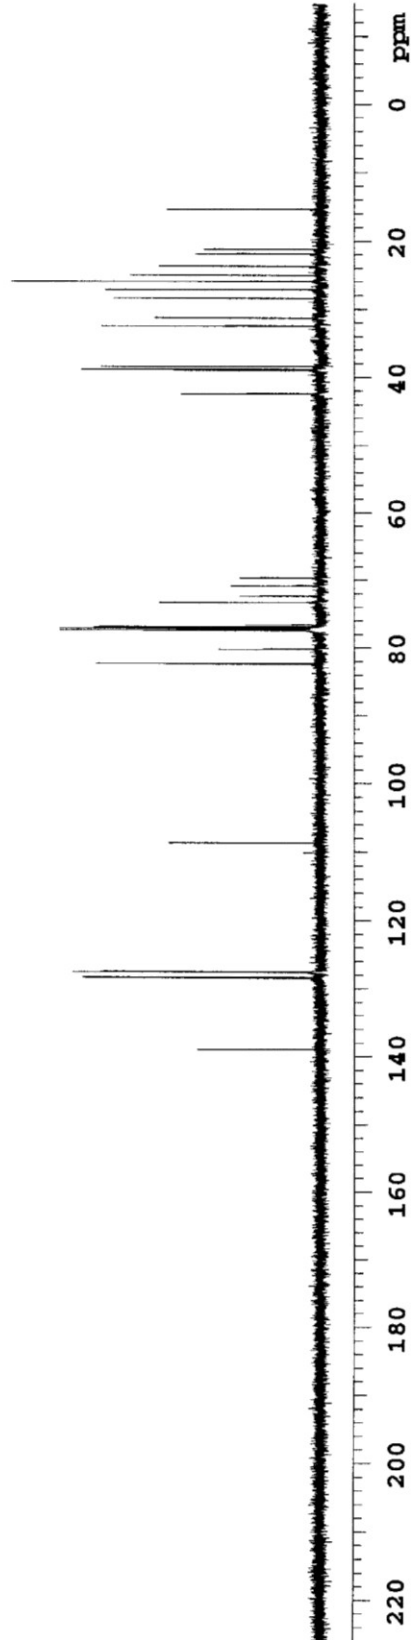

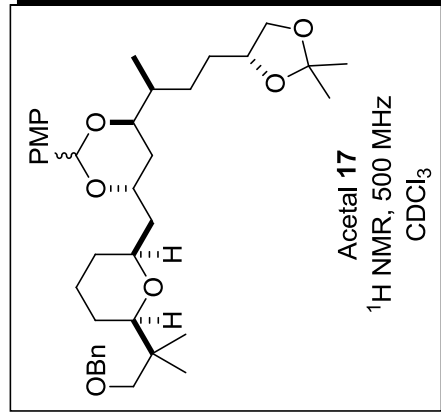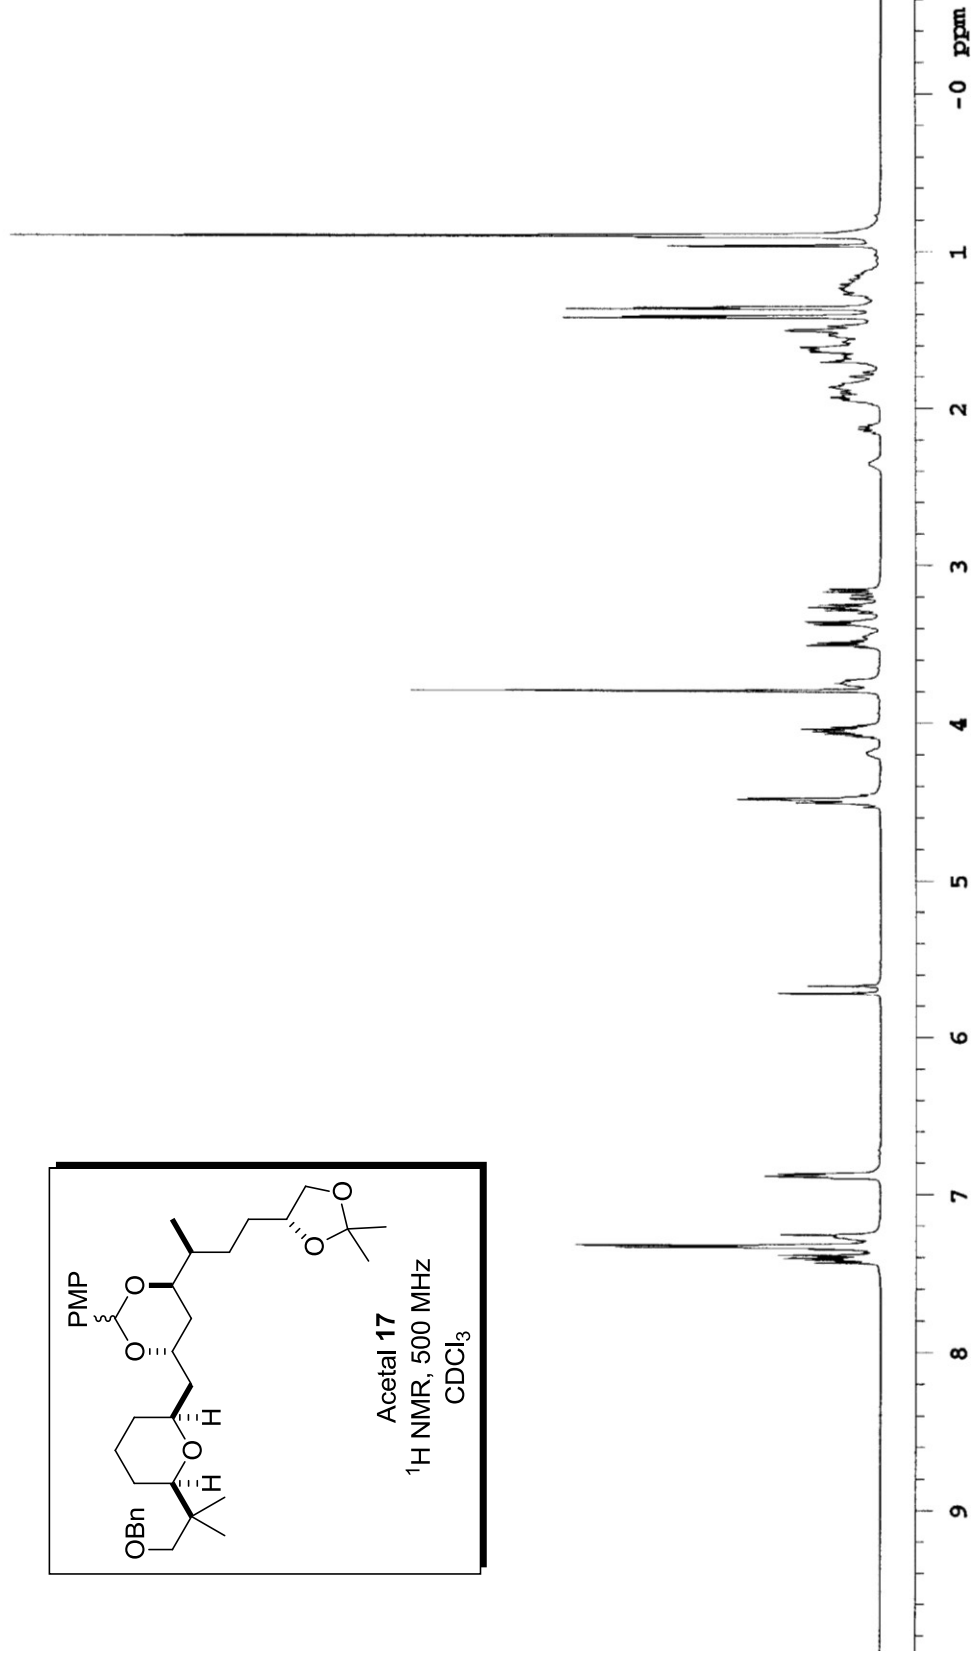

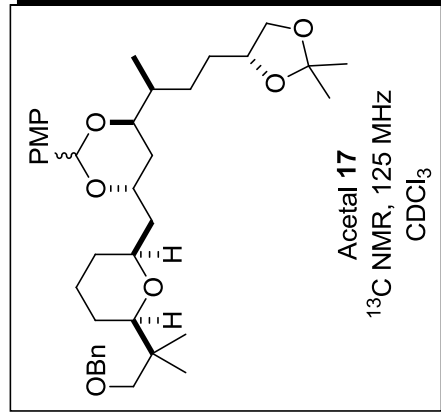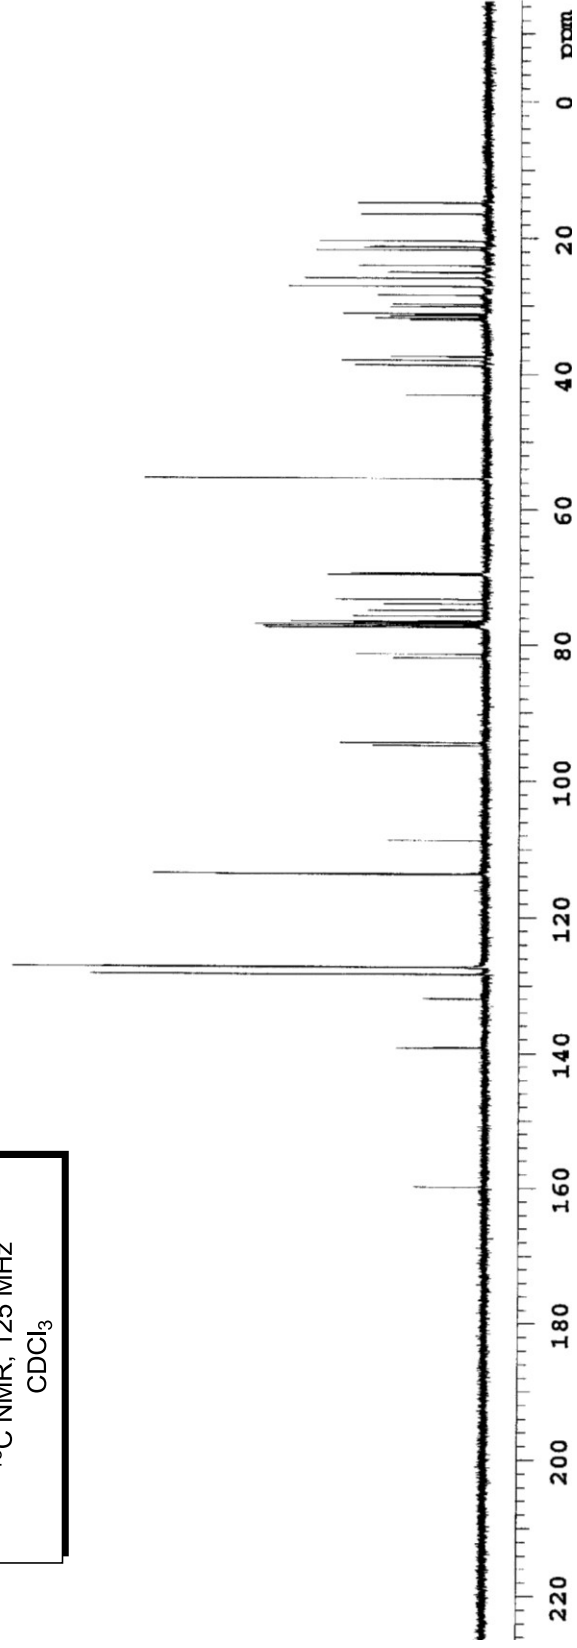

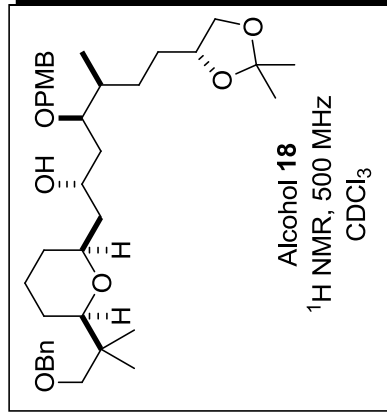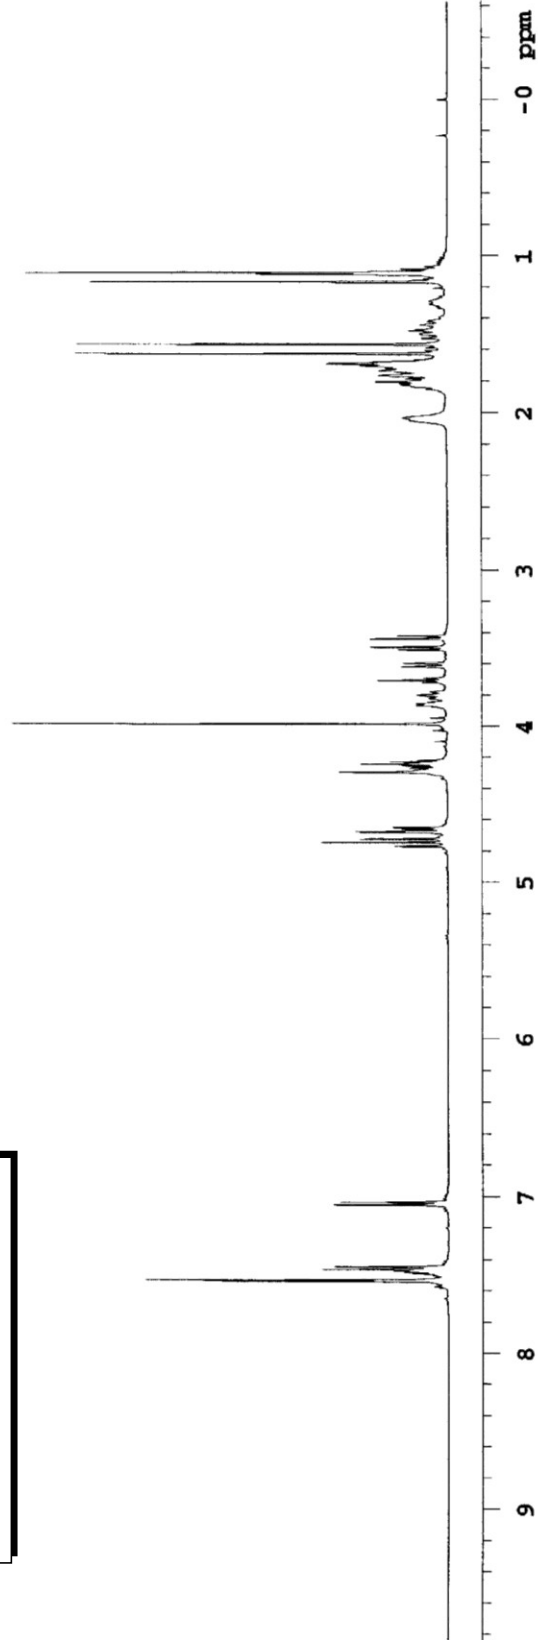

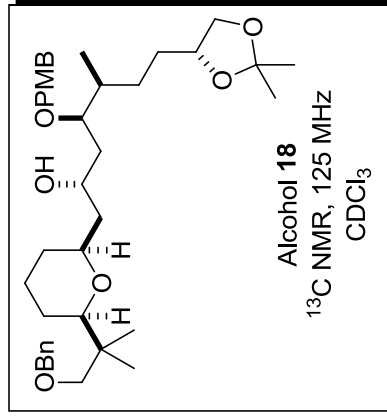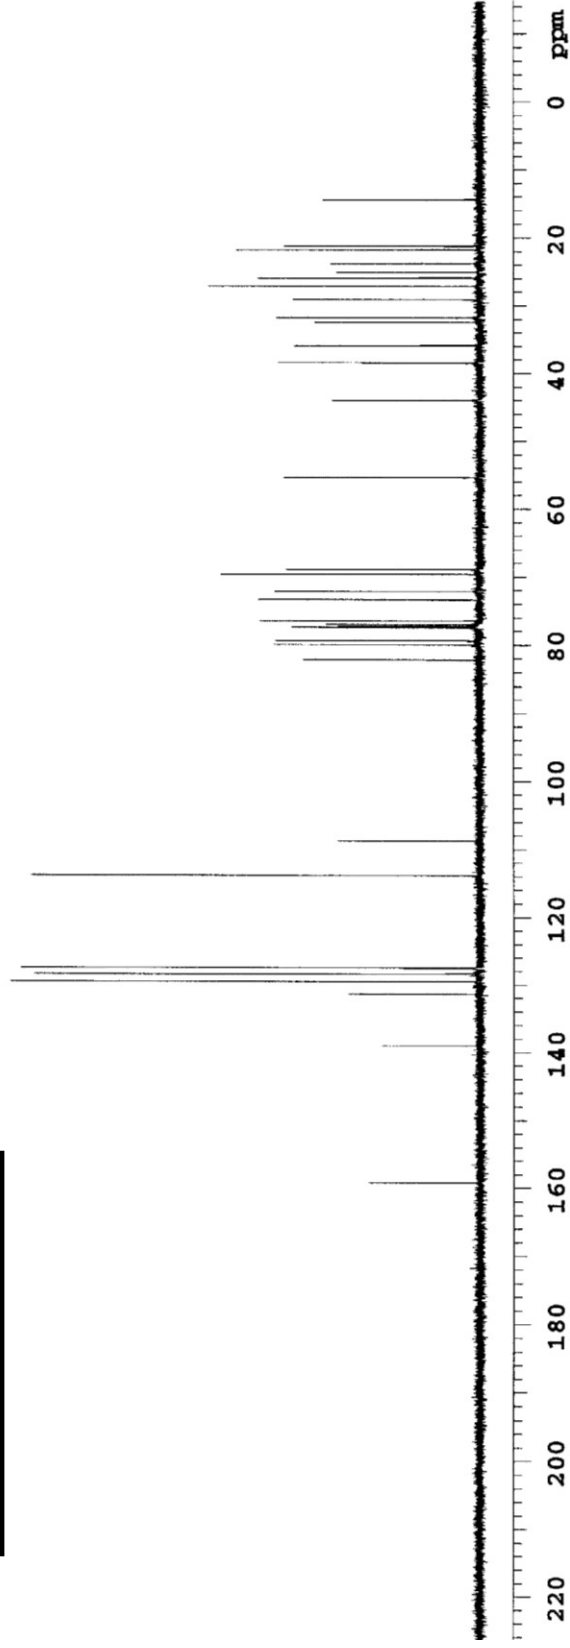

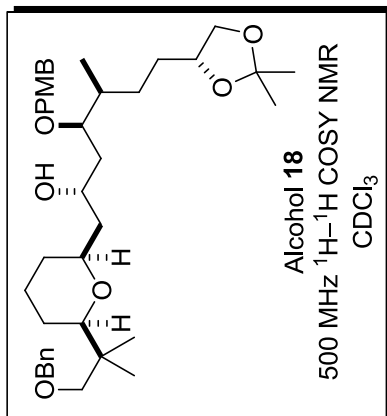



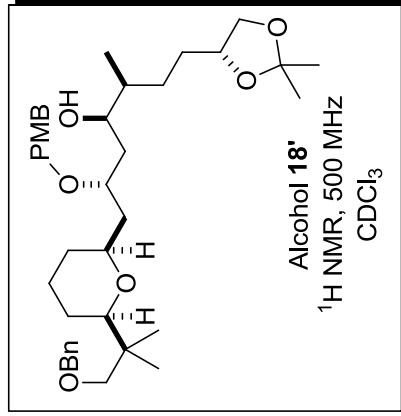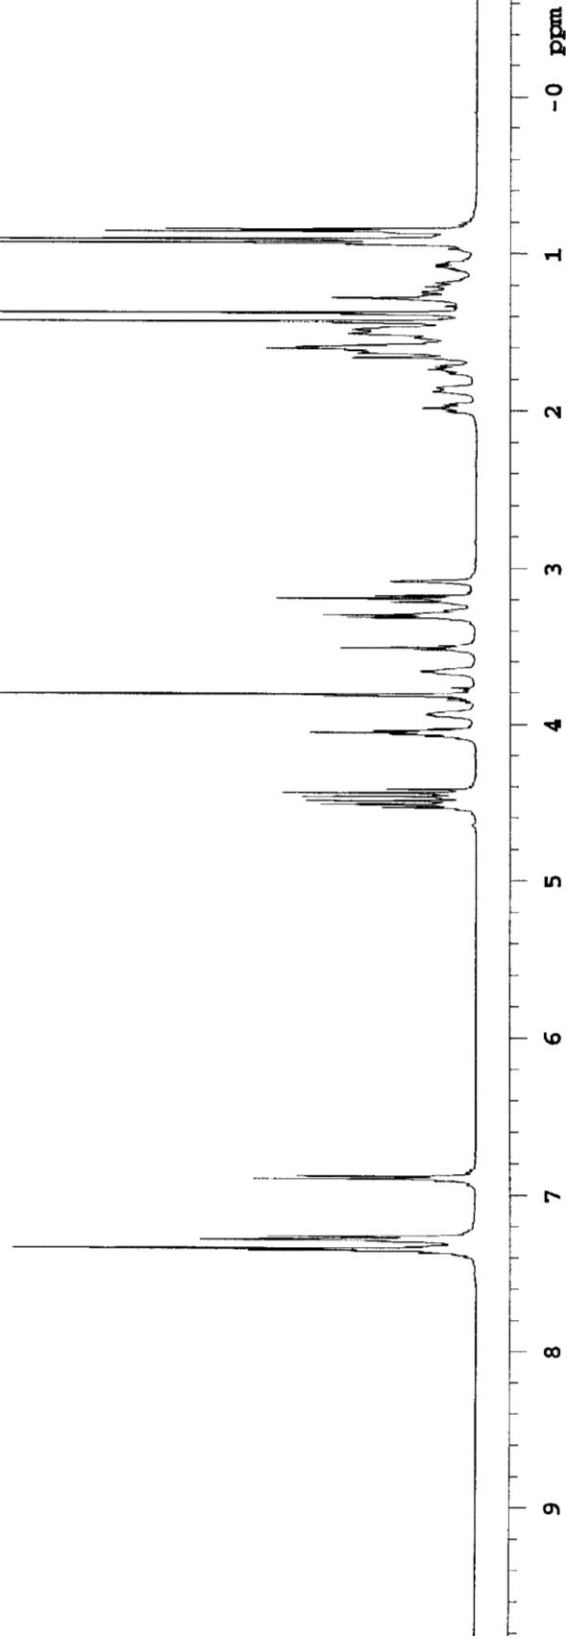

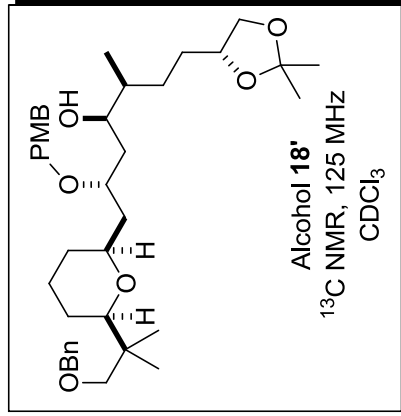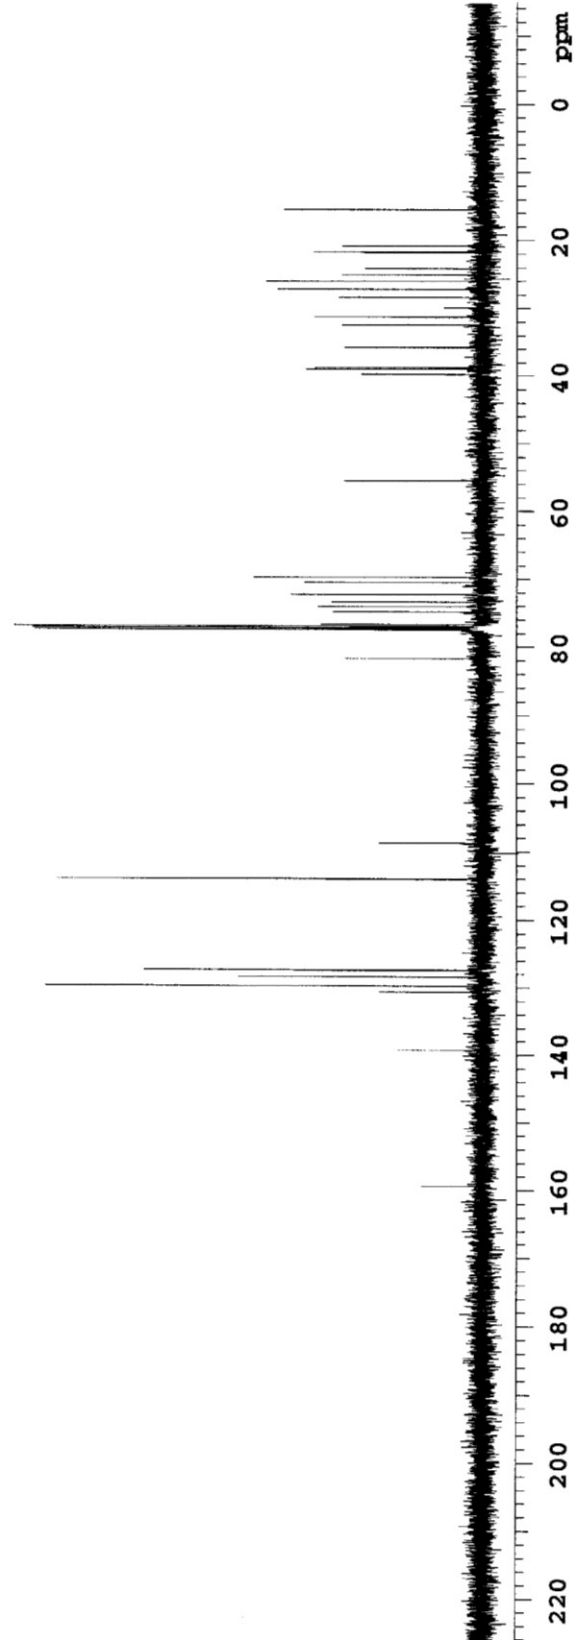

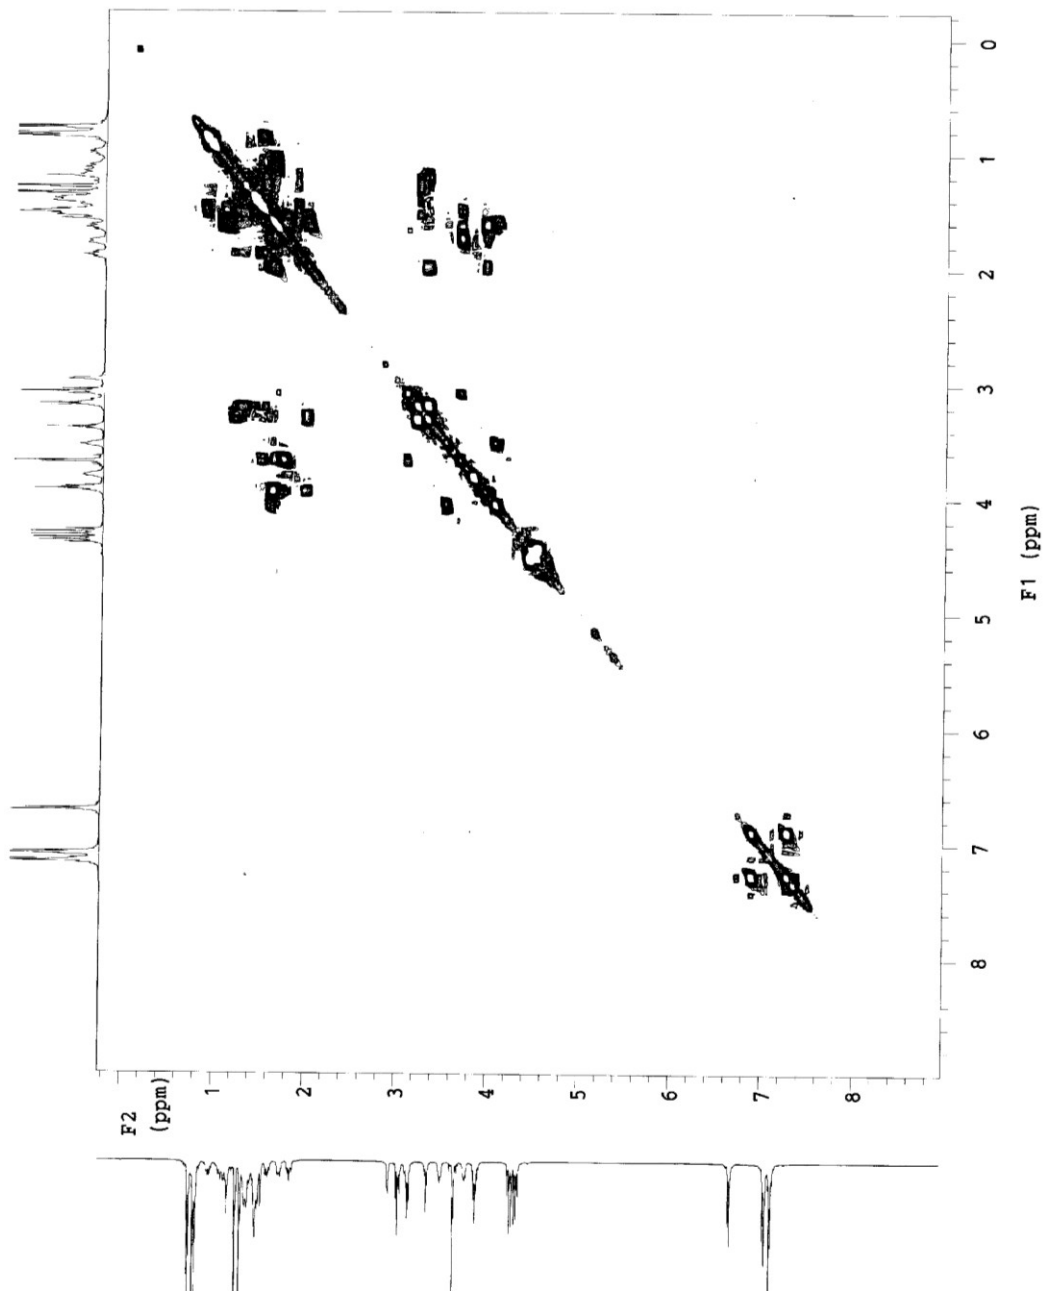



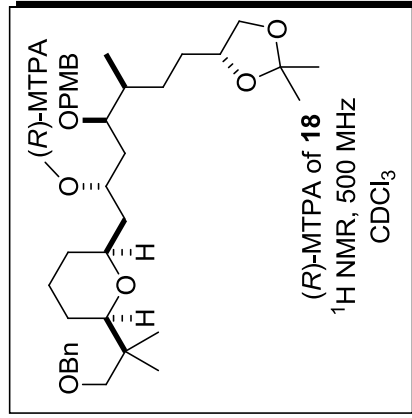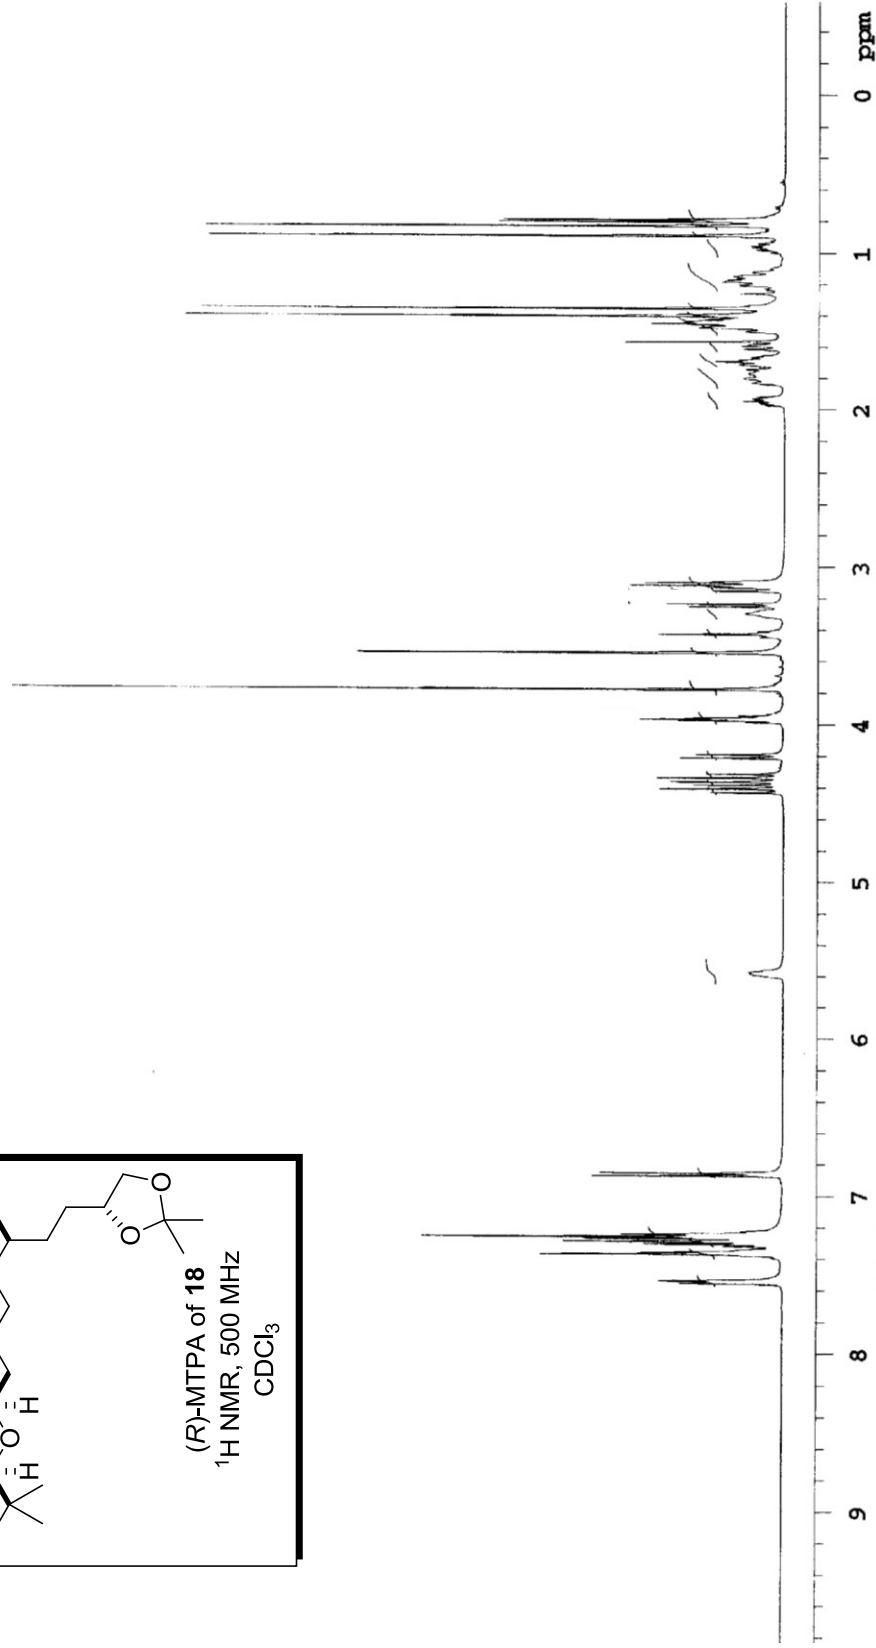

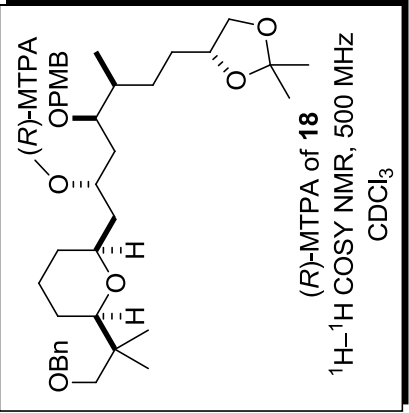

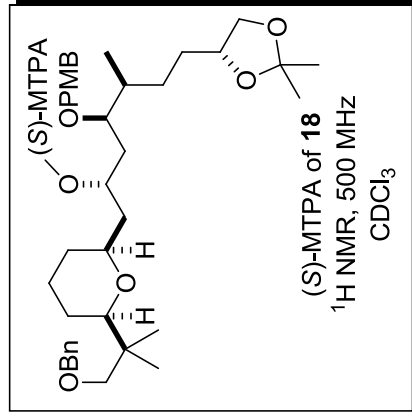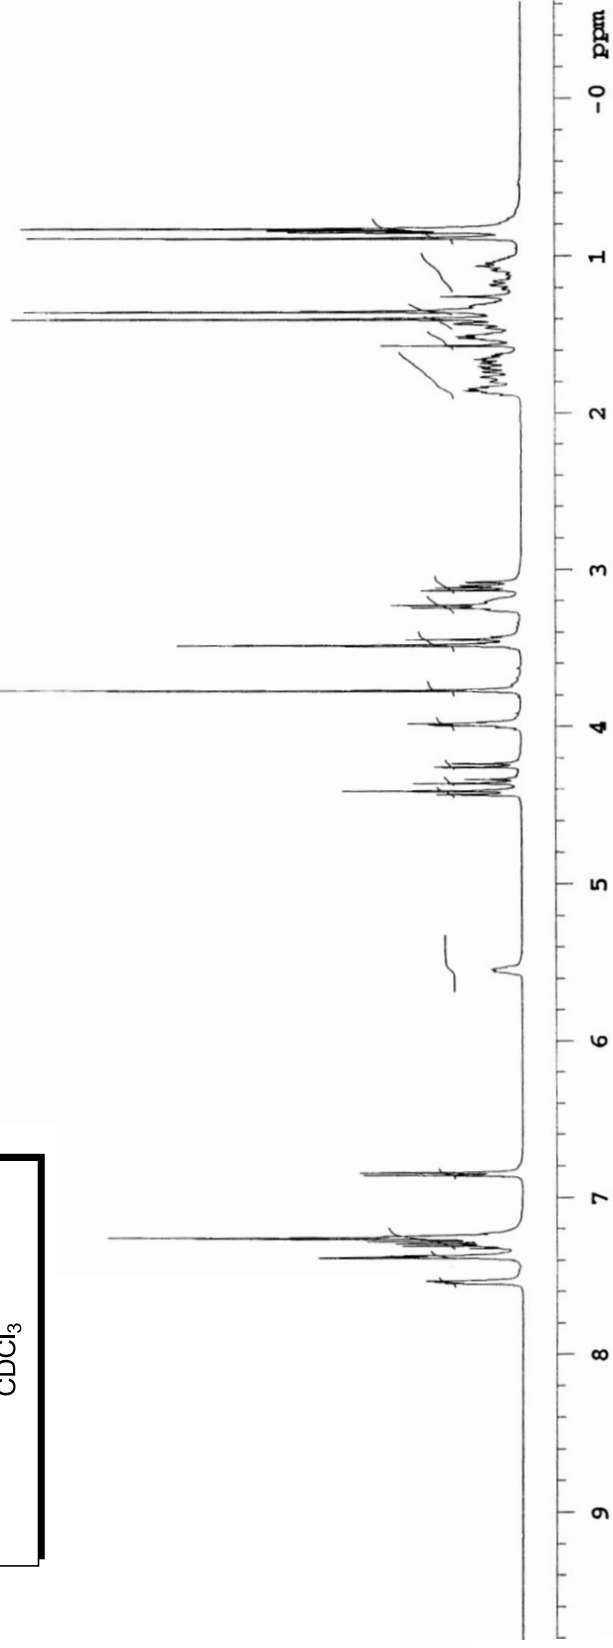

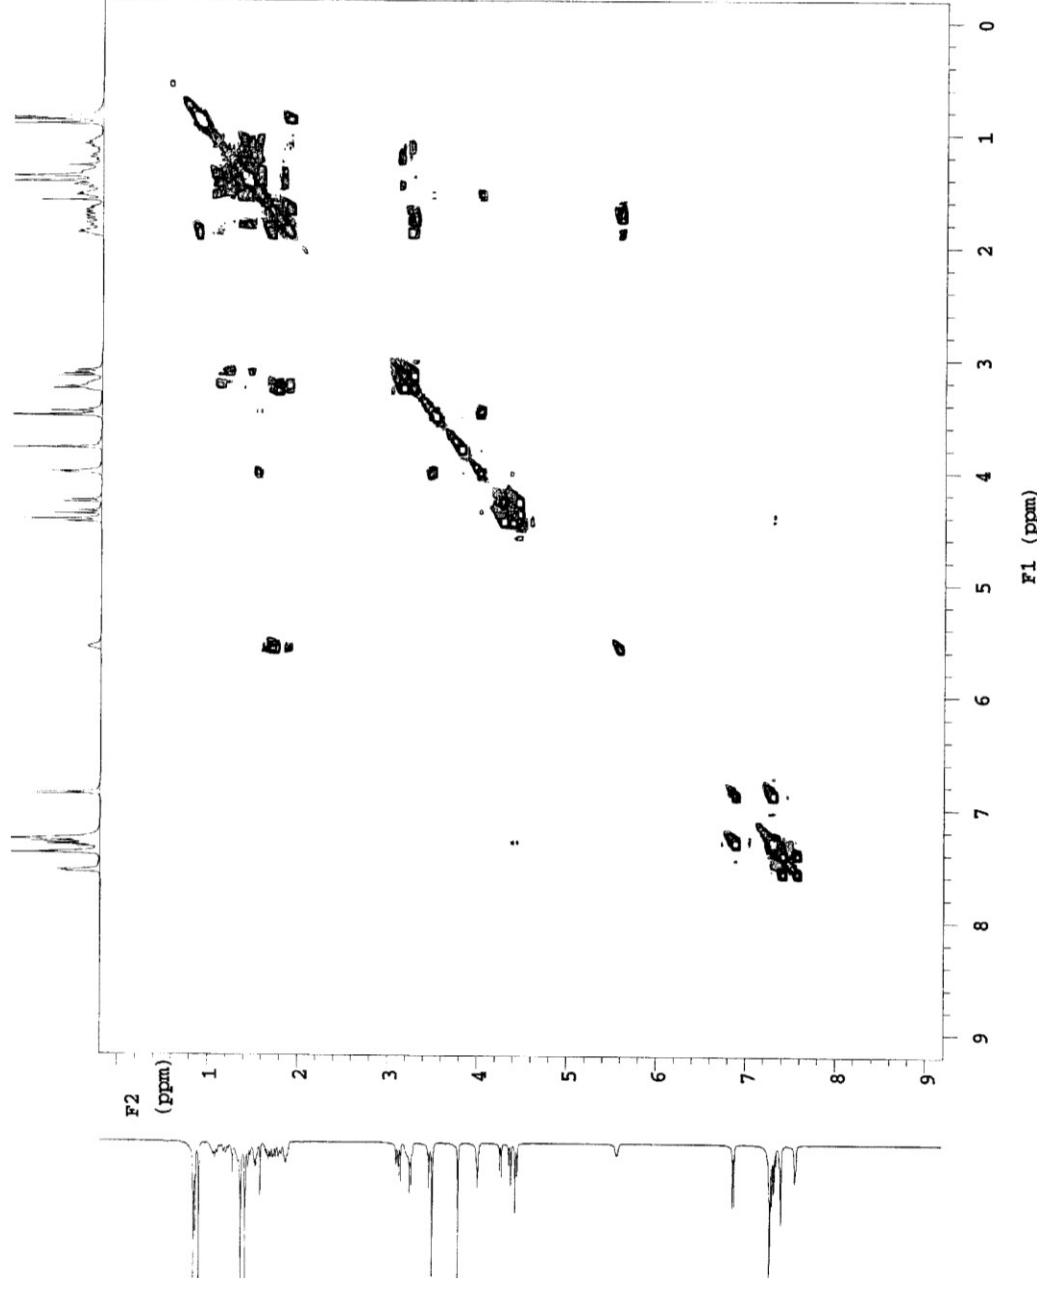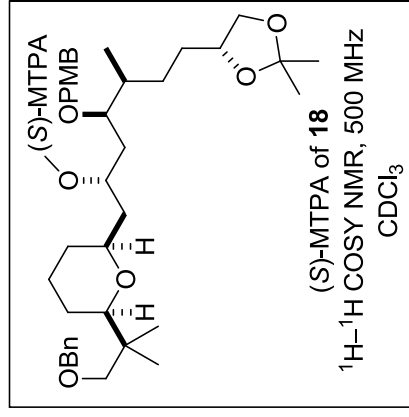

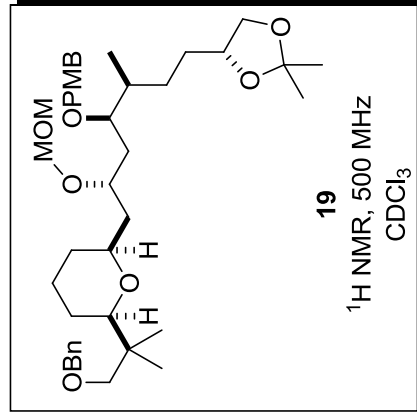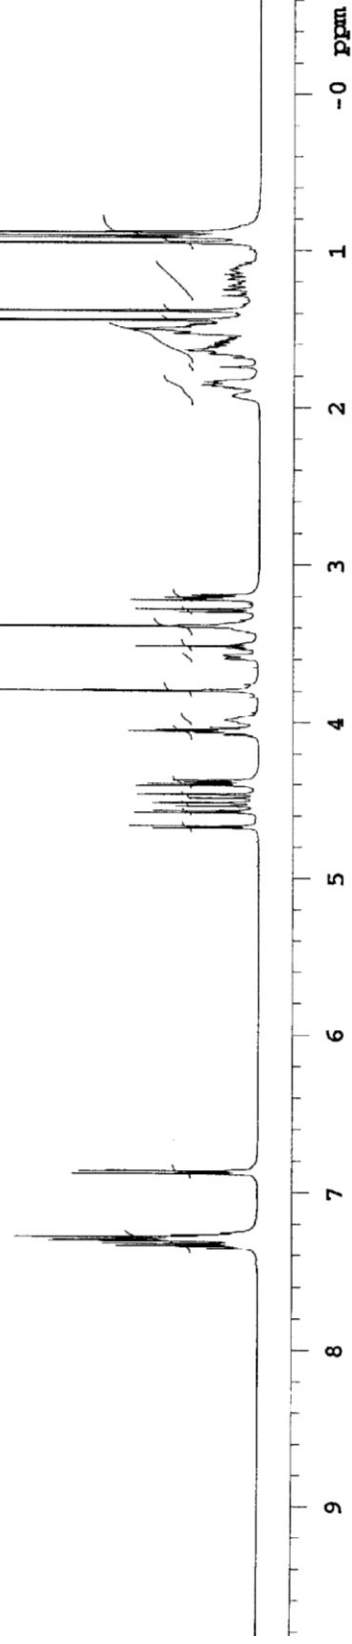

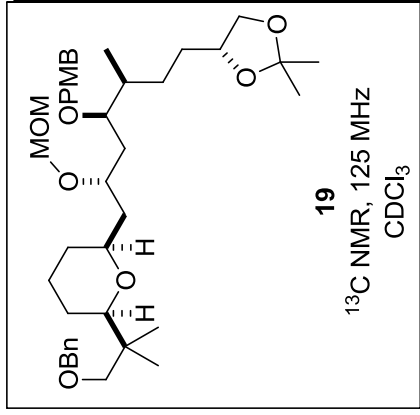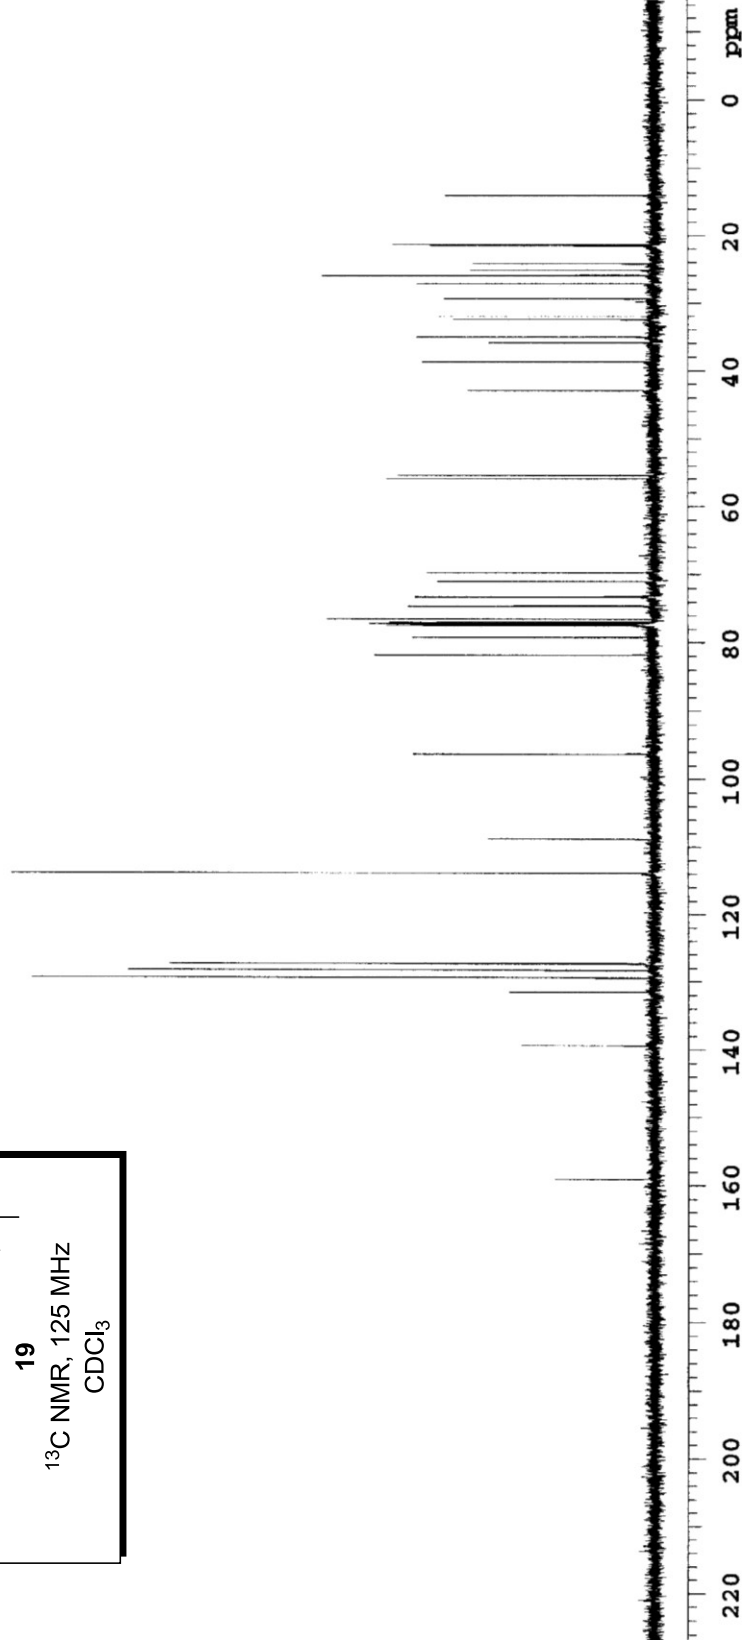

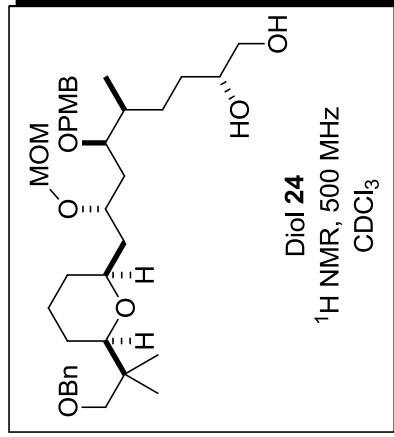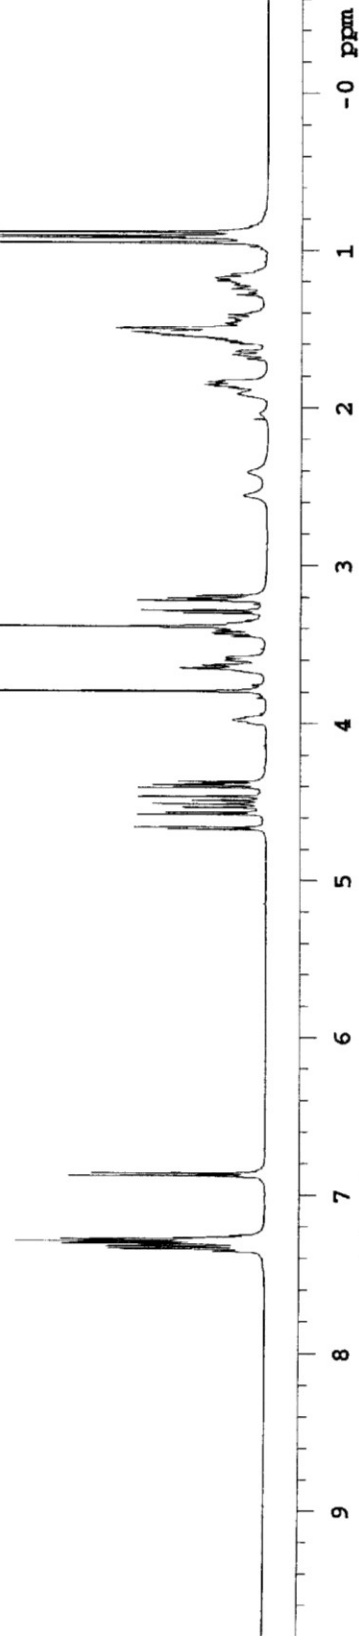

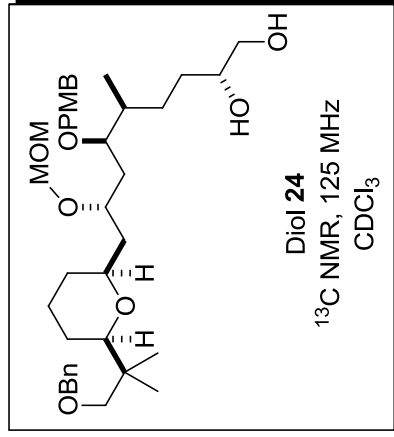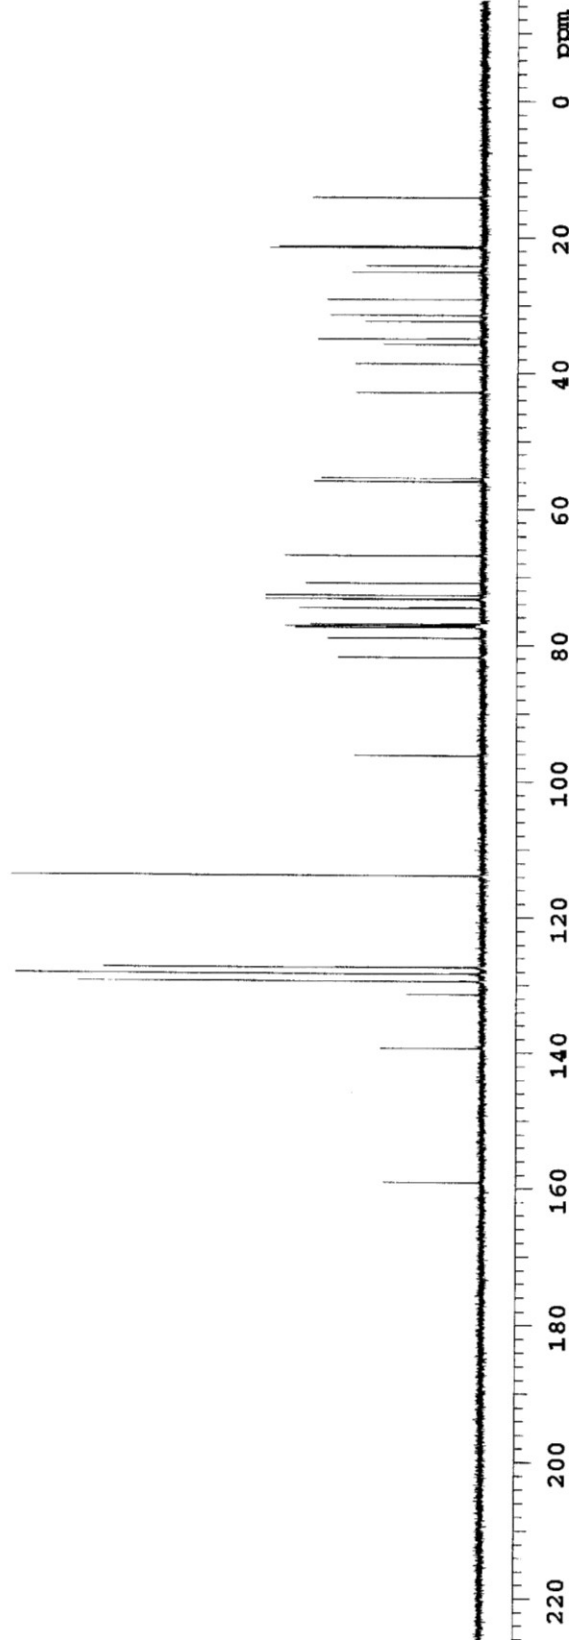

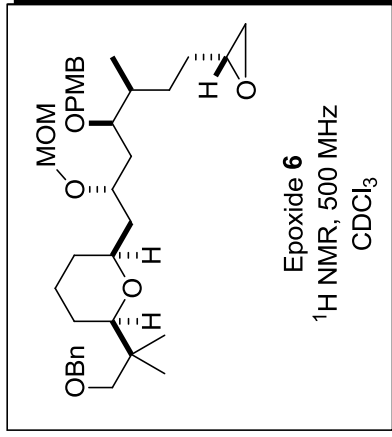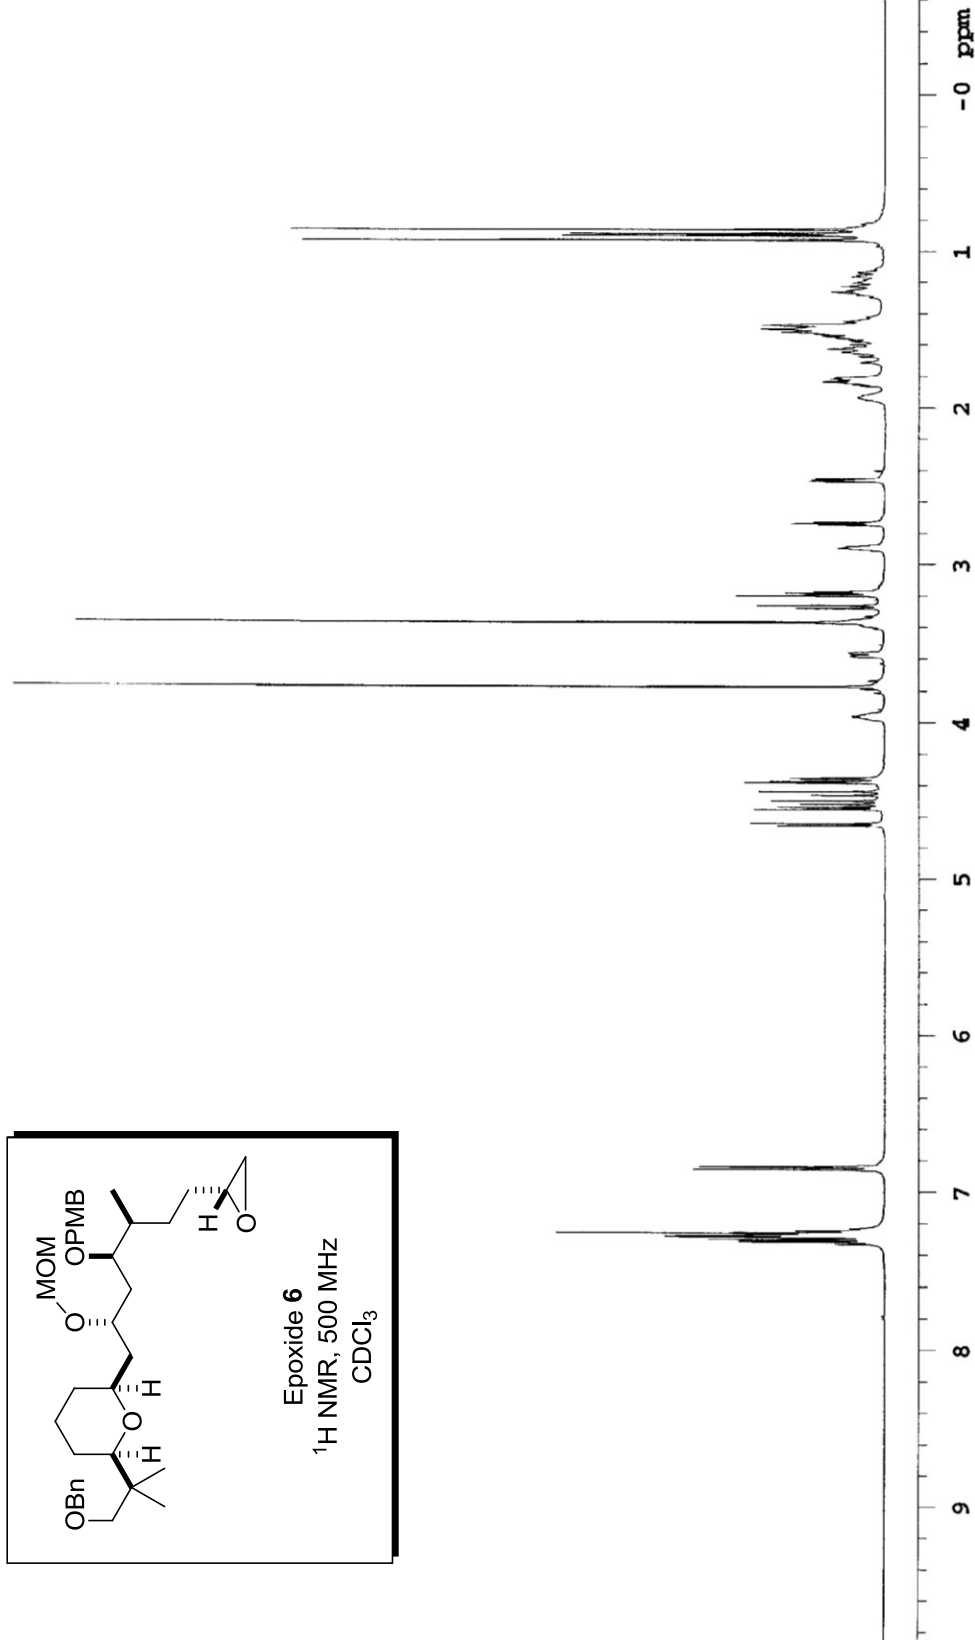

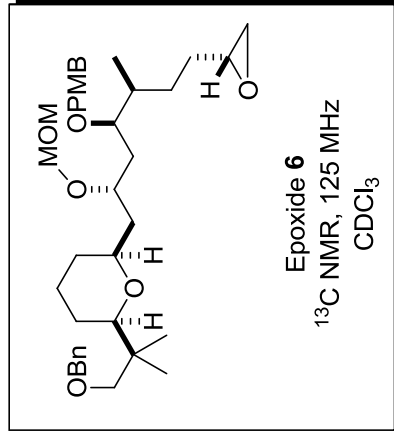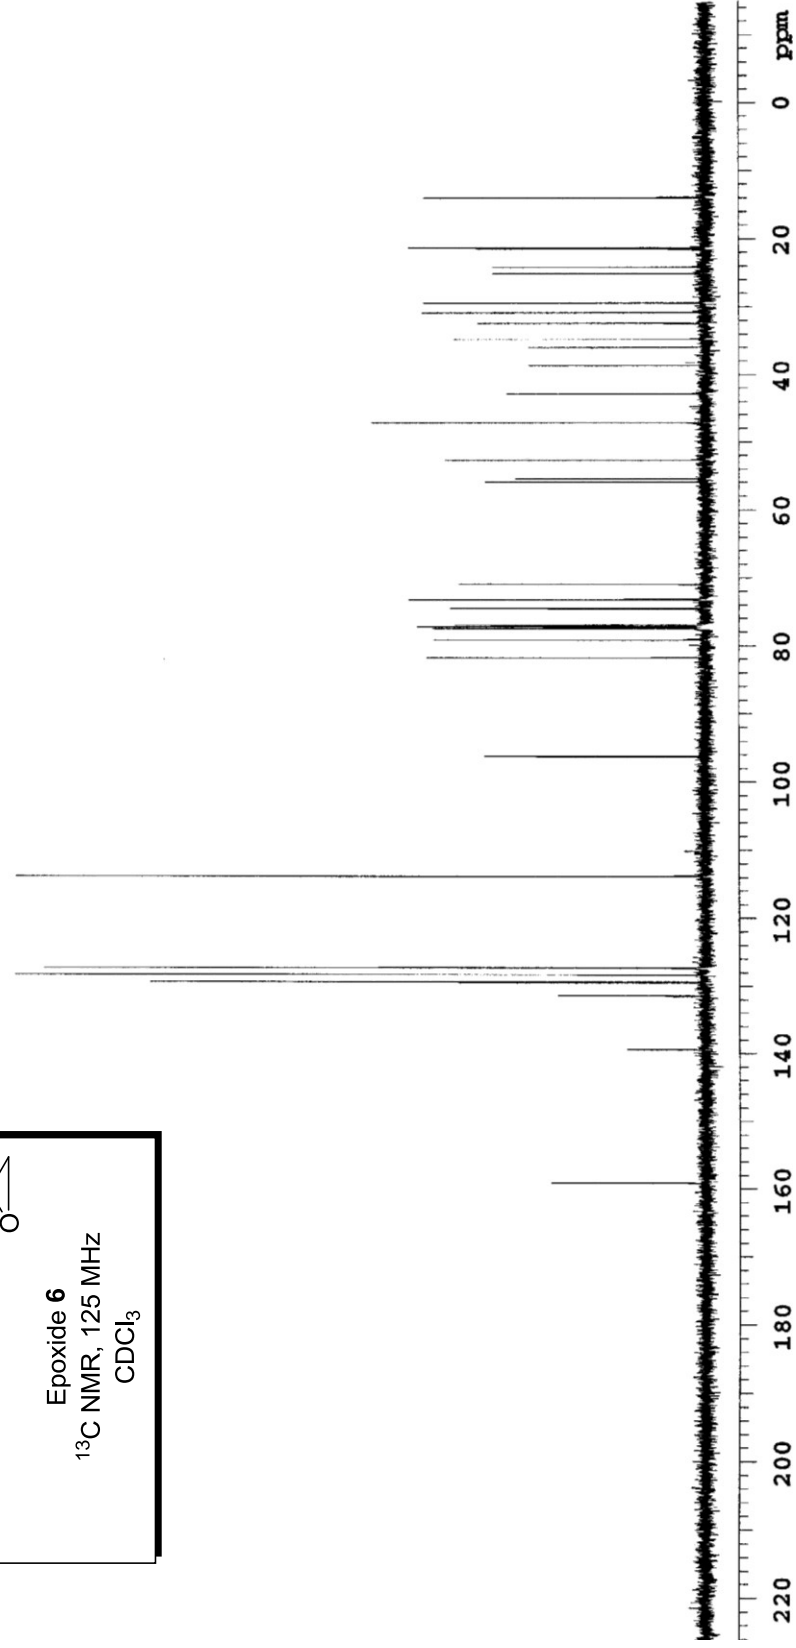

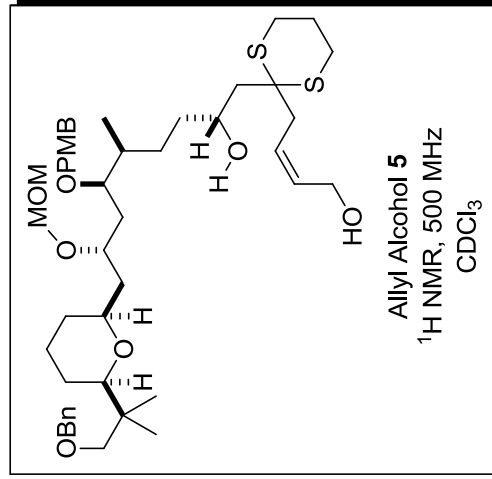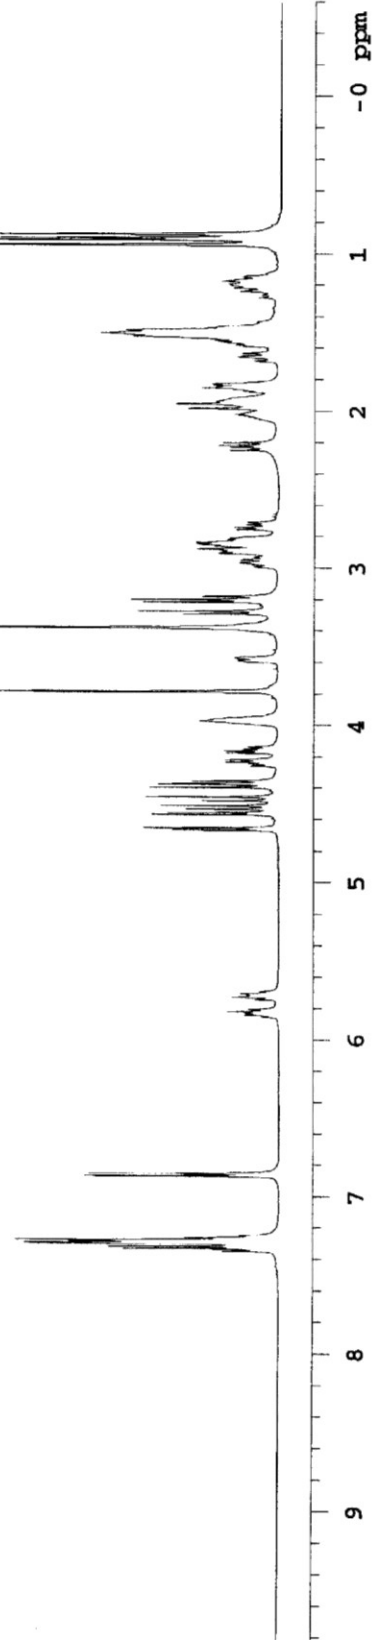

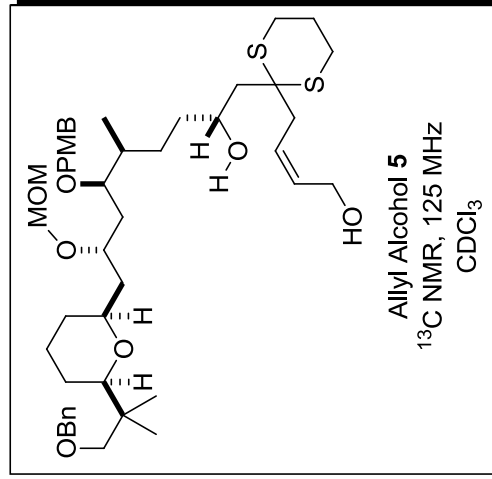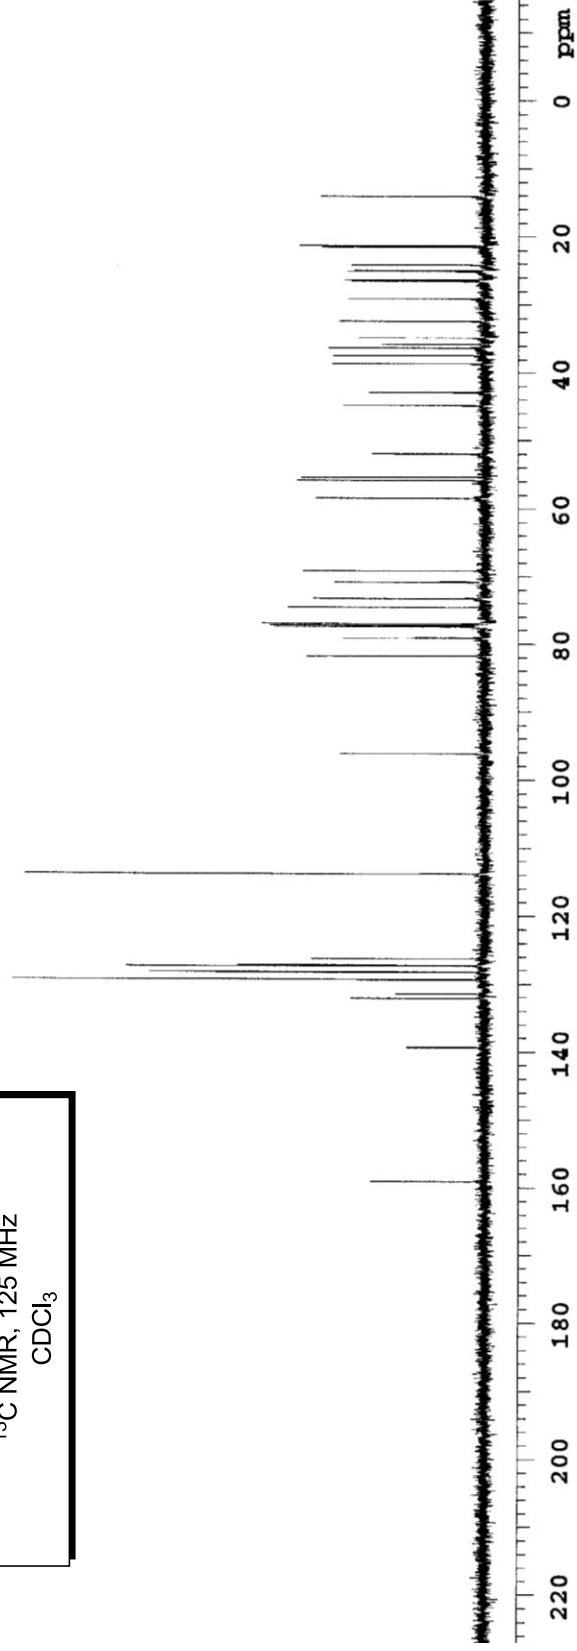

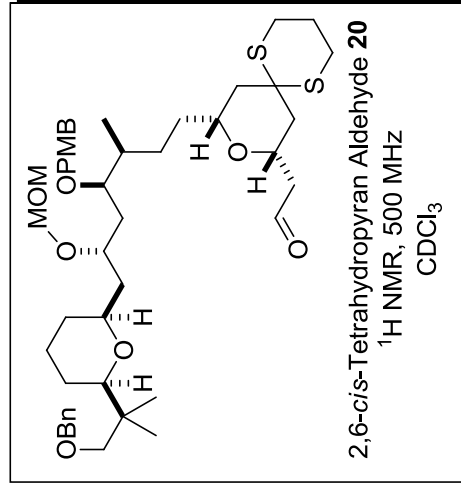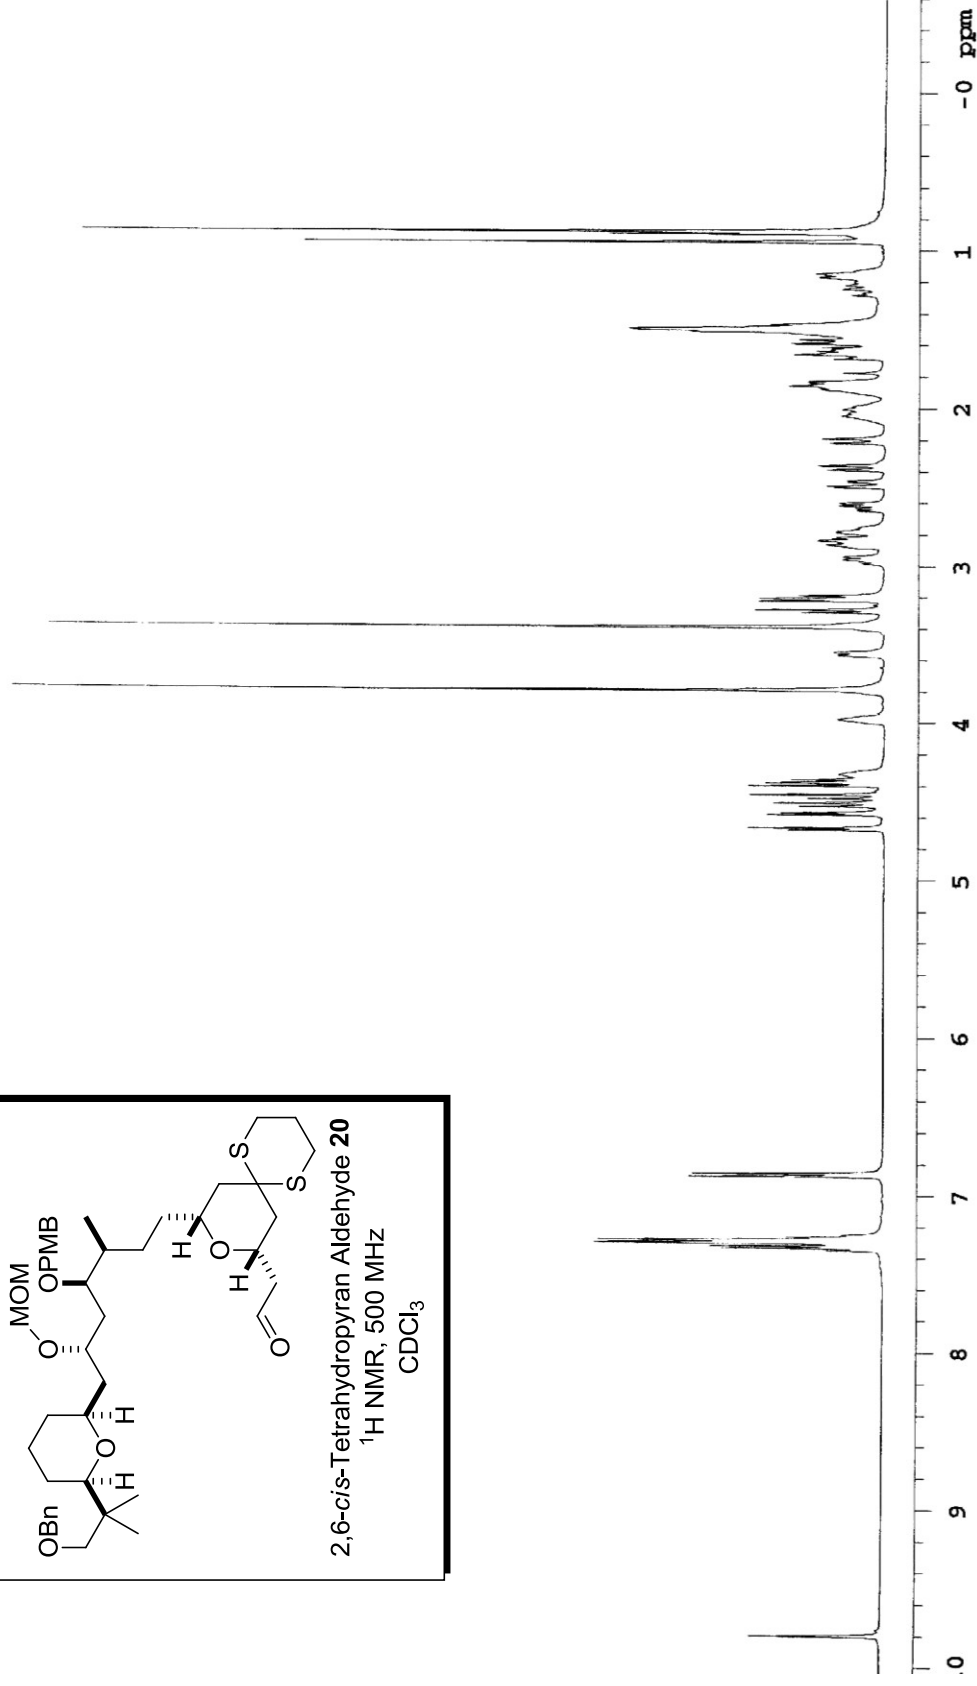

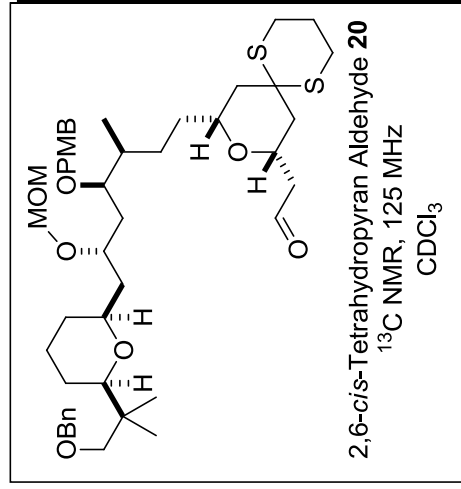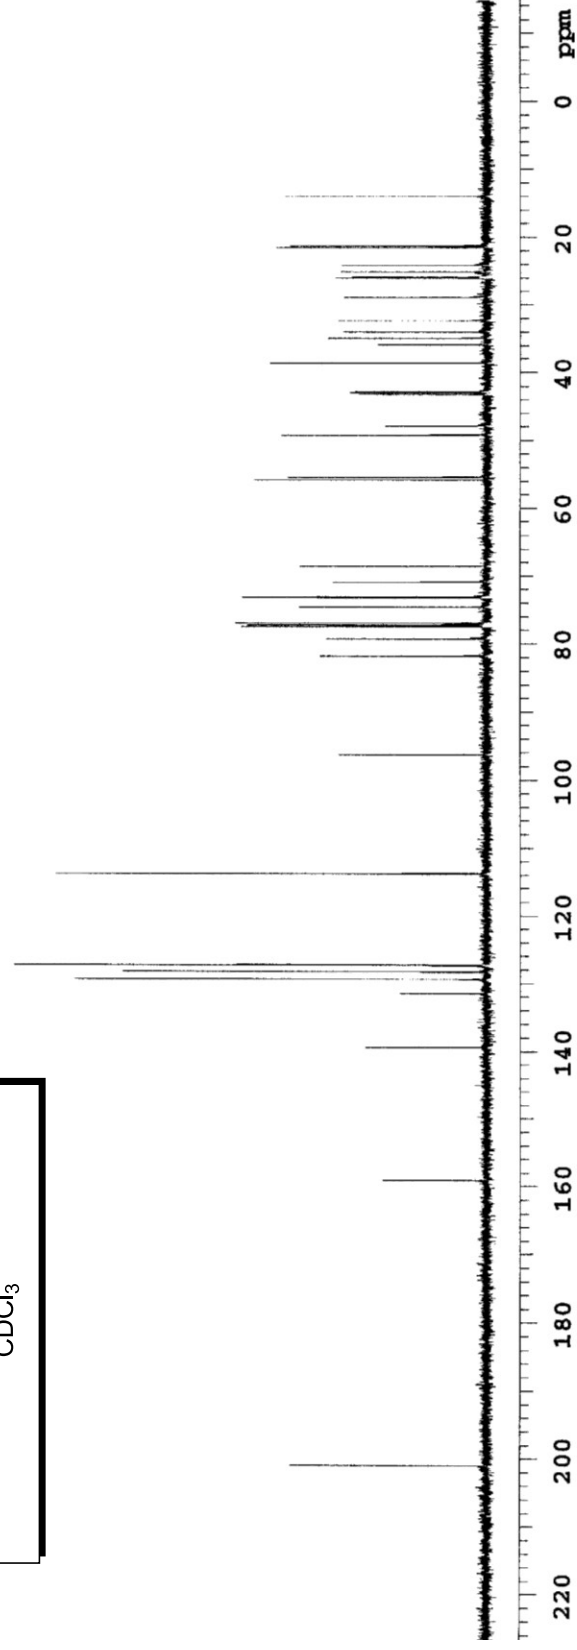

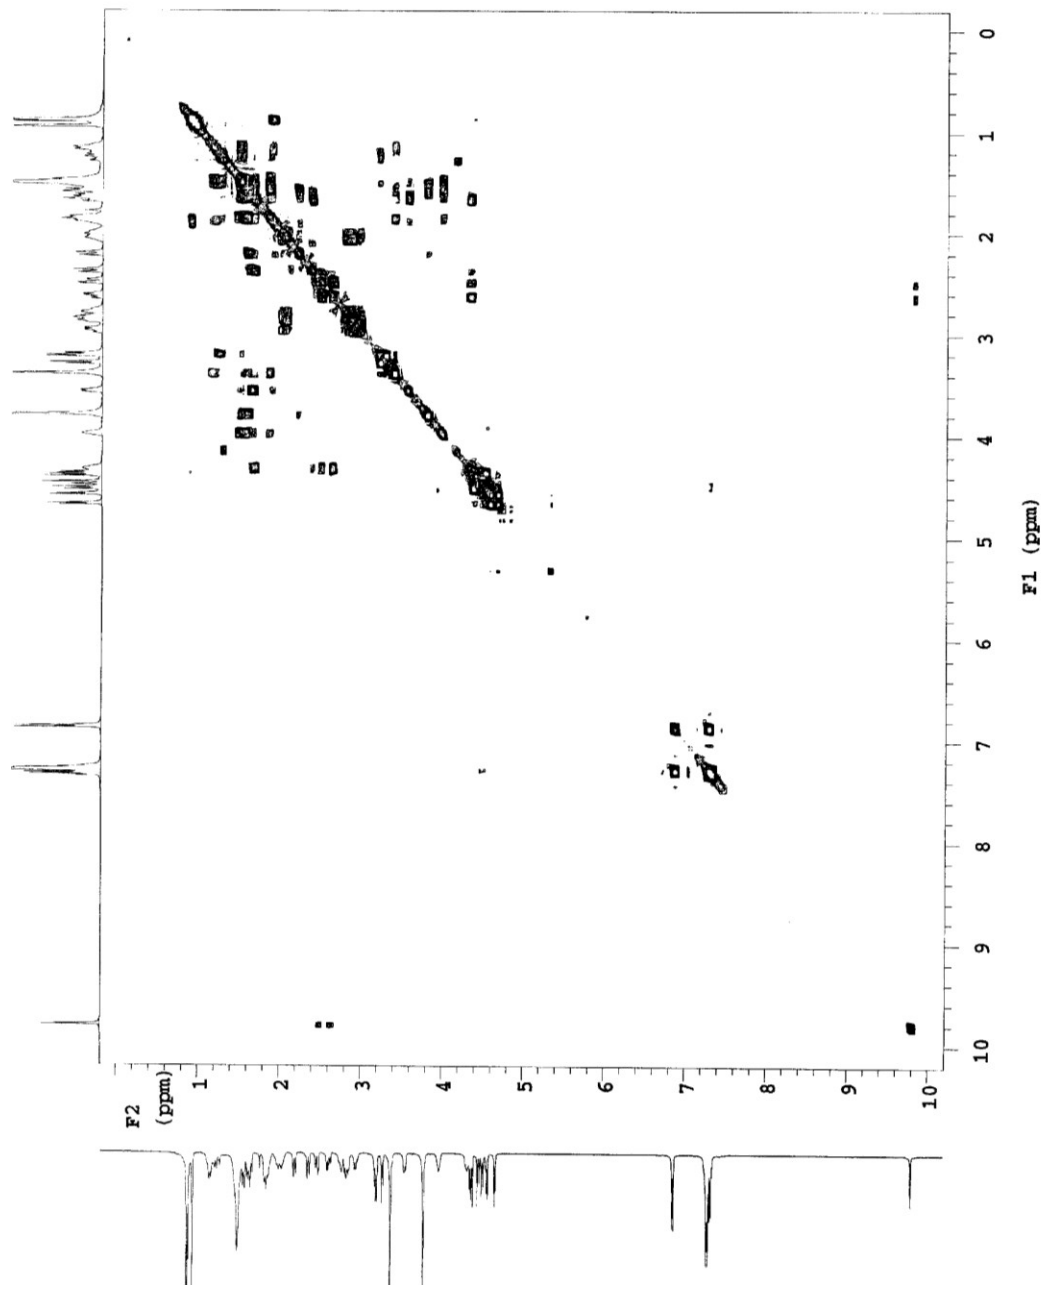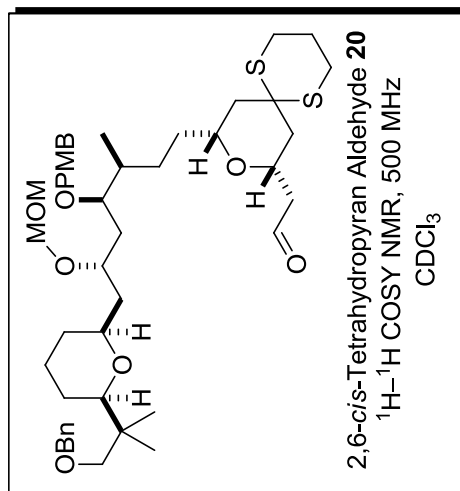

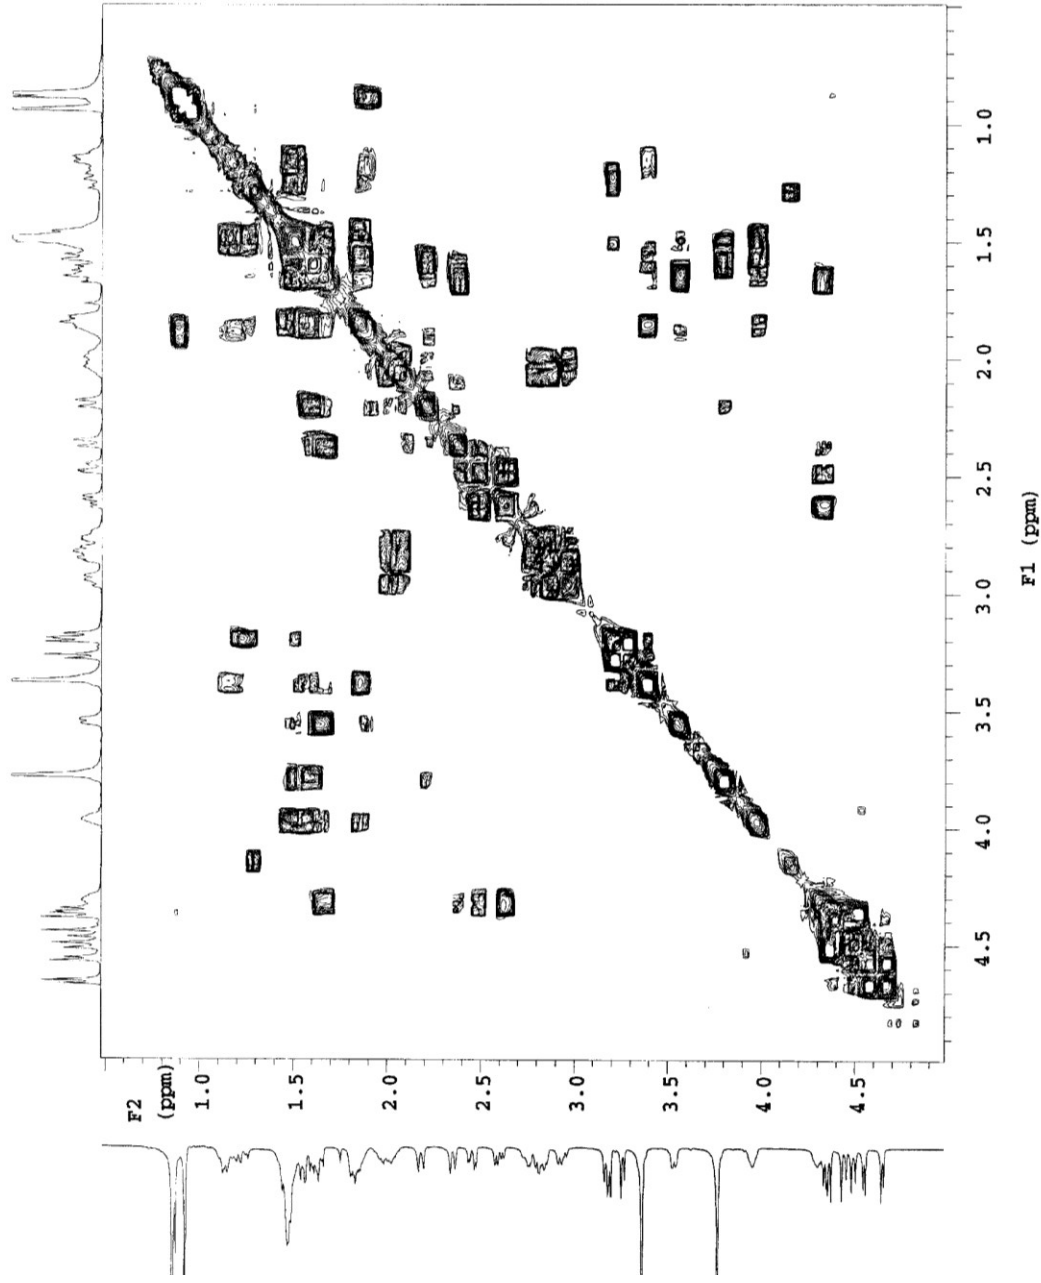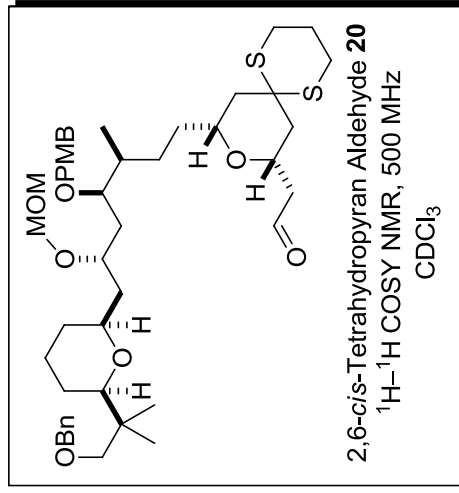



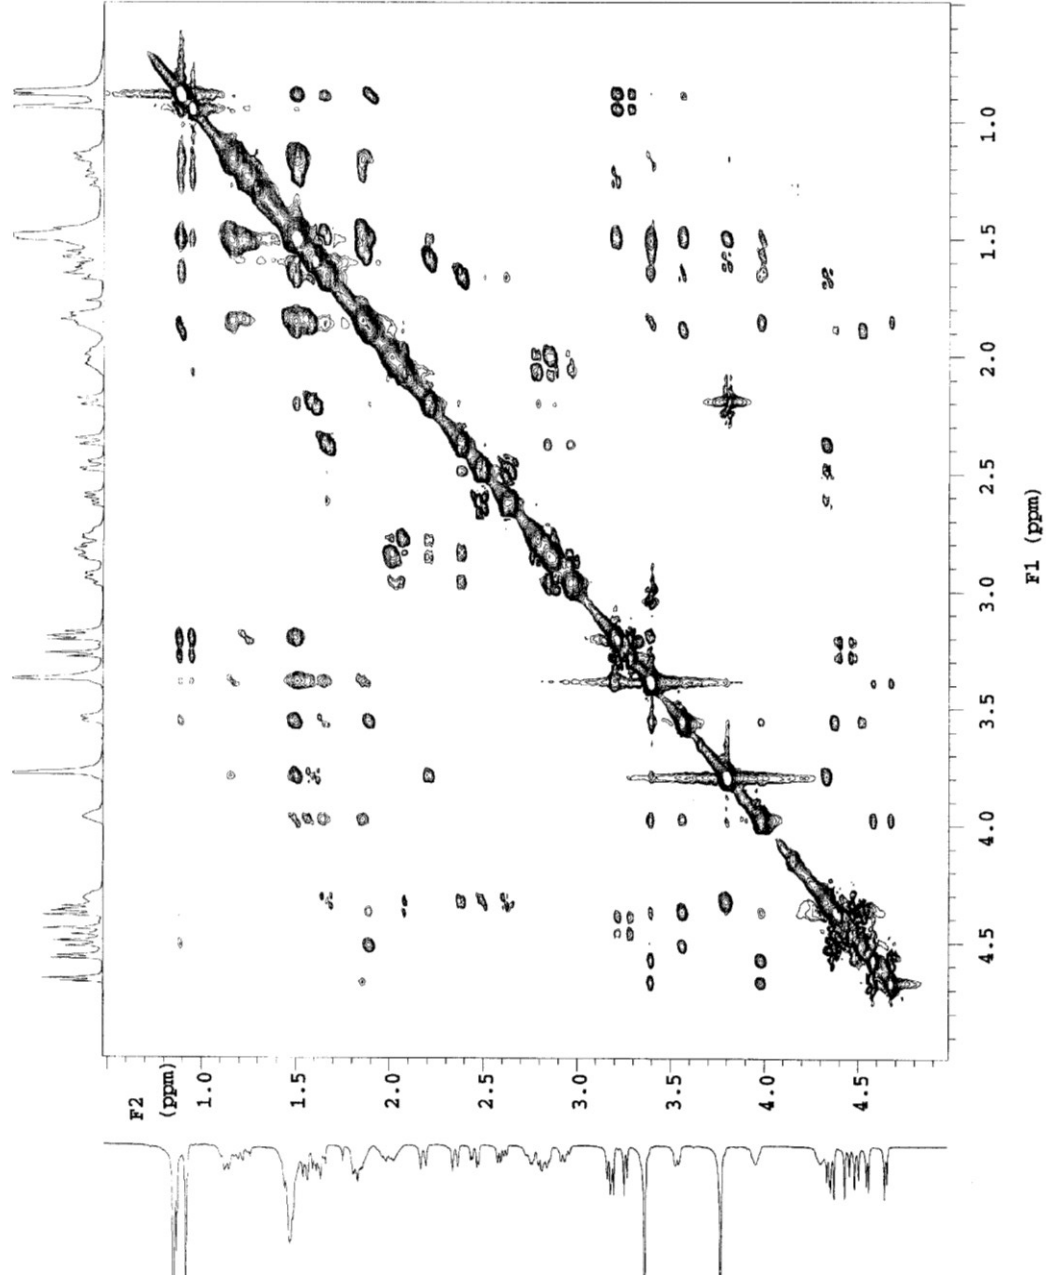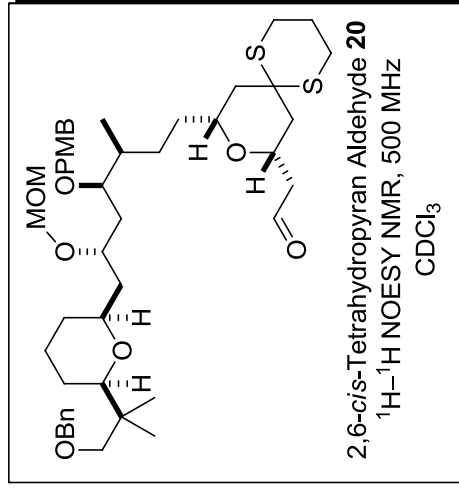

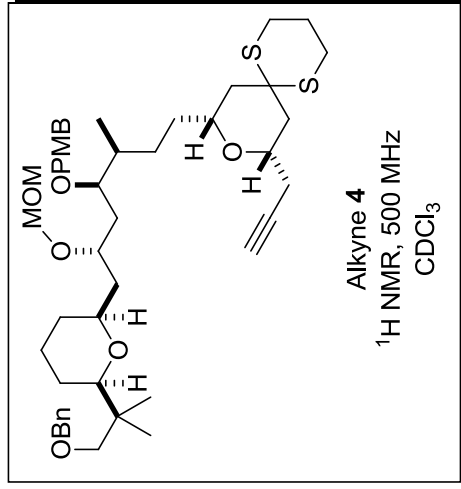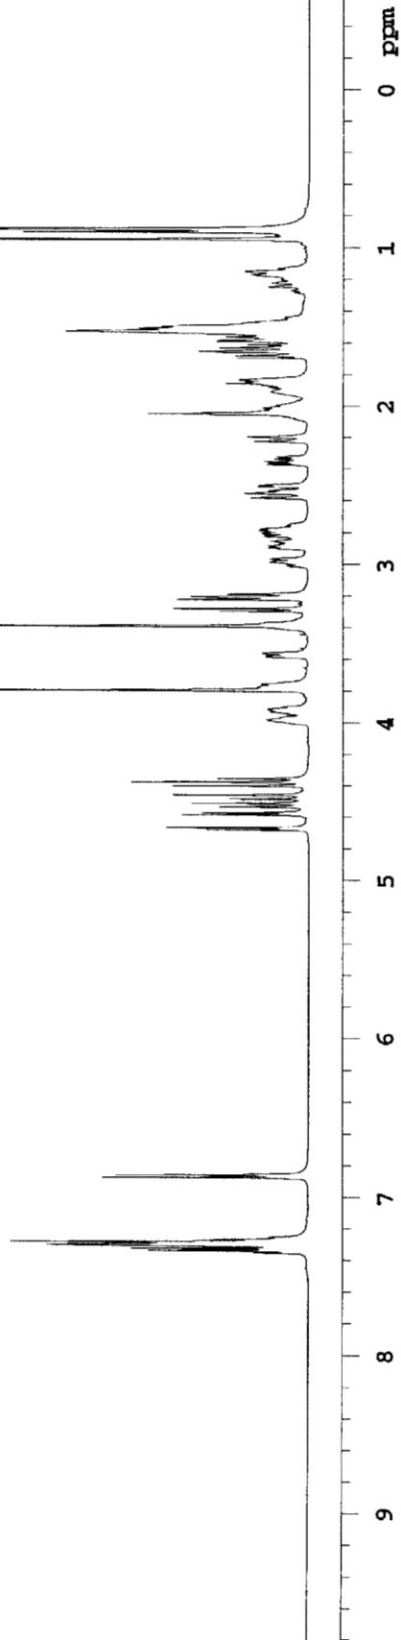

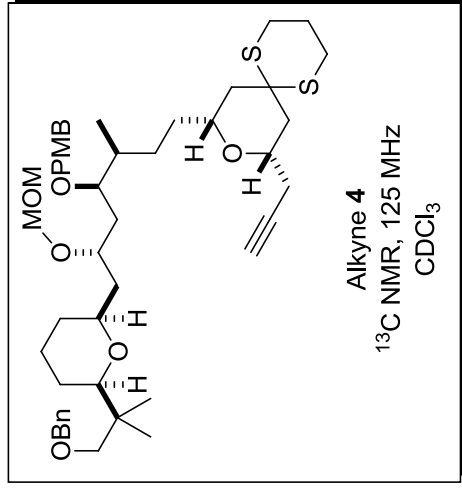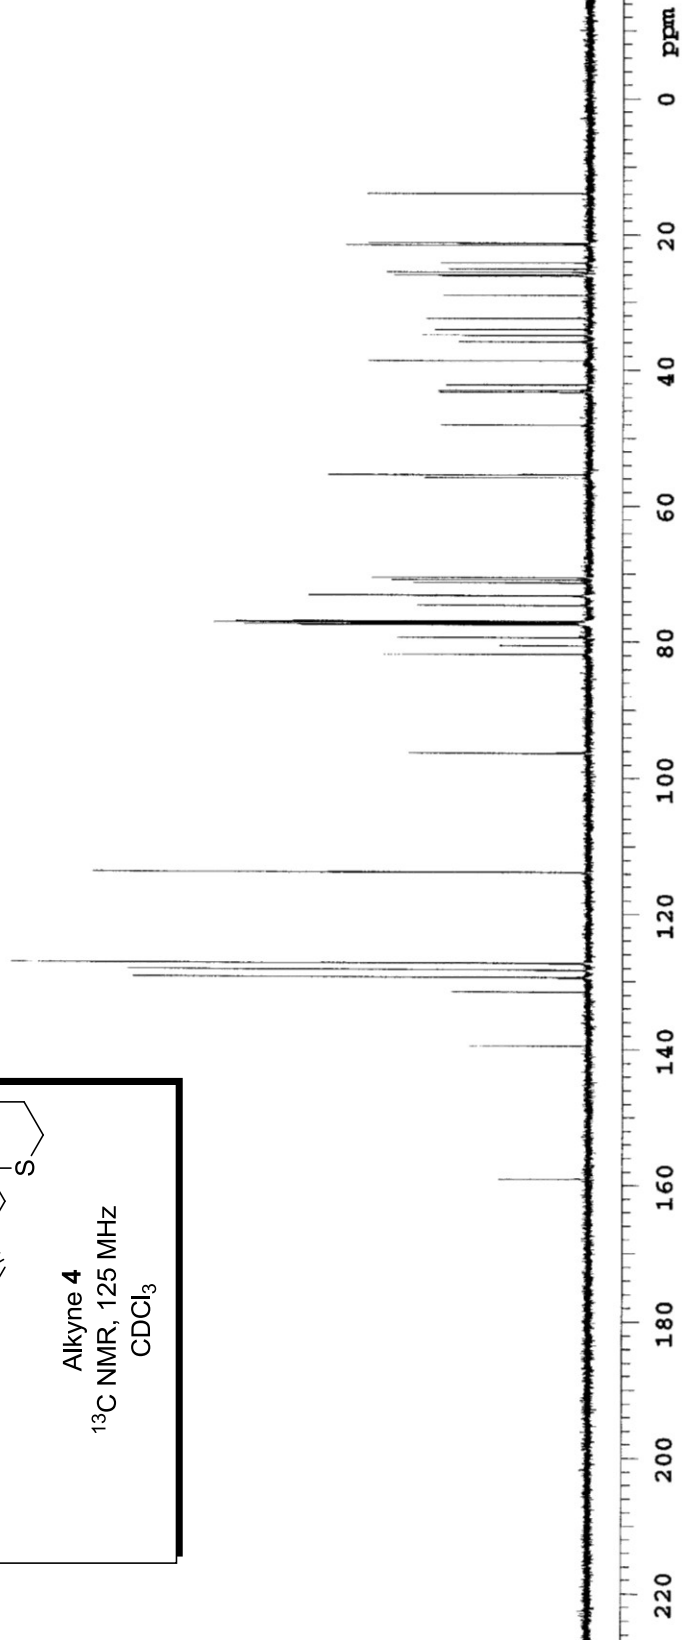

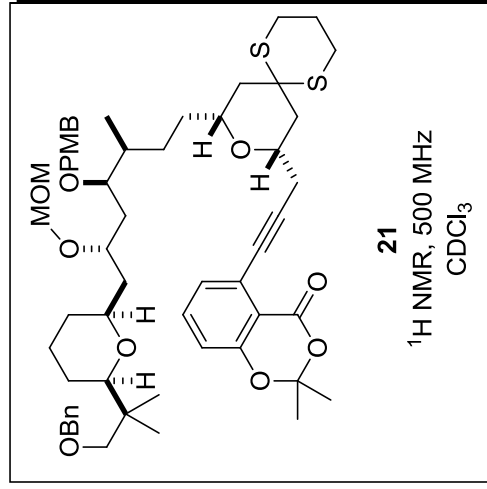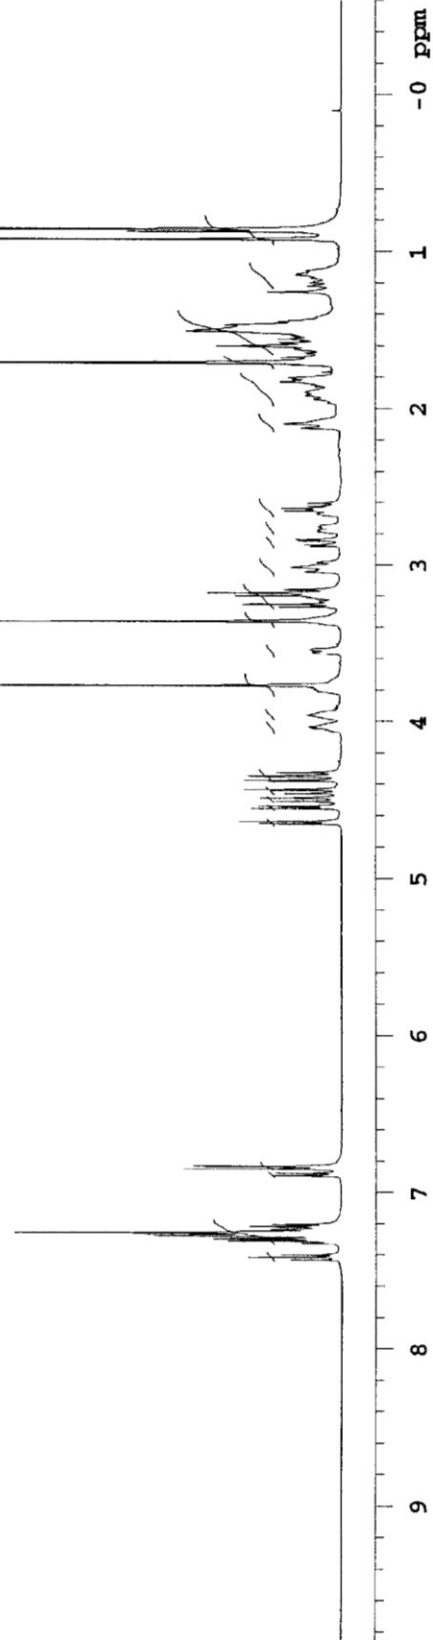

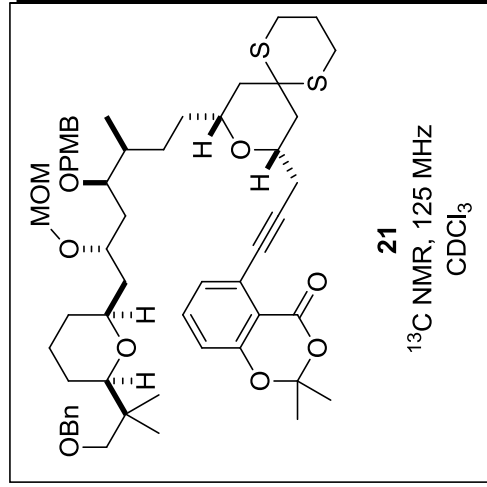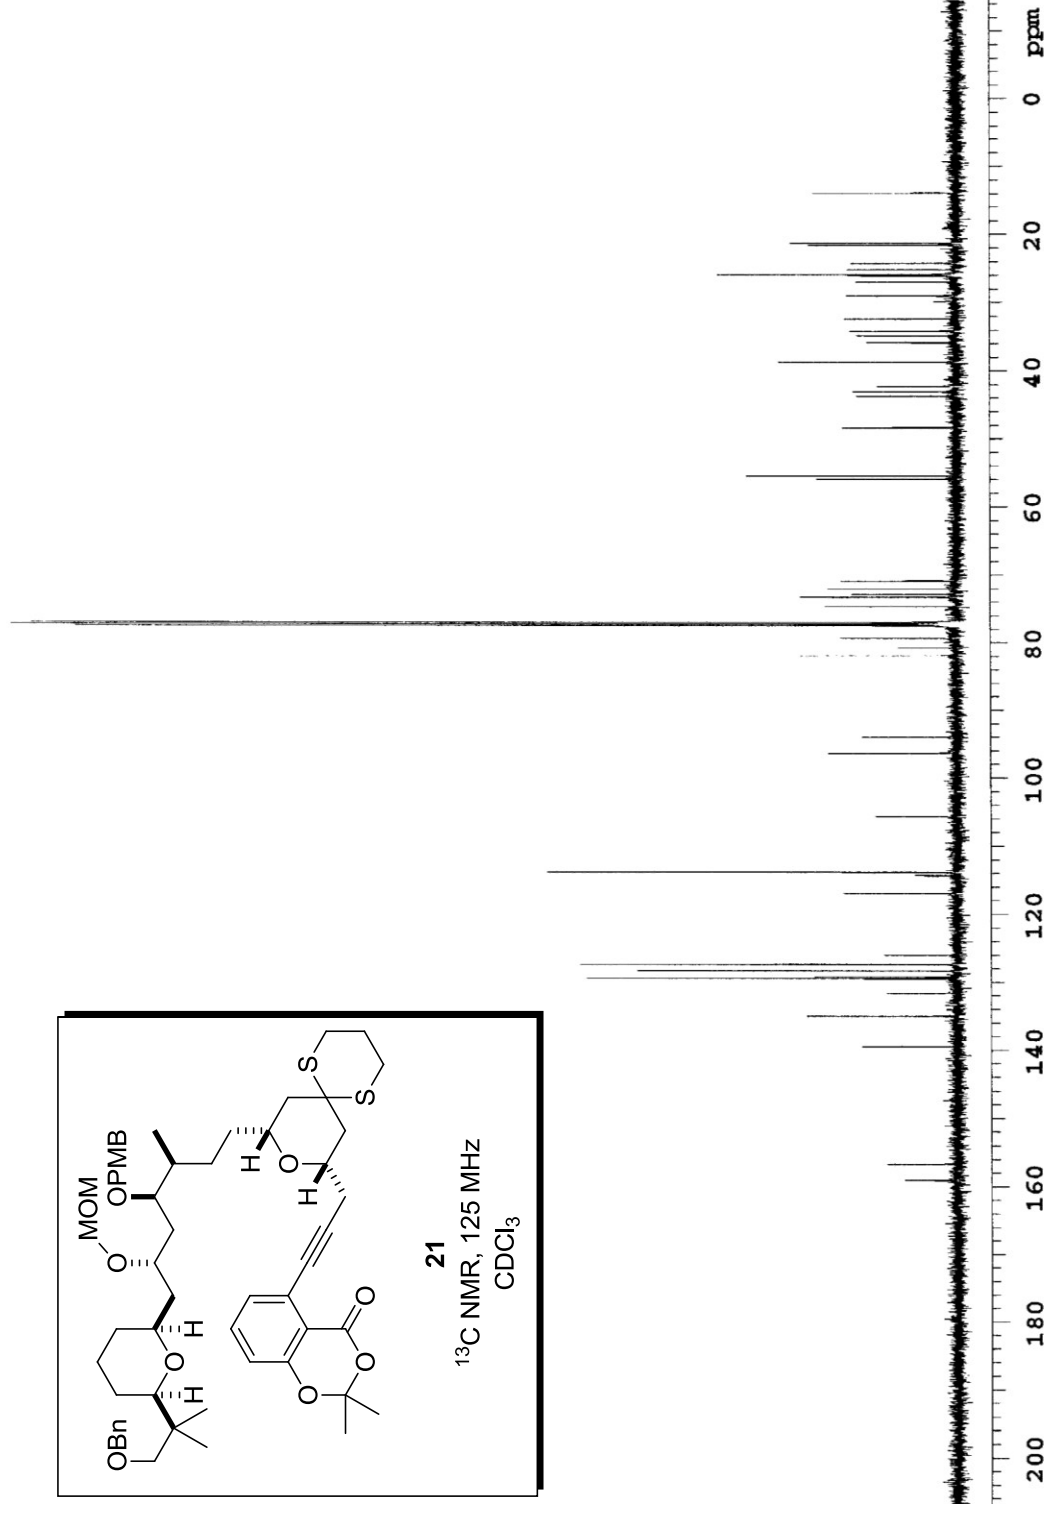

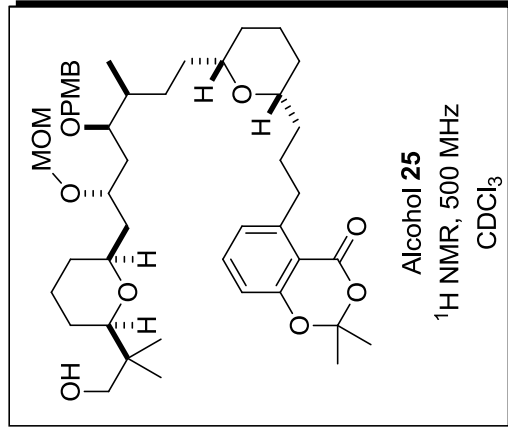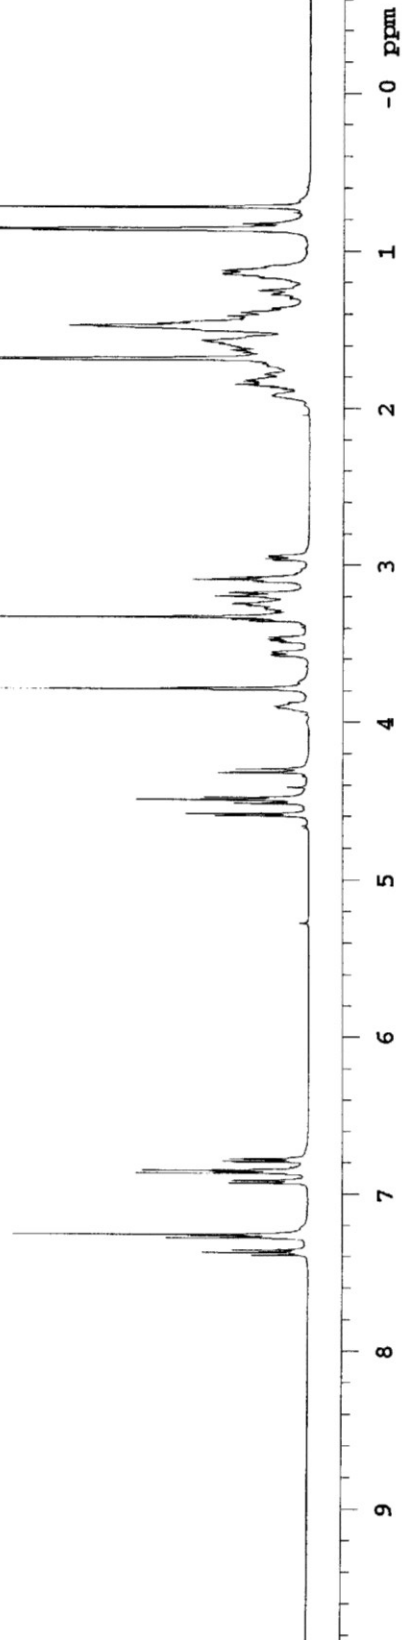

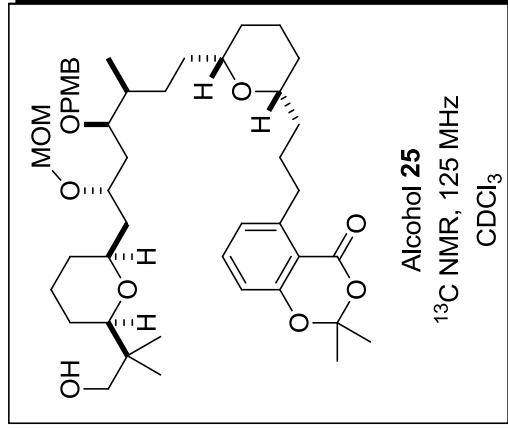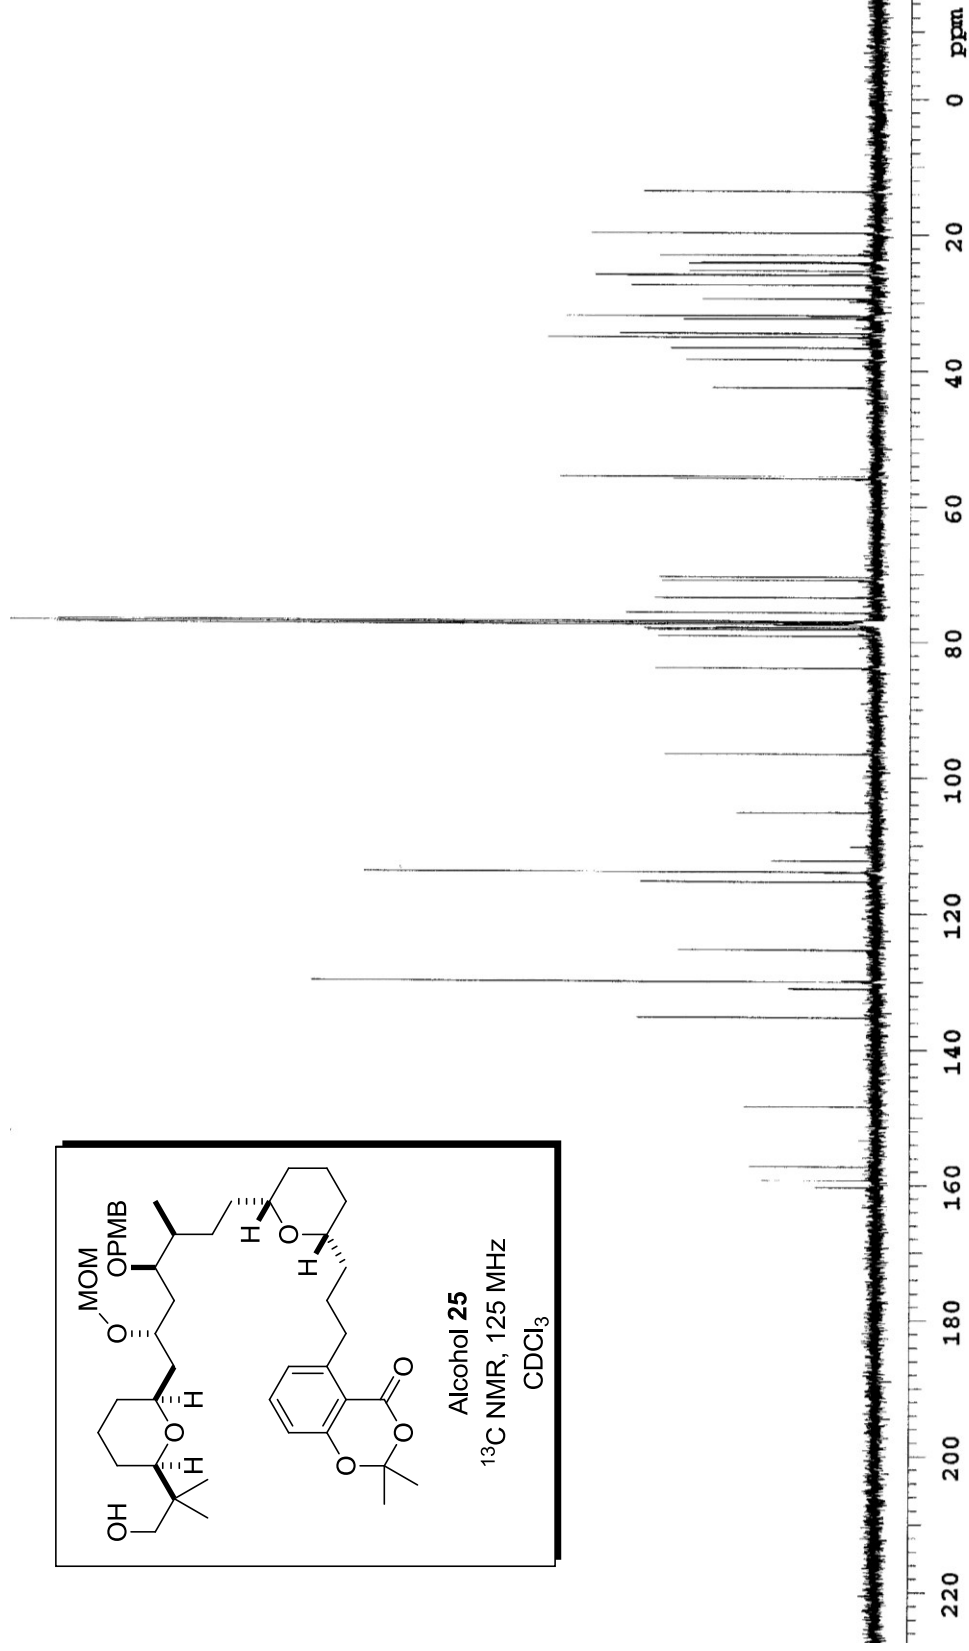

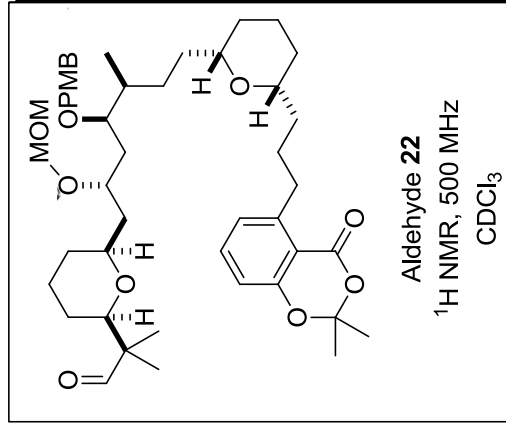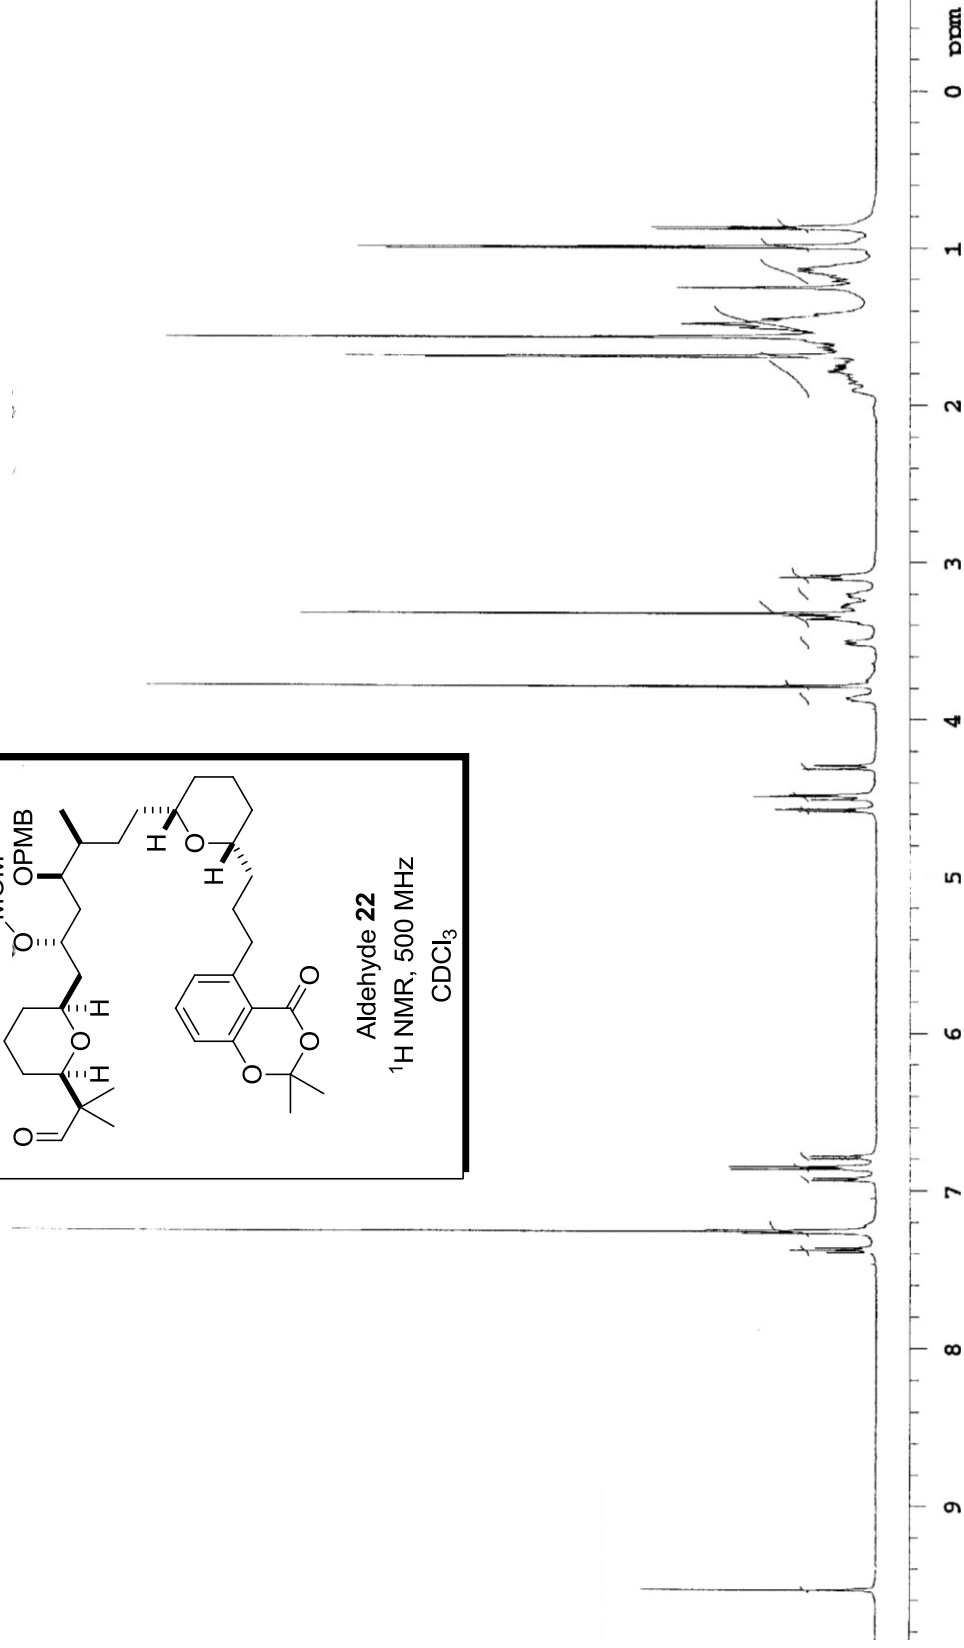

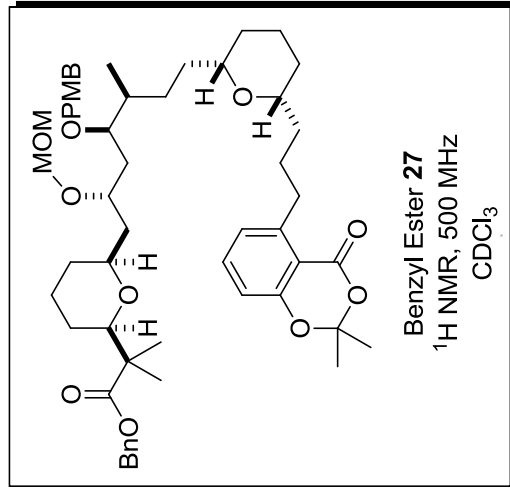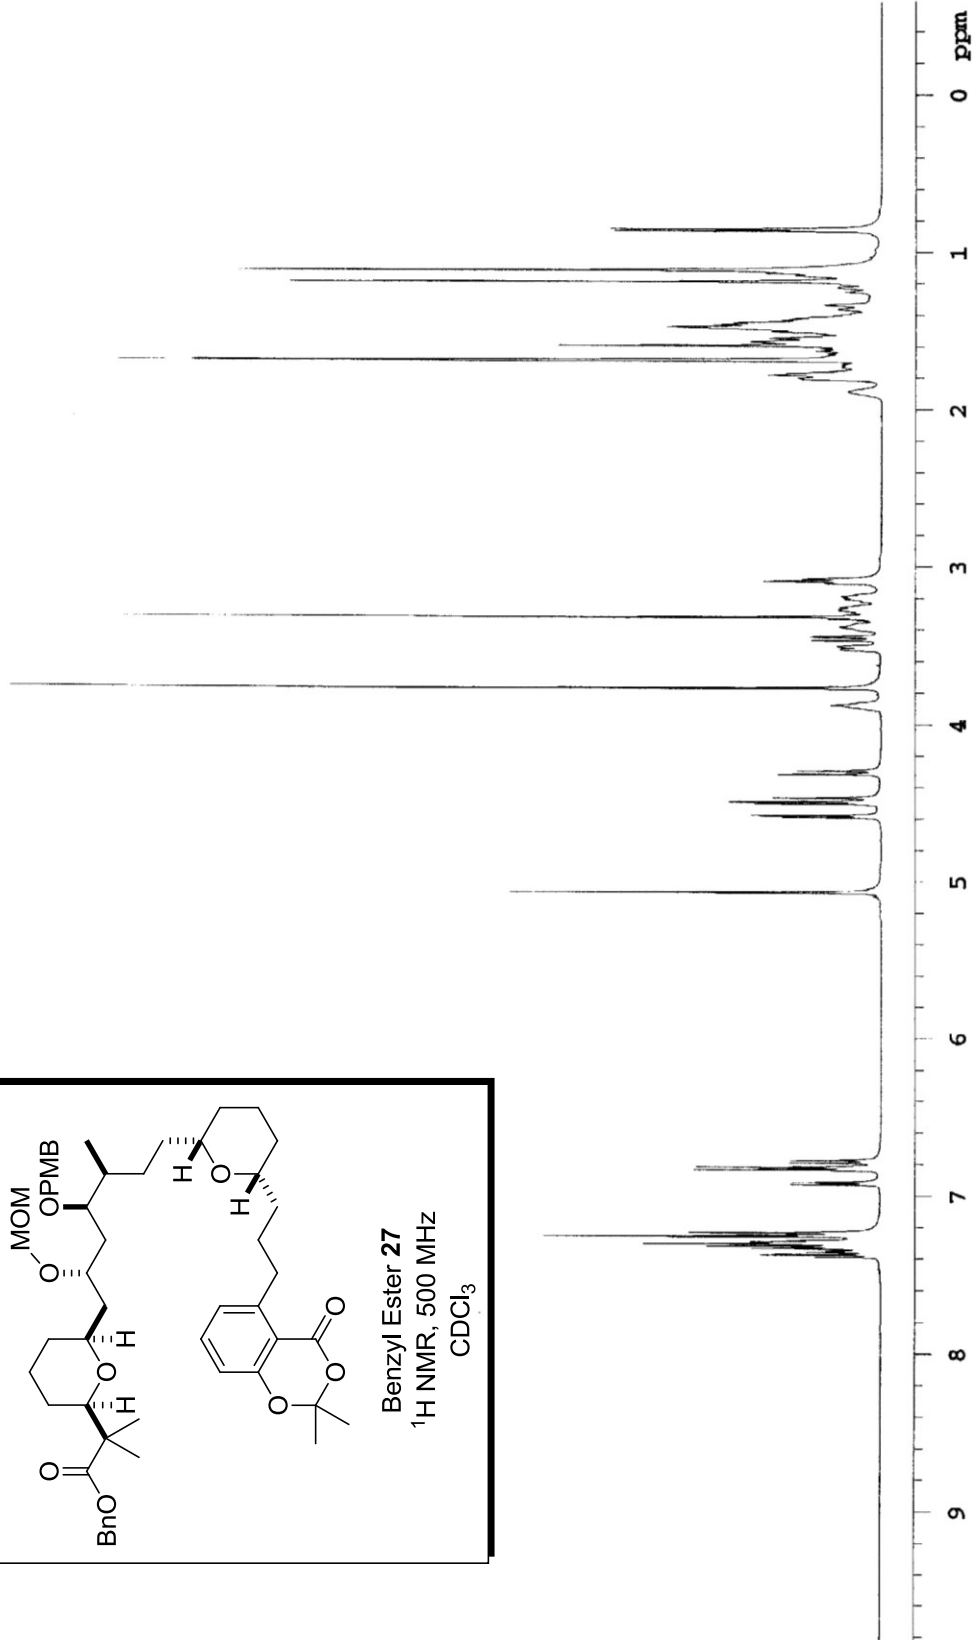

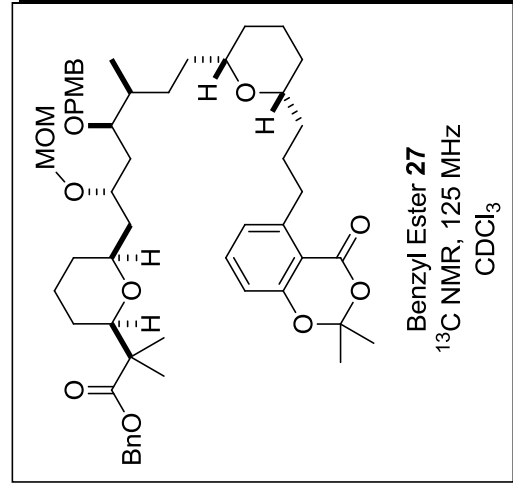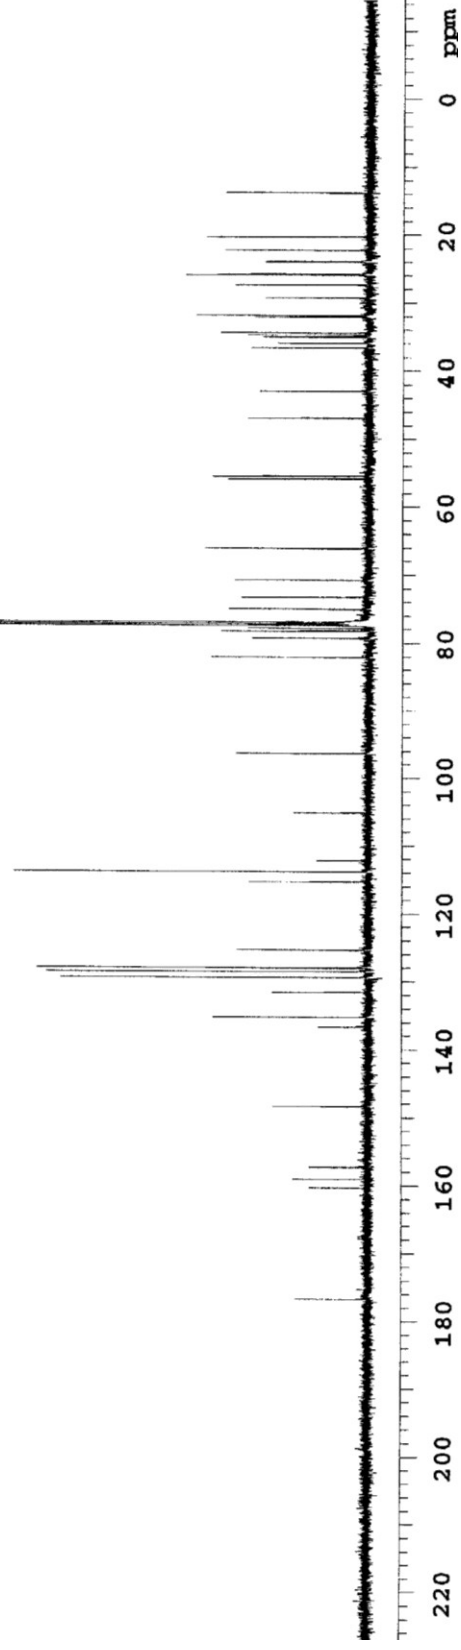

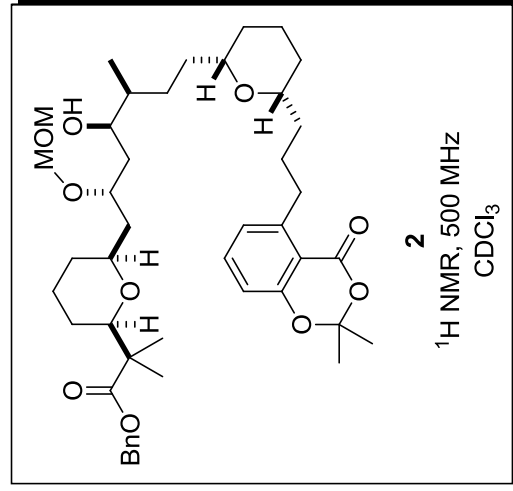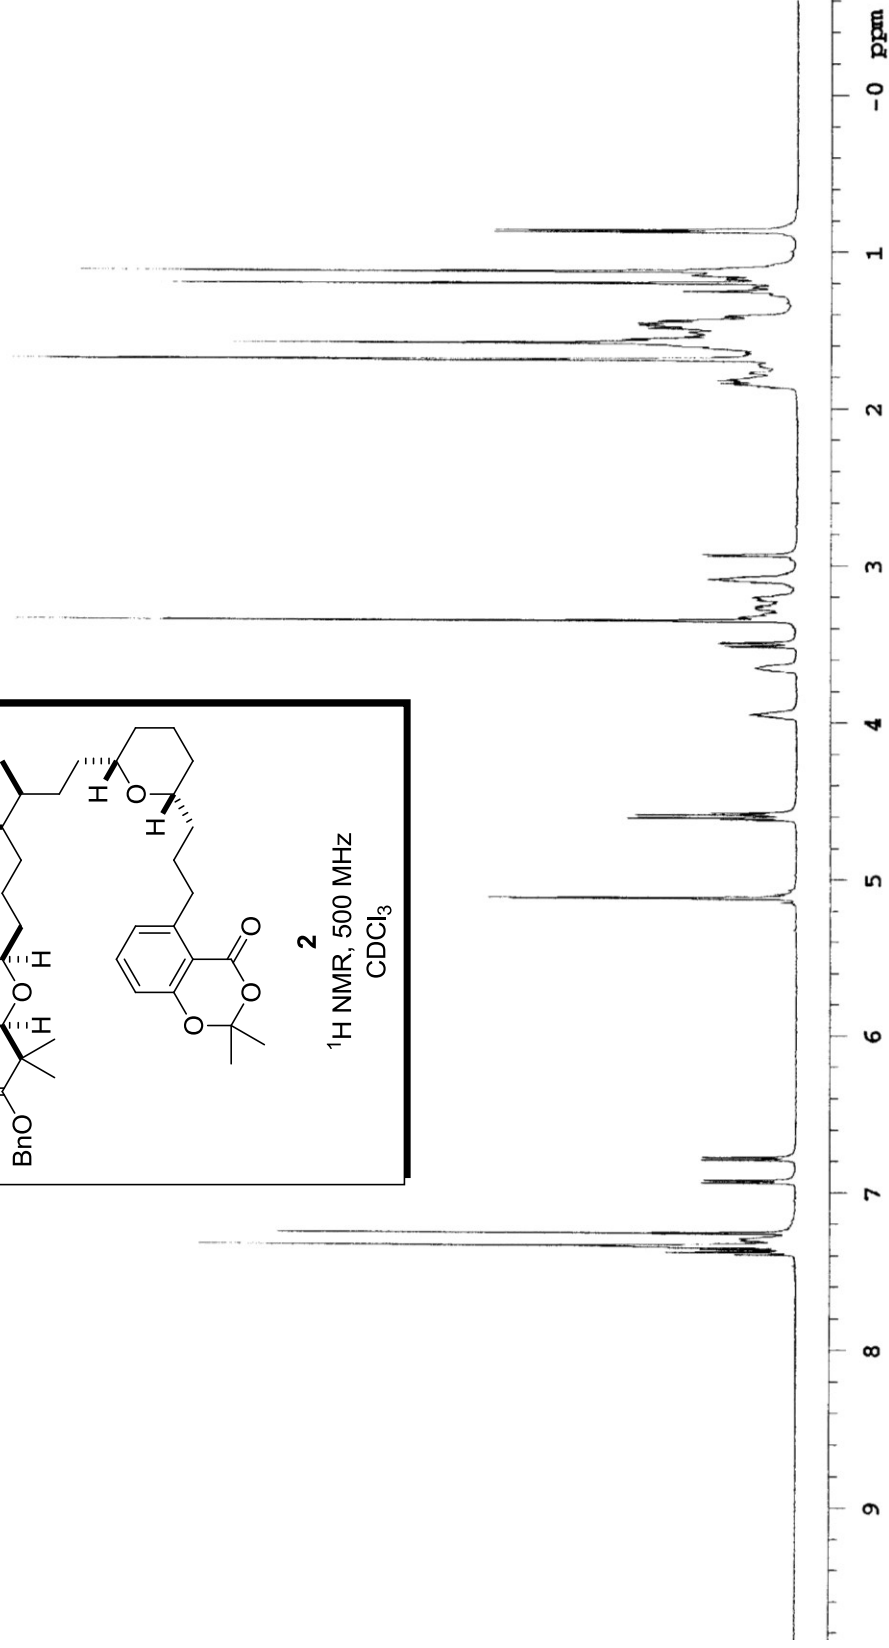

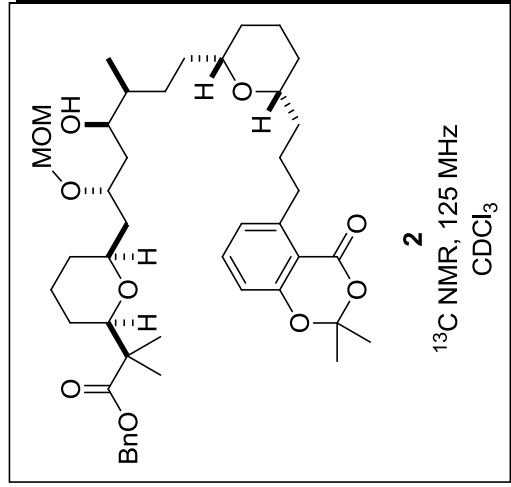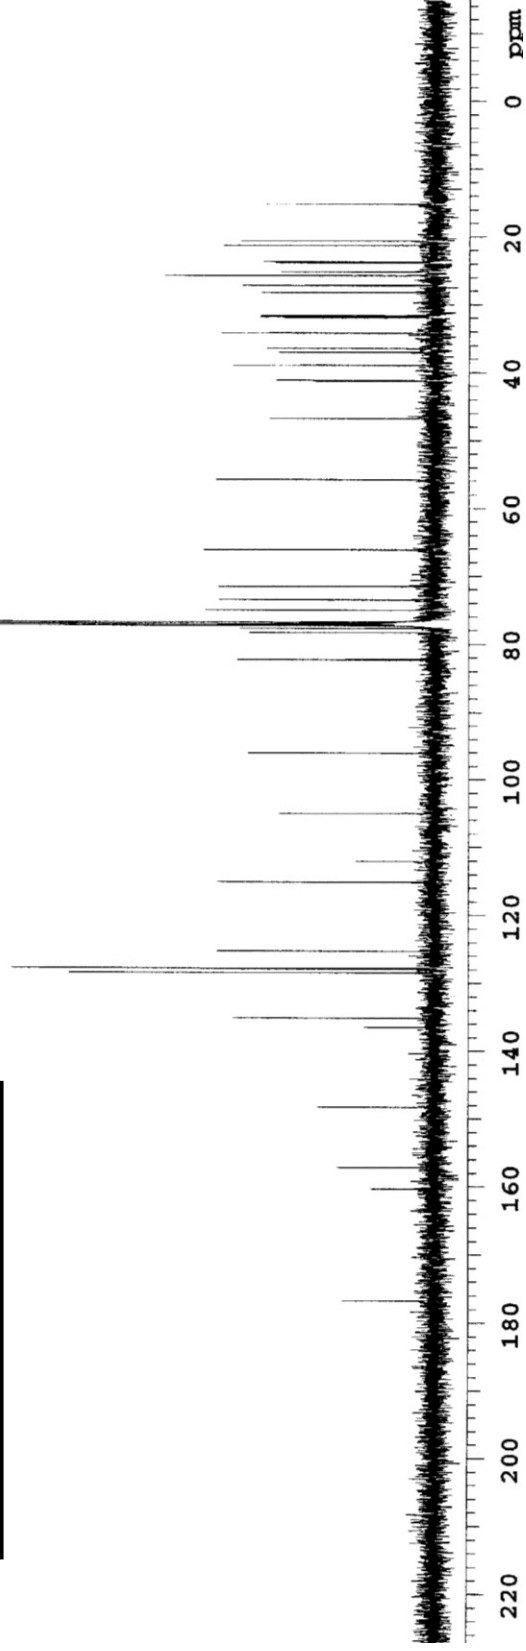

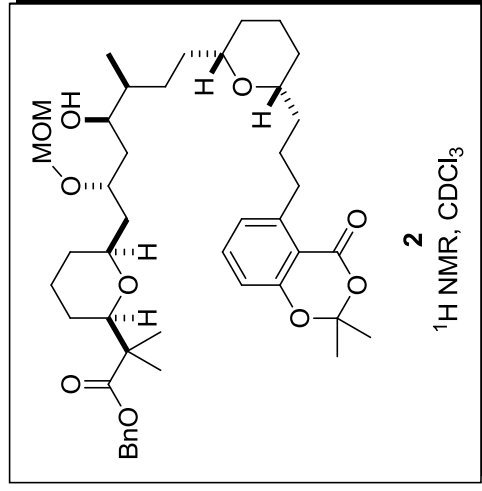

Hong's  
 Synthetic 2  
 500 MHz

De Brabander's  
 Synthetic 2  
 400 MHz

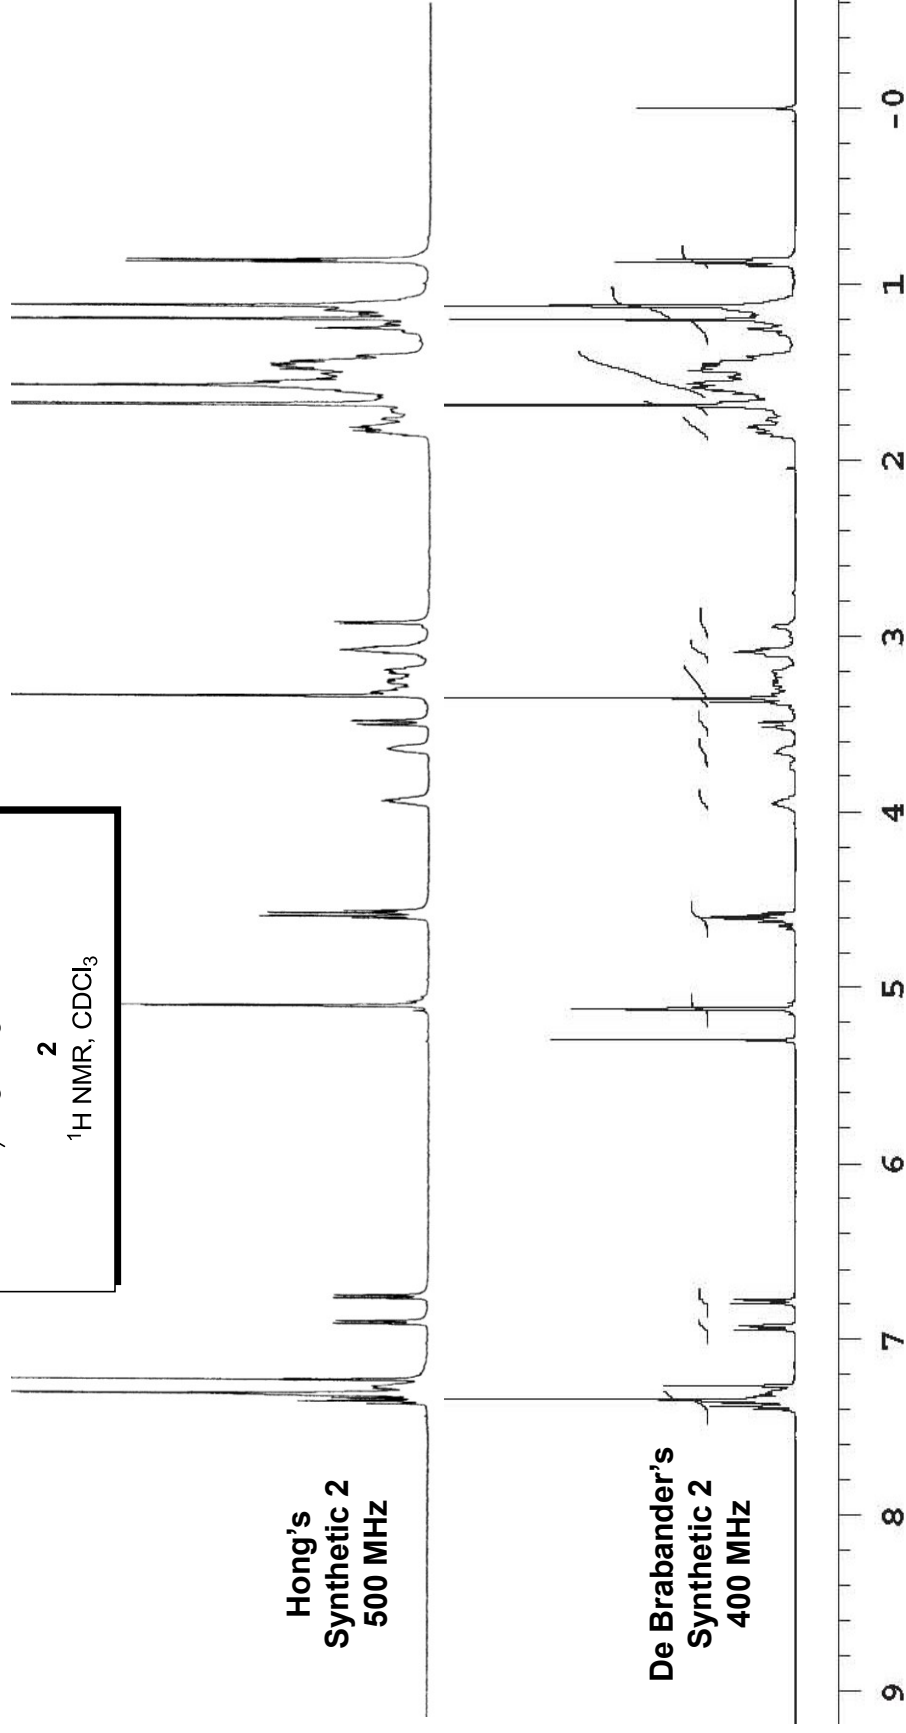

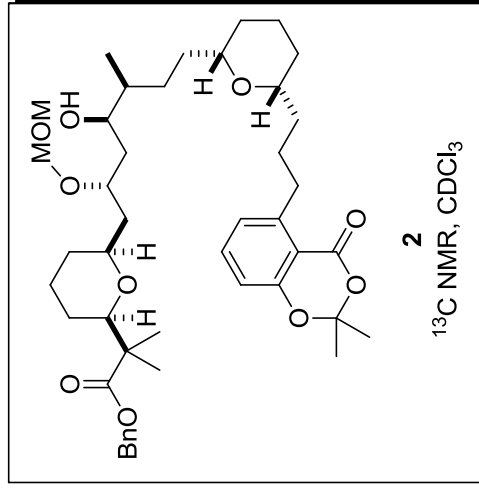

**Hong's  
 Synthetic 2  
 125 MHz**

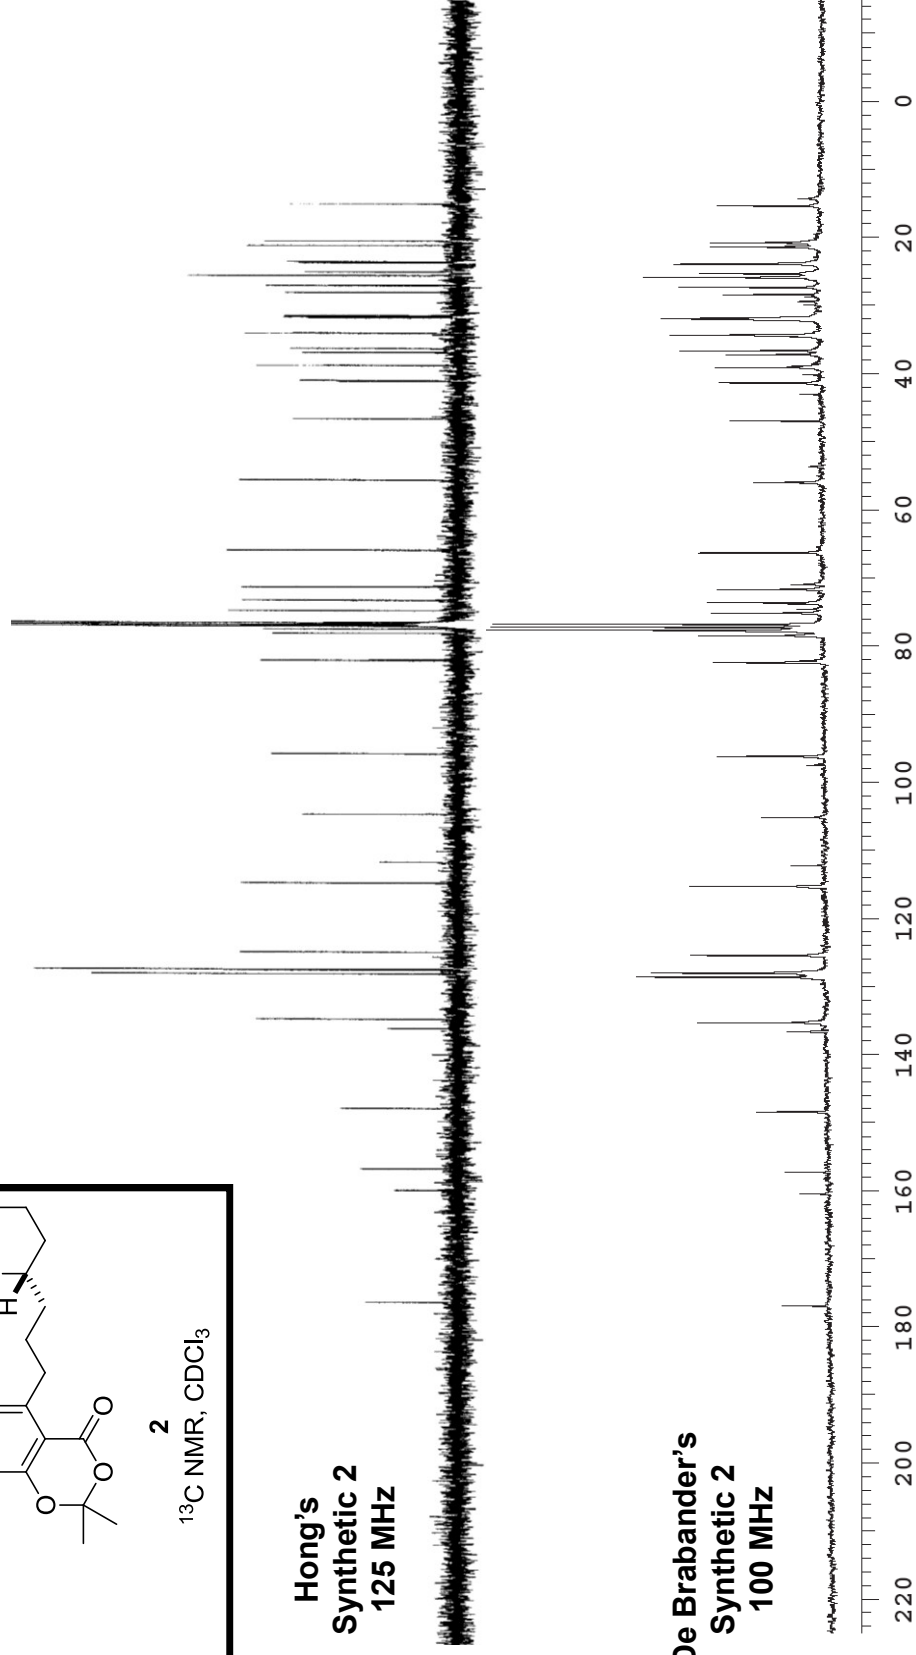

**De Brabander's  
 Synthetic 2  
 100 MHz**

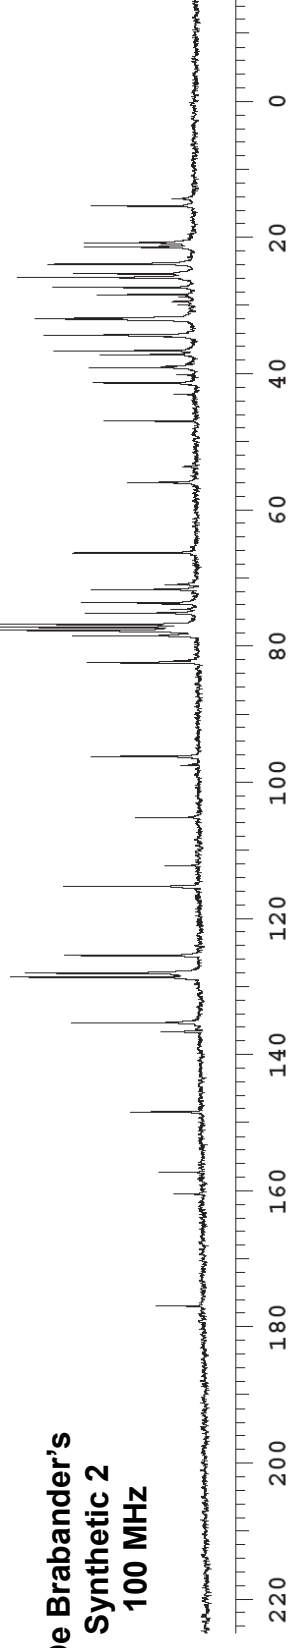

Supplement: Supplementary file 1 [file 4281622]
